# Supplementary material for: Delays between the onset of symptoms and first rheumatology consultation in patients with rheumatoid arthritis in the UK: an observational study
Source: PubMed Central journal article supplement — BMJ Open. 2019 Mar 4;9(3):e024361. doi: 10.1136/bmjopen-2018-024361 (PMC6429945; doi:10.1136/bmjopen-2018-024361), 2019-03-04
Supplement: bmjopen-2018-024361.draft_revisions.pdf [file bmjopen-2018-024361.draft_revisions.pdf]

# BMJ Open

BMJ Open is committed to open peer review. As part of this commitment we make the peer review history of every article we publish publicly available.

When an article is published we post the peer reviewers' comments and the authors' responses online. We also post the versions of the paper that were used during peer review. These are the versions that the peer review comments apply to.

The versions of the paper that follow are the versions that were submitted during the peer review process. They are not the versions of record or the final published versions. They should not be cited or distributed as the published version of this manuscript.

BMJ Open is an open access journal and the full, final, typeset and author-corrected version of record of the manuscript is available on our site with no access controls, subscription charges or pay-per-view fees (<http://bmjopen.bmj.com>).

If you have any questions on BMJ Open's open peer review process please email [editorial.bmjopen@bmj.com](mailto:editorial.bmjopen@bmj.com)

# BMJ Open

## Delays between the onset of symptoms and first rheumatology consultation in patients with rheumatoid arthritis in the UK

|                               |                                                                                                                                                                                                                                                                                                                                                                                                                                                                                                                                                                                                                                                                                                                                                                   |
|-------------------------------|-------------------------------------------------------------------------------------------------------------------------------------------------------------------------------------------------------------------------------------------------------------------------------------------------------------------------------------------------------------------------------------------------------------------------------------------------------------------------------------------------------------------------------------------------------------------------------------------------------------------------------------------------------------------------------------------------------------------------------------------------------------------|
| Journal:                      | <i>BMJ Open</i>                                                                                                                                                                                                                                                                                                                                                                                                                                                                                                                                                                                                                                                                                                                                                   |
| Manuscript ID                 | bmjopen-2018-024361                                                                                                                                                                                                                                                                                                                                                                                                                                                                                                                                                                                                                                                                                                                                               |
| Article Type:                 | Research                                                                                                                                                                                                                                                                                                                                                                                                                                                                                                                                                                                                                                                                                                                                                          |
| Date Submitted by the Author: | 23-May-2018                                                                                                                                                                                                                                                                                                                                                                                                                                                                                                                                                                                                                                                                                                                                                       |
| Complete List of Authors:     | Stack, Rebecca; Nottingham Trent University , Division of Psychology<br>Nightingale, Peter; Queen Elizabeth Hospital Birmingham, Wellcome Trust<br>Clinical Research Facility<br>Jinks, Clare; Keele University, Arthritis Research UK Primary Care Centre<br>Shaw, Karen; University of Birmingham, Institute of Applied Health<br>Research<br>Herron-Marx, Sandy; Independent Research Consultant<br>Horne, Rob; UCL, UCL School of Pharmacy<br>Deighton, Chris; Derby Teaching Hospitals NHS Foundation Trust<br>Kiely, Patrick ; St George's University Hospitals NHS Foundation Trust<br>Mallen, Christian; Keele University, Arthritis Research UK Primary Care<br>Centre<br>Raza, Karim; University of Birmingham, Institute of Inflammation and<br>Ageing |
| Keywords:                     | RHEUMATOLOGY, access to care, help seeking, health service research,<br>rheumatoid arthritis                                                                                                                                                                                                                                                                                                                                                                                                                                                                                                                                                                                                                                                                      |
|                               |                                                                                                                                                                                                                                                                                                                                                                                                                                                                                                                                                                                                                                                                                                                                                                   |

SCHOLARONE™  
Manuscripts

1  
2  
3 **Title: Delays between the onset of symptoms and first rheumatology consultation in**  
4  
5 **patients with rheumatoid arthritis in the UK**  
6  
7

8  
9  
10 **Authors**

11 Rebecca J Stack<sup>1,2</sup>, Peter Nightingale<sup>3</sup>, Clare Jinks<sup>4</sup>, (DELAY study syndicate), Karen Shaw<sup>5</sup>,  
12  
13 Sandy Herron-Marx<sup>6</sup>, Rob Horne<sup>7</sup>, Patrick Kiely<sup>8</sup>, Chris Deighton<sup>9</sup>, Christian D Mallen<sup>4</sup> and  
14  
15 Karim Raza<sup>1,10</sup>  
16  
17  
18  
19  
20

21 **Department and Institutions**  
22

- 23 1. Institute of Inflammation and Ageing, University of Birmingham, UK.  
24  
25 2. Division of Psychology, Nottingham Trent University, Nottingham, UK  
26  
27 3. Wolfson Computer Laboratory, University Hospitals Birmingham NHS Foundation  
28  
29 Trust, Birmingham, UK.  
30  
31 4. Research Institute for Primary Care and Health Sciences, Keele University, UK.  
32  
33 5. Institute of Applied Health Research, University of Birmingham, UK  
34  
35 6. Independent Research Consultant, Brussels, Belgium.  
36  
37 7. School of Pharmacy, University of London, UK.  
38  
39 8. Department of Rheumatology, St Georges University Hospital NHS Foundation Trust,  
40  
41 London, UK.  
42  
43 9. Department of Rheumatology, Derby Hospitals NHS Foundation Trust, Derby, UK.  
44  
45 10. Department of Rheumatology, Sandwell and West Birmingham Hospitals NHS Trust,  
46  
47 Birmingham, UK.  
48  
49  
50  
51  
52  
53  
54  
55  
56  
57  
58  
59  
60

1  
2  
3 **Word Count** (excluding title page, abstract, references, figures and tables): 2499  
4  
5  
6  
7

8  
9 **Keywords**

10  
11 Rheumatoid arthritis; patient delay; Primary care delay; help-seeking; access to care;  
12  
13  
14  
15  
16  
17  
18  
19  
20  
21  
22  
23  
24  
25  
26  
27  
28  
29  
30  
31  
32  
33  
34  
35  
36  
37  
38  
39  
40  
41  
42  
43  
44  
45  
46  
47  
48  
49  
50  
51  
52  
53  
54  
55  
56  
57  
58  
59  
60

For peer review only

**Strengths of this study.**

This study surveyed a large sample of patients with new onset rheumatoid arthritis in the UK to identify delays in access to care.

This study identified that approximately 20% of patients saw a rheumatologist within 12 weeks of symptom onset, and factors associated with slower self-referral and slower GP referral were identified.

**Limitations of this study.**

Data was collected at the point of diagnosis from multiple sources including medical records and patient recall, future research should examine those at risk and follow their journey to diagnosis to avoid the limitations of retrospective data collection.

This research has identified factors associated with delays, however, further research is needed to identify factors which would speed up self-referral, GP referral and hospital waiting times for those experiencing early symptoms.

**Abstract**

Objective: To investigate delays to rheumatology assessment for patients with a new onset of rheumatoid arthritis (RA)

Methods: Newly presenting adults with either RA or unclassified arthritis were recruited from rheumatology clinics. Data on the length of time between symptom onset and first seeing a GP (patient delay), between first seeing a GP and being referred to a rheumatologist (primary care delay) and being seen by a rheumatologist following referral (secondary care delay) were captured.

Results: 822 patients participated (563 female, mean age 55 years). The median time between symptom onset and seeing a rheumatologist was 27.2 weeks (IQR 14.1–66 weeks); only 20% of patients were seen within the first 3 months following symptom onset. The median patient delay was 5.4 weeks (IQR 1.4–26.3 weeks). Patients who purchased over the counter medications or used ice/heat packs took longer to seek help. In addition, those with a palindromic or an insidious symptom onset delayed for longer. The median primary care delay was 6.9 weeks (IQR 2.3–20.3 weeks). Patients made a mean of 4 GP visits before being referred. The median secondary care delay was 4.7 weeks (IQR 2.9–7.5 weeks).

Conclusion: This study identified delays at all levels in the pathway towards assessment by a Rheumatologist. However, delays in primary care were particularly long. Patient delay was driven by the nature of symptom onset. Complex multi-faceted interventions to promote rapid help seeking and to facilitate prompt onward referral from primary care should be developed.

**Introduction:**

Rheumatoid arthritis (RA) is a chronic inflammatory disease affecting approximately 1% of the population.<sup>1;2</sup> Rheumatoid arthritis is associated with significant morbidity and reduced life expectancy, in large part as a consequence of extra-articular co-morbidities associated with systemic inflammation. In the UK it has been estimated that RA costs the NHS around £560 million per year and that additional costs to the economy of sick leave and work-related disability total £1.8 billion per year.<sup>3</sup> The first three months following the onset of RA symptoms represents an important therapeutic window.<sup>4</sup> Treatment during this phase improves long-term clinical outcomes, increasing the proportion of patients whose disease enters remission, reducing RA related joint damage and reducing the eventual need for joint replacement surgery.<sup>5-10</sup> Therefore, it is vital that patients are seen by Rheumatologists rapidly following the onset of RA symptoms. However, despite increased recognition of the benefits of early treatment there remains considerable delay between symptom onset and the initiation of therapy.<sup>11-13</sup> Indeed a report by the UK's National Audit Office (NAO) in 2009 estimated that only 10% of patients with RA were treated within three months of symptom onset. The NAO's modelling suggested significant financial benefits for the broader economy and quality of life benefits for the individual if the proportion of patients treated earlier was increased.<sup>3</sup>

The patient's pathway to care can be delayed for a number of reasons, including delays on the part of the patient in recognising the significance of the early symptoms of RA.<sup>14-16</sup>

Recent research has linked patients' perceptions of RA and coping styles to the length of

1  
2  
3 time taken to seek help.<sup>17</sup> Before seeking medical help from a physician, patients may seek  
4  
5 help from a range of services including complementary therapists, pharmacists and  
6  
7 telephone and on-line services. However, the use of these services at the onset of  
8  
9 inflammatory arthritis has not been fully explored. Primary healthcare professionals often  
10  
11 find the early symptoms of RA difficult to distinguish from those of other rheumatic  
12  
13 diseases, making timely and appropriate referrals to rheumatologists challenging.<sup>18;19</sup> There  
14  
15 may thus be delays in healthcare professionals making a referral to a Rheumatologist and  
16  
17 also in assessment at the secondary care level, contributing further to the delay in making a  
18  
19 diagnosis and commencing appropriate therapy.  
20  
21  
22  
23  
24  
25

26 Several studies conducted across a range of countries have shown long delays between the  
27  
28 onset of symptoms and a patient's first consultation with a rheumatologist.<sup>20-23</sup> However,  
29  
30 data related to lengths of time between the onset of inflammatory musculoskeletal  
31  
32 symptoms and first seeing a GP, between first seeing a GP and being referred to a  
33  
34 rheumatologist and being seen by a rheumatologist following referral are not yet available  
35  
36 across multiple NHS Trusts in multiple regions of the UK.  
37  
38  
39  
40  
41

## 42 **Aim**

43  
44 The aim of this study was to investigate the extent of delay in assessment of patients with  
45  
46 RA in England and Scotland. Specifically the study assessed lengths of delay at pre-primary  
47  
48 care, primary care and secondary care levels, exploring the relationships between lengths of  
49  
50 delay and demographic variables and capturing data relating to sources of information, help  
51  
52 and advice utilized by patients prior to GP consultation.  
53  
54  
55  
56  
57  
58  
59  
60



## Methods

A questionnaire based survey of consecutively presenting patients with a new onset of RA or unclassified inflammatory arthritis was undertaken in England and Scotland. Networks such as the Early Rheumatoid Arthritis Network and Clinical Research Network were used identify Rheumatology centres to participate in this study. RJS also promoted the study during abstract presentations at British Society for Rheumatology meetings.

Data were collected from Rheumatology departments in 34 NHS Trusts. Rheumatology departments were secondary care based, although one rheumatology department operated clinics in both hospital and community settings. Eligible patients were recruited on their first or second visit to the rheumatology department following a primary care referral. Rheumatologists were asked to approach consecutively presenting patients who met the eligibility criteria. Eligible patients were newly referred adults (aged  $\geq 18$  years) with clinically apparent synovial swelling of one or more joints who had either a new onset of RA (according to 2010 ACR / EULAR criteria<sup>24</sup>) or unclassified arthritis (UA; defined as a failure to fulfil classification criteria for another inflammatory rheumatic disease). Patients with UA were recruited, as in many cases patients with UA at initial secondary care assessment progress to RA over time.<sup>25</sup>

Data were collected using two questionnaires. First, following consent, the recruiting healthcare professional completed a brief questionnaire that captured data on extents of delays between [1] symptom onset and seeing a healthcare professional (from herein referred to as 'patient delay', these data was gathered from the patient's account by the recruiting healthcare professional), [2] seeing a healthcare professional and being referred

1  
2  
3 to a rheumatologist (from herein referred to as 'primary care delay', these data was  
4  
5 gathered from the patient's account by the recruiting healthcare professional), and [3] being  
6  
7 referred to a rheumatologist and seeing a rheumatologist (from herein referred to as  
8  
9 'secondary care delay', these data were gathered from referral letters and hospital notes).  
10  
11 Data were also collected on demographic variables including the patient's age, gender,  
12  
13 education, employment status and postcode; deprivation ranks were calculated from  
14  
15 postcode data using Geoconvert 2010 which produced an Index of Multiple Deprivation  
16  
17 (IMD) score.<sup>26</sup> Data were gathered on the mode and rapidity of symptom onset  
18  
19 (palindromic (defined as intermittent symptoms) vs. non-palindromic and acute vs.  
20  
21 insidious). In addition, clinical data relating to duration of morning stiffness, swollen and  
22  
23 tender joint counts, Disease Activity Score 28 (DAS28) and fulfilment of 2010 ACR/EULAR  
24  
25 criteria for classification of RA<sup>24</sup> were collected at the time of assessment in secondary care.  
26  
27 Questionnaires were returned to a named researcher (RJS) at the University of Birmingham  
28  
29 for data entry and analysis using SPSS.<sup>27</sup>  
30  
31  
32  
33  
34  
35  
36

37 Patients were asked to provide data on actions taken in relation to their symptoms prior to  
38  
39 seeking help in primary care as part of a separate patient completed questionnaire. The  
40  
41 questions included in that questionnaire were informed by previous qualitative research,  
42  
43 including patient interviews and interviews with healthcare professionals. In addition, we  
44  
45 had input from Patient Research Partners and the questions asked were validated and  
46  
47 assessed for reliability<sup>28</sup>.  
48  
49  
50  
51  
52  
53  
54  
55  
56  
57  
58  
59  
60

## Analysis

To ensure that the data met parametric assumptions, the distribution and levels of multicollinearity between variables were checked. Data on patient, primary care and secondary care delays were not normally distributed, therefore, log values of these delay data were created to generate normally distributed variables.

An Analysis of Variance assessed the main effects and two-way interactions for patient delay, primary care delay and secondary care delay between the following variables: gender, ethnicity, IMD score, age, education, employment status, palindromic onset, acute onset, patient reported family history of RA, and RA vs. UA. Two-way interactions which were not significant were removed in a backwards stepwise fashion, with the pairings with the highest p values being removed first, but all main effects were retained, so that the final model included all ten explanatory variables and any significant two-way interactions ( $p < 0.01$ ).

## Results

### 1. Participant characteristics

Data were collected from 856 patients between 2011 and 2014. Patients were withdrawn from the study due to incomplete data (21 cases) and ineligibility (13 cases in whom there was no clinical synovitis reported at recruitment). Data were thus analysed from 822 patients of whom 68.5% were female with a mean age of 55 years. Characteristics of patients are presented in table 1.

**Table 1:** Demographic and disease related characteristics of patients . Data are presented as either percentage (number) or median (IQR) as appropriate. Tender joint count is out of 42 joints (10 PIP, 10 MCP, 2 wrist, 2 elbow, 2 shoulder, 2 hip, 2 knee, 2 ankle, 10 MTP). Swollen joint count is out of 40 joints (10 PIP, 10 MCP, 2 wrist, 2 elbow, 2 shoulder, 2 knee, 2 ankle, 10 MTP).

|                                        |                   |
|----------------------------------------|-------------------|
| Female                                 | 68.5% (563)       |
| Age, years                             | 57 (45-67)        |
| Diagnosis of RA                        | 43% (368)         |
| Ethnicity:                             |                   |
| Black British                          | 6.0% (49)         |
| South Asian                            | 7.7% (63)         |
| White British                          | 84.9% (698)       |
| Other                                  | 1.5% (12)         |
| Self-reported family history of RA     | 34.9% (287)       |
| Palindromic onset                      | 42.8% (352)       |
| Acute onset                            | 35.9% (295)       |
| Duration of morning stiffness, minutes | 60 (10-120)       |
| DAS28                                  | 4.88 (3.98 -5.80) |

|                     |                  |
|---------------------|------------------|
| HAQ                 | 1.13 (0.50-1.73) |
| Tender joint count  | 9 (4-18)         |
| Swollen joint count | 5 (2-10)         |

## **2. Intervals between symptom onset and first rheumatology consultation**

Overall the median time between symptom onset and seeing a rheumatologist was 27.2 weeks (IQR 14.1 – 66 weeks); only 20% of patients were seen within the first 3 months following symptom onset. The median patient delay was 5.4 weeks (IQR 1.4-26.3 weeks). The median primary care delay was 6.9 weeks (IQR 2.3–20.3 weeks) with patients making a mean of 4 GP visits before being referred. The median secondary care delay was 4.7 weeks (IQR 2.9–7.5 weeks). Data are shown in Figure 1.

Patients with a palindromic symptom onset had a significantly longer patient delay than those with a non-palindromic onset (9.3 weeks (IQR 2-43 weeks) vs 4.3 weeks (IQR 1-17 weeks);  $p < 0.001$ , t-test). Furthermore, those with an acute symptom onset had significantly shorter patient delays than those with an insidious symptoms onset (2.4 weeks (IQR 1 - 6.6 weeks) vs 11.1 weeks (IQR 4-44 weeks;  $p < 0.001$ , t-test).

*Resources used before seeking help from primary care*

Patients reported taking a range of actions in relation to their symptoms before seeking help from their GP and in some cases these actions were associated with longer delays in GP consultation (see table 2). Most often patients reported purchasing tablets from 'the chemist', although only a small proportion actually reported speaking to a pharmacist. Other actions reported by patients included applying heat or cold packs to joints or buying joint supports.

**Table 2.** *Actions taken by patients with inflammatory arthritis before seeking help from their GP with comparison made for patient delay between those who did and did not undertake this action using independent t-tests; \* P value for comparison of those who did and did not undertake this action.*

| <b>Actions taken before seeking help from GP</b> | <b>% (number) of participants undertaking this action</b> | <b>Median (IQR) patient delay in weeks for those undertaking this action</b> | <b>Median (IQR) patient delay in weeks for those not undertaking this action</b> | <b>P value</b> |
|--------------------------------------------------|-----------------------------------------------------------|------------------------------------------------------------------------------|----------------------------------------------------------------------------------|----------------|
| Bought tablets from the chemist                  | 51.1%<br>(273 out of 534)                                 | 6.9 (2-30.7)                                                                 | 4.7 (1.4-23)                                                                     | p=0.036        |
| Used an ice or heat pack on joint                | 47.8%<br>(254 out of 531)                                 | 7.6 (2-30.3)                                                                 | 4.9 (2-26.1)                                                                     | p=0.045        |
| Took baths                                       | 47.4%<br>(251 out of 529)                                 | 6.3 (2-30.4)                                                                 | 5.6 (2-26.1)                                                                     | p=0.473        |
| Bought joint supports                            | 37.4%                                                     | 4.4 (2.1-18.6)                                                               | 5.1 (2-26.9)                                                                     | p=0.362        |

|                                                |                           |                |              |          |
|------------------------------------------------|---------------------------|----------------|--------------|----------|
| (splints, tubi-grips<br>etc)                   | (198 out of 529)          |                |              |          |
| Used alternative<br>therapies                  | 25.2%<br>(134 out of 531) | 8.3 (2-42.1)   | 5.3 (2-26.3) | p=0.020  |
| Bought products<br>from a health shop          | 19.0%<br>(101 out of 532) | 5.9 (2-36.3)   | 5.9 (2-26)   | p=0.182  |
| Modified diet                                  | 14.4%<br>(76 out of 529)  | 6 (2.1-35.3)   | 6.1(2-26.3)  | p= 0.183 |
| Used prayer or<br>sought spiritual<br>guidance | 8.4%<br>(45 out of 534)   | 4.4 (2.1-18.6) | 6.3 (2-26.9) | p=0.941  |
| Spoke to a<br>pharmacist                       | 7.9%<br>(41 out of 521)   | 5.9 (2-38.1)   | 5.9 (2-26.3) | p=0.544  |

Thirty-seven percent of patients reported looking on the internet (for example visiting the NHS direct website, BUPA website, Arthritis Research UK website and searching for information using search engines such as Google). Patients also reported seeking support via a telephone helpline; 5.7% described calling the NHS direct helpline or another telephone health advice service. Whilst, in the vast majority of cases, the GP was the first healthcare professional consulted by the patient, 3.7% sought help in the workplace (e.g. from an occupational nurse), 2% of patients went directly to A&E and 1% attended an NHS walk-in centre.

**Multivariate analysis: Patient delay**

The interaction model showed main effects for mode of onset (palindromic vs. non-palindromic;  $F=26.65$ ,  $P<0.01$ ) and rapidity of onset (acute vs. insidious;  $F= 65.36$ ,  $P<0.01$ ).

An interaction was found between mode of onset and gender ( $F=45.658$ ,  $P<0.01$ ); men with a palindromic onset waited for longer before seeking help (Figure 2).



**Multivariate analysis: GP delay**

A main effect was found for ethnicity ( $F=6.26$ ,  $P<0.01$ ). Significant differences in primary care delay were found between White British and South Asian patients (6.2 weeks (IQR 2-18.6) vs 22 weeks (IQR 6.5-39.8);  $P<0.001$ ) and between White British and Black British patients (6.2 weeks (IQR 2-18.6) vs 11.1 weeks (IQR 4.3-21.7);  $P<0.001$ ). No significant difference was found between South Asian and Black British patients ( $P=1.000$ ).

A main effect was also found for family history ( $F=5.89$ ,  $P<0.01$ ); the median primary care delay for those with a self-reported family history of RA was 9 weeks (IQR 2.4-25.7), while primary care delay for those with no family history was 6.3 weeks (IQR 2.3-19). Interactions at a statistically significant level ( $<0.01$ ) were not found.

**Multivariate analysis: Secondary care delay**

The original model included main effects and two-way interactions for the following explanatory variables: gender, ethnicity, IMD score, age, education, employment status, mode of onset, rapidity of onset, family onset and RA vs. UA. None of the main effects or interactions (when removed backwards) were significant in predicting the delay between referral and being seen in secondary care.

## Discussion

International guidelines recommend that the treatment of RA should begin as soon as possible after the onset of symptoms, ideally aiming to capture patients within the first 3 months following symptom onset. However, this large UK study of delays in access to care for RA patients found that the median patient delay in seeking help at the onset of symptoms was 5.4 weeks, while the median delay between seeing a healthcare professional and being referred was 6.9 weeks. Our study highlights that only 20% of patients were seen within the first 3 months of symptom onset. This appears to be much lower than the rate reported in other European countries for example a recent study in Austria reported at 38% of patients were seen within the first 3 months<sup>29</sup>. The present study also found an average delay of 4.7 weeks from referral until the patient was seen by a rheumatologist, similar to figures reported in the NOA report<sup>3</sup>. Unlike other some previous studies conducted in the UK,<sup>3;12</sup> we found that GP delay was the largest contributor to overall delay.

This research highlights that delays in primary care are long, and a major contributor to overall delays between symptom onset and the first rheumatology visit. General practitioners are faced with a number of barriers to identifying patients with newly presenting RA including the often non-specific nature of symptoms at the earliest stages of RA.<sup>18</sup> Research is underway to define symptom complexes most predictive of RA development in patients with newly presenting musculoskeletal symptoms and it is likely that a combination of education, and evidence based referral algorithms, will be needed to ensure that suspected cases are referred early. For example, in Fife, Scotland GPs do not have access to rheumatoid factor testing, and use guidelines with pictorial representations

1  
2  
3 to help identify early synovitis (personal communication Dr Helen Harris). Fife was a  
4  
5 participating centre in this study, and was found to have the lowest GP referral time of all  
6  
7 centres surveyed. Furthermore, facilitating access to secondary care, for example through  
8  
9 the establishment of rapid assessment clinics whose main aim is to identify whether the  
10  
11 patient does or does not have synovitis have been shown to significantly reduce delays in  
12  
13 the assessment of patients.<sup>30</sup> A limitation of our research is that the study was not able to  
14  
15 assess regional differences across NHS Trust in England and Scotland. A study comparing  
16  
17 delays and referral patterns between NHS Trusts with local policies and practices which may  
18  
19 influence the time between onset and first consultation would be welcome.  
20  
21  
22  
23  
24  
25

26 A number of factors were found to influence GP delay, including ethnicity and deprivation.  
27  
28 Studies in the field of oncology have also found that people from ethnic minority  
29  
30 backgrounds face longer GP delays,<sup>31;32</sup> and that GPs working in more deprived communities  
31  
32 take longer to make referrals.<sup>33</sup> In the context of RA it is possible that the early  
33  
34 symptomatology of patients from ethnic minority backgrounds is different from, and less  
35  
36 typical of RA than that of, patients of white British background, thus making recognition  
37  
38 more challenging for GPs. Data certainly exist that the clinical phenotype of established RA  
39  
40 differs in patients of South Asian origin compared with patients of White British origin,<sup>34</sup>  
41  
42 though data relating the clinical presentations of RA in these groups are lacking.  
43  
44  
45 Furthermore, it is unclear why a self-reported family history of RA would be associated with  
46  
47 longer delays although it is important to recognise that GPs may not have elicited this  
48  
49 information from the patient.<sup>35</sup>  
50  
51  
52  
53  
54  
55  
56  
57  
58  
59  
60

1  
2  
3 Previous qualitative studies and a meta-synthesis have identified barriers to help seeking at  
4  
5 the onset of RA.<sup>36-39</sup> The present study identifies that before seeking formal medical  
6  
7 attention, people experiencing the early symptoms of RA seek information and help from a  
8  
9 number of alternative sources and often self-medicate. We identified that buying tablets  
10  
11 from a pharmacy, and using heat or ice on joints was significantly associated with longer  
12  
13 patient delays. This finding highlights that some self-management behaviours, particularly  
14  
15 those linked to accessing pharmacy services can negatively impact on the time it takes to  
16  
17 seek help; this needs further exploration. Factors previously suggested to be associated  
18  
19 with delays in GP consultation included an insidious onset of mild symptoms and a lack of  
20  
21 knowledge about RA, personal susceptibility to RA and the availability of treatments to slow  
22  
23 disease progression. In our national sample 64.1% of people describe an insidious onset of  
24  
25 RA, and 42.8% describe a palindromic onset of RA. Therefore, the majority of patients  
26  
27 surveyed experienced a slow and / or intermittent onset of their RA symptoms. Our  
28  
29 quantitative data are thus consistent with results from qualitative studies, demonstrating  
30  
31 that the mode and rapidity of onset of symptoms is significantly associated with patient  
32  
33 delays.  
34  
35  
36  
37  
38  
39  
40  
41

42 Whilst delays in primary care are the largest contributor to overall delay, patient delay and  
43  
44 secondary care delay represent important components. This study found that the nature of  
45  
46 symptoms onset influenced how quickly patients with RA sought help, suggesting that those  
47  
48 with an acute onset of persistent symptoms seek help faster than those with insidious and  
49  
50 palindromic onsets. Interventions to encourage rapid help seeking should consider  
51  
52 highlighting the frequently insidious onset of RA to members of the public stressing that  
53  
54 help should be sought even when symptoms are mild.  
55  
56  
57  
58  
59  
60

1  
2  
3  
4  
5 Interventions at multiple levels, including at the levels of the public, the services which the  
6  
7 public consult after the onset of symptoms (e.g. pharmacies), primary care and secondary  
8  
9 care will be needed to reduce overall delays in access to appropriate specialists.  
10  
11

### 12 13 14 15 **Limitations**

16  
17  
18 This study has a number of limitations. Firstly, the interval between first consultation with a  
19  
20 Rheumatologist and initiation of disease modifying anti-rheumatic drug (DMARD) treatment  
21  
22 was not measured. Any additional delay in commencing DMARD treatment will negatively  
23  
24 impact the patient and variables associated with delays at this level should be assessed in  
25  
26 future studies.  
27  
28

29  
30 During the course of this study a number of guidelines were published which may have  
31  
32 influenced practice, and patterns of referral. However, the rate of recruitment over time  
33  
34 was not controlled e.g. at the start of the study recruitment was slow, and then increased  
35  
36 later as more centres participated. Future investigation should assess the impact of policy  
37  
38 changes on patterns of help-seeking, referral and assessment.  
39  
40  
41

42  
43 The rheumatology centres participating in this study were self-selecting, therefore, there  
44  
45 may be biases in the characteristics of the rheumatology centres which participated in this  
46  
47 study. For example, the participating rheumatology units may have had a particular interest  
48  
49 in early arthritis. Only a study which recruited consecutive patients from all rheumatology  
50  
51 units across the UK would be able to provide a truly national picture.  
52  
53  
54  
55  
56  
57  
58  
59  
60

1  
2  
3 Data relating to the onset of symptoms and initial GP consultation were gathered from  
4  
5 patients' histories, and therefore relied on patient recollection. However, a previous study  
6  
7 addressing delay in patients with RA, has highlighted the accuracy of patient recollection by  
8  
9 comparing patient accounts of their journey to first rheumatology consultation against  
10  
11 medical records<sup>40</sup>.  
12  
13  
14  
15  
16  
17  
18  
19  
20  
21  
22  
23  
24  
25  
26  
27  
28  
29  
30  
31  
32  
33  
34  
35  
36  
37  
38  
39  
40  
41  
42  
43  
44  
45  
46  
47  
48  
49  
50  
51  
52  
53  
54  
55  
56  
57  
58  
59  
60

### Competing interests

No competing Interest:

### Contributorship

All authors made substantial contributions to the conception or design of the work. The acquisition of data was undertaken by RJS, KR, PK and CD. The analysis and interpretation of data were undertaken by RJS, PN and KR. All authors were involved in drafting the work and revising it critically for important intellectual content. All authors gave final approval of the version published. All authors agree to be accountable for all aspects of the work in ensuring that questions related to the accuracy or integrity of any part of the work are appropriately investigated and resolved.

### Acknowledgements

We would like to thank the staff at the rheumatology departments who collected data for this study.

### Funding information

CJ and CDM are part-funded by the NIHR Collaborations for Leadership in Applied Health Research and Care West Midlands. RH is part-funded by North Thames CLAHRC and his contribution was also supported by an NIHR Senior Investigator Award. KS is funded by the NIHR CLAHRC West Midlands initiative. This article presents independent research funded in part by the National Institute for Health Research (NIHR) under the Research for Patient Benefit Programme (funder's reference PB-PG-1208-18114). The views expressed in this publication are those of the authors and not necessarily those of the NHS, the NIHR or the Department of Health.

**Ethical approval information** Ethical approval was obtained from South Birmingham Research Ethics Committee (reference no. 10/H1207/98) and all participants gave written informed consent.

### Data sharing statement

Data are available upon request from the corresponding author.

**Non-author contributors - Delay study syndicate**

Sandwell and West Birmingham Hospitals NHS Trust: Biruk Asfaw, Sabrina Kapoor, Kanta

Kumar, Adam Slater & Christopher Buckley

Derby Teaching Hospitals NHS Foundation Trust: Chris Deighton & Alison Booth

Nottingham University Hospitals NHS Trust: Marie-Josophe Pradere, Ira Pande & Ian

Gaywood

St George's University Hospitals NHS Trust: Francesca Leone & Patrick Keily

Lancaster Teaching Hospitals NHS Foundation Trust: Bronwen Evans & Marwan Bukhari

Poole Hospitals NHS Foundation Trust: Julia Taylor, Helena Knowles, & Sarah Westlake

University Hospitals Coventry and Warwickshire NHS Trust: Tanya Potter

Sherwood Forest Hospitals NHS Foundation Trust: Debbie Wilson, Jayne Smith & David

Walsh

King's College Hospitals NHS Foundation Trust: Nyarko Ahwireng, Audu Aderonke & David

Scott

Guy's and St Thomas NHS Foundation Trust: Louise Nel, Naomi Hare & Andrew Cope

North Bristol NHS Trust: Julie Taylor, Wendy Wilmott & Paul Creamer

West Hertfordshire Hospitals NHS Trust: Lynn Currie, Adam Young & Karen Markwell

Lewisham and Greenwich NHS Trust: Louise Pollard & Debbie Johnson

Royal Surrey Country NHS Foundation Trust: Stephanie Allen & Raad Makadsi

Hampshire Hospitals NHS Foundations Trust: Peter Prouse & Janet Cushnaghan

University Hospitals of Leicester NHS Trust: Jessy Sabu & Moorthy Arumugam

County Durham and Darlington NHS Foundation Trust: Matt Bridges & Pam Race

Weston Area Health NHS Trust: Dawn Symonds & Matt Bridges

University Hospitals Birmingham NHS Foundation Trust: Jackie Cobb, Andrew Filer, Simon

Bowman & Paresh Jobanputra

Royal Wolverhampton Hospital NHS Trust (at the time of recruitment the hospital from which patients were recruited was within the Mid Staffordshire NHS Foundation Trust) :

Julie Edwards & Tom Sheeran

East Kent Hospitals University NHS Foundation Trust: Caroline Crowley & Imad Jassim

University Hospitals of the North Midlands NHS Trust: Julie Gray & Jon Packham



1  
2  
3 NHS Fife: Paul Allcoat & Helen Harris

4 Yeovil District Hospital NHS Foundation Trust: Rebecca Rowland & Sally Knights

5  
6 Northumbria Healthcare NHS Foundation Trust AND The Newcastle Upon Tyne Hospitals

7  
8 NHS Foundation Trust: Peta Heslop, Sandra Robinson, David Walker, Heather Russell &

9  
10 Sheryl Mitchell

11  
12 Chesterfield Royal Hospital NHS Foundation Trust: Heather Cripps & Kevin Fairburn

13  
14 Lancashire Teaching Hospitals NHS Foundation Trust AND East Lancashire Hospital NHS

15  
16 Trust: Sue Cotterell, Gillian Welch, Ayesha Madan & Lee Suan Teh

17  
18 Cambridge University Hospitals NHS Foundation Trust: Lucy Winstanley & Shweta Bhagat

19  
20 The Dudley Group NHS Foundation Trust: Lucy Kadiki, Chitra Ramful & Ravinder Sandhu

21  
22 Royal Cornwall Hospitals NHS Trust: Amanda Datson, & Anthony Woolf

## Reference List

- (1) Humphreys JH, Verstappen SM, Hyrich KL, Chipping JR, Marshall T, Symmons DP. The incidence of rheumatoid arthritis in the UK: comparisons using the 2010 ACR/EULAR classification criteria and the 1987 ACR classification criteria. Results from the Norfolk Arthritis Register. *Ann Rheum Dis* 2012; 72(8):1315-1320.
- (2) Symmons D, Turner G, Webb R, Asten P, Barrett E, Lunt M et al. The prevalence of rheumatoid arthritis in the United Kingdom: new estimates for a new century. *Rheumatology (Oxford)* 2002; 41(7):793-800.
- (3) National Audit Office. Services for people with rheumatoid arthritis. National Audit Office . 2009. London, The Stationery Office. 24-1-2013.  
Ref Type: Report
- (4) van Nies JA, Tsonaka R, Gaujoux-Viala C, Fautrel B, van der Helm-van Mil AH. Evaluating relationships between symptom duration and persistence of rheumatoid arthritis: does a window of opportunity exist? Results on the Leiden Early Arthritis Clinic and ESPOIR cohorts. *Ann Rheum Dis* 2015; 74(5):806-812.
- (5) Feldman DE, Bernatsky S, Houde M, Beauchamp ME, Abrahamowicz M. Early consultation with a rheumatologist for RA: does it reduce subsequent use of orthopaedic surgery? *Rheumatology (Oxford)* 2013; 52(3):452-459.
- (6) Nell VP, Machold KP, Eberl G, Stamm TA, Uffmann M, Smolen JS. Benefit of very early referral and very early therapy with disease-modifying anti-rheumatic drugs in patients with early rheumatoid arthritis. *Rheumatology (Oxford)* 2004; 43(7):906-914.
- (7) Raza K, Buckley CE, Salmon M, Buckley CD. Treating very early rheumatoid arthritis. *Best Pract Res Clin Rheumatol* 2006; 20(5):849-863.
- (8) Raza K, Filer A. The therapeutic window of opportunity in rheumatoid arthritis: does it ever close? *Ann Rheum Dis* 2015; 74(5):793-794.
- (9) Scott DL, Hunter J, Deighton C, Scott DG, Isenberg D. Treatment of rheumatoid arthritis is good medicine. *BMJ* 2011; 343:d6962.
- (10) van der Linden MP, le Cessie S, Raza K, van der Woude D, Knevel R, Huizinga TW et al. Long-term impact of delay in assessment of patients with early arthritis. *Arthritis Rheum* 2010; 62(12):3537-3546.
- (11) Feldman DE, Bernatsky S, Haggerty J, Leffondre K, Tousignant P, Roy Y et al. Delay in consultation with specialists for persons with suspected new-onset rheumatoid arthritis: a population-based study. *Arthritis Rheum* 2007; 57(8):1419-1425.
- (12) Kiely P, Williams R, Walsh D, Young A. Contemporary patterns of care and disease activity outcome in early rheumatoid arthritis: the ERAN cohort. *Rheumatology (Oxford)* 2009; 48(1):57-60.

- 1
- 2
- 3 (13) Kumar K, Daley E, Carruthers DM, Situnayake D, Gordon C, Grindulis K et al. Delay in
- 4 presentation to primary care physicians is the main reason why patients with rheumatoid
- 5 arthritis are seen late by rheumatologists. *Rheumatology (Oxford)* 2007; 46(9):1438-1440.
- 6
- 7 (14) Stack RJ, Simons G, Kumar K, Mallen CD, Raza K. Patient delays in seeking help at the onset
- 8 of rheumatoid arthritis: the problem, its causes and potential solutions. *Aging Health* 2013;
- 9 9(4):425-435.
- 10
- 11 (15) Oliver S, Bosworth A, Airoidi M, Bunyan H, Callum A, Dixon J et al. Exploring the healthcare
- 12 journey of patients with rheumatoid arthritis: a mapping project - implications for practice.
- 13 *Musculoskeletal Care* 2008; 6(4):247-266.
- 14
- 15 (16) Villeneuve E, Nam JL, Bell MJ, Deighton CM, Felson DT, Hazes JM et al. A systematic
- 16 literature review of strategies promoting early referral and reducing delays in the diagnosis
- 17 and management of inflammatory arthritis. *Ann Rheum Dis* 2012; 27(1):13-22.
- 18
- 19 (17) Van der Elst K, De CD, Vecoven E, Arat S, Meyfroidt S, Joly J et al. Are illness perception and
- 20 coping style associated with the delay between symptom onset and the first general
- 21 practitioner consultation in early rheumatoid arthritis management? An exploratory study
- 22 within the CareRA trial. *Scand J Rheumatol* 2015;1-8.
- 23
- 24 (18) Stack RJ, Llewellyn Z, Deighton C, Kiely P, Mallen CD, Raza K. General practitioners'
- 25 perspectives on campaigns to promote rapid help-seeking behaviour at the onset of
- 26 rheumatoid arthritis. *Scand J Prim Health Care* 2014; 32(1):37-43.
- 27
- 28 (19) Stack RJ, Shani M, Mallen CD, Raza K. Symptom complexes at the earliest phases of
- 29 rheumatoid arthritis: a synthesis of the qualitative literature. *Arthritis Care Res* 2013;
- 30 65(12):1916-1926.
- 31
- 32 (20) De CD, Meyfroidt S, Joly J, Van der Elst K, Westhovens R, Verschueren P. A detailed analysis
- 33 of treatment delay from the onset of symptoms in early rheumatoid arthritis patients. *Scand*
- 34 *J Rheumatol* 2014; 43(1):1-8.
- 35
- 36 (21) van Nies JA, Brouwer E, de Rooy DP, van Gaalen FA, Huizinga TW, Posthumus MD et al.
- 37 Reasons for medical help-seeking behaviour of patients with recent-onset arthralgia. *Ann*
- 38 *Rheum Dis* 2013; 72(8):1302-1307.
- 39
- 40 (22) Zafar S, Badsha H, Mofti A, Delosantos A, Altares J, Matudio G et al. Efforts to increase public
- 41 awareness may result in more timely diagnosis of rheumatoid arthritis. *J Clin Rheumatol*
- 42 2012; 18(6):279-282.
- 43
- 44 (23) Nanji JA, Choi M, Ferrari R, Lyddell C, Russell AS. Time to consultation and disease-modifying
- 45 antirheumatic drug treatment of patients with rheumatoid arthritis--northern Alberta
- 46 perspective. *J Rheumatol* 2012; 39(4):707-711.
- 47
- 48 (24) Aletaha D, Neogi T, Silman AJ, Funovits J, Felson DT, Bingham CO, III et al. 2010 rheumatoid
- 49 arthritis classification criteria: an American College of Rheumatology/European League
- 50 Against Rheumatism collaborative initiative. *Ann Rheum Dis* 2010; 69(9):1580-1588.
- 51
- 52 (25) van der Helm-van Mil AH, Detert J, le Cessie S, Filer A, Bastian H, Burmester GR et al.
- 53 Validation of a prediction rule for disease outcome in patients with recent-onset
- 54 undifferentiated arthritis: moving toward individualized treatment decision-making. *Arthritis*
- 55 *Rheum* 2008; 58(8):2241-2247.
- 56
- 57
- 58
- 59
- 60

- 1  
2  
3 (26) Midas. GeoConvert. <http://geoconvert.mimas.ac.uk>. 2010.  
4 Ref Type: Online Source  
5  
6 (27) IBM SPSS Statistics for Windows [ Armonk, NY: IBM Corp; 2015.  
7  
8 (28) Stack RJ, Mallen CD, Deighton C, Kiely P, Shaw KL, Booth A et al. The development and initial  
9 validation of a questionnaire to measure help-seeking behaviour in patients with new onset  
10 rheumatoid arthritis. *Health Expect* 2014; Jun(3):1-10.  
11  
12 (29) Puchner R, Janetschko R, Kaiser W, Linkesch M, Steininger M, Termetsberger R et al. Efficacy  
13 and Outcome of Rapid Access Rheumatology Consultation: An Office-based Pilot Cohort  
14 Study. *Journal of Rheumatology* 2016; 43(6):1130-1135.  
15  
16 (30) van Nies JA, Brouwer E, van Gaalen FA, Allaart CF, Huizinga TW, Posthumus MD et al.  
17 Improved early identification of arthritis: evaluating the efficacy of Early Arthritis  
18 Recognition Clinics. *Ann Rheum Dis* 2012; 72(8):1295-301.  
19  
20 (31) Richardson JL, Langholz B, Bernstein L, Burciaga C, Danley K, Ross RK. Stage and delay in  
21 breast cancer diagnosis by race, socioeconomic status, age and year. *Br J Cancer* 1992;  
22 65(6):922-926.  
23  
24 (32) Smith EC, Ziogas A, Anton-Culver H. Delay in surgical treatment and survival after breast  
25 cancer diagnosis in young women by race/ethnicity. *JAMA Surg* 2013; 148(6):516-523.  
26  
27 (33) Macleod U, Mitchell ED, Burgess C, Macdonald S, Ramirez AJ. Risk factors for delayed  
28 presentation and referral of symptomatic cancer: evidence for common cancers. *Br J Cancer*  
29 2009; 101 Suppl 2:S92-S101.  
30  
31 (34) Griffiths B, Situnayake RD, Clark B, Tennant A, Salmon M, Emery P. Racial origin and its effect  
32 on disease expression and HLA-DRB1 types in patients with rheumatoid arthritis: a matched  
33 cross-sectional study. *Rheumatology (Oxford)* 2000; 39(8):857-864.  
34  
35 (35) Simons G, Mallen CD, Kumar K, Stack RJ, Raza K. A Qualitative Investigation of the Barriers to  
36 Help-seeking Among Members of the Public Presented with Symptoms of New-onset  
37 Rheumatoid Arthritis. *J Rheumatol* 2015; 42(4):585-592.  
38  
39 (36) Kumar K, Daley E, Khattak F, Buckley CD, Raza K. The influence of ethnicity on the extent of,  
40 and reasons underlying, delay in general practitioner consultation in patients with RA.  
41 *Rheumatology (Oxford)* 2010; 49(5):1005-1012.  
42  
43 (37) Sheppard J, Kumar K, Buckley CD, Shaw KL, Raza K. 'I just thought it was normal aches and  
44 pains': a qualitative study of decision-making processes in patients with early rheumatoid  
45 arthritis. *Rheumatology (Oxford)* 2008; 47(10):1577-1582.  
46  
47 (38) Stack RJ, Shaw K, Mallen C, Herron-Marx S, Horne R, Raza K. Delays in help seeking at the  
48 onset of the symptoms of rheumatoid arthritis: a systematic synthesis of qualitative  
49 literature. *Ann Rheum Dis* 2012; 71(4):493-497.  
50  
51 (39) Townsend A, Wyke S, Hunt K. Self-managing and managing self: practical and moral  
52 dilemmas in accounts of living with chronic illness. *Chronic Illn* 2006; 2(3):185-194.  
53  
54  
55  
56  
57  
58  
59  
60

1  
2  
3  
4  
5  
6  
7  
8  
9  
10  
11  
12  
13  
14  
15  
16  
17  
18  
19  
20  
21  
22  
23  
24  
25  
26  
27  
28  
29  
30  
31  
32  
33  
34  
35  
36  
37  
38  
39  
40  
41  
42  
43  
44  
45  
46  
47  
48  
49  
50  
51  
52  
53  
54  
55  
56  
57  
58  
59  
60

(40) De Cock D, Meyfroidt S, Joly J, Van der Elst K, Westhovens R, Verschueren P. A detailed analysis of treatment delay from the onset of symptoms in early rheumatoid arthritis patients. *Scand J Rheumatol* 2014; 43(1):1-8.

For peer review only

## STROBE Statement—checklist of items that should be included in reports of observational studies

|                          | Item No | Recommendation                                                                                                                                                                             |                             |
|--------------------------|---------|--------------------------------------------------------------------------------------------------------------------------------------------------------------------------------------------|-----------------------------|
| Title and abstract       | 1       | (a) Indicate the study's design with a commonly used term in the title or the abstract                                                                                                     | Yes                         |
|                          |         | (b) Provide in the abstract an informative and balanced summary of what was done and what was found                                                                                        | Yes                         |
| <b>Introduction</b>      |         |                                                                                                                                                                                            |                             |
| Background/rationale     | 2       | Explain the scientific background and rationale for the investigation being reported                                                                                                       | Yes                         |
| Objectives               | 3       | State specific objectives, including any prespecified hypotheses                                                                                                                           | Yes                         |
| <b>Methods</b>           |         |                                                                                                                                                                                            |                             |
| Study design             | 4       | Present key elements of study design early in the paper                                                                                                                                    | Yes                         |
| Setting                  | 5       | Describe the setting, locations, and relevant dates, including periods of recruitment, exposure, follow-up, and data collection                                                            | Yes                         |
| Participants             | 6       | (a) <i>Cohort study</i> —Give the eligibility criteria, and the sources and methods of selection of participants. Describe methods of follow-up                                            | Cross-sectional study - Yes |
|                          |         | <i>Case-control study</i> —Give the eligibility criteria, and the sources and methods of case ascertainment and control selection. Give the rationale for the choice of cases and controls |                             |
|                          |         | <i>Cross-sectional study</i> —Give the eligibility criteria, and the sources and methods of selection of participants                                                                      |                             |
|                          |         | (b) <i>Cohort study</i> —For matched studies, give matching criteria and number of exposed and unexposed                                                                                   |                             |
|                          |         | <i>Case-control study</i> —For matched studies, give matching criteria and the number of controls per case                                                                                 |                             |
| Variables                | 7       | Clearly define all outcomes, exposures, predictors, potential confounders, and effect modifiers. Give diagnostic criteria, if applicable                                                   | Yes                         |
| Data sources/measurement | 8*      | For each variable of interest, give sources of data and details of methods of assessment (measurement). Describe comparability of assessment methods if there is more than one group       | Yes                         |
| Bias                     | 9       | Describe any efforts to address potential sources of bias                                                                                                                                  | Yes                         |
| Study size               | 10      | Explain how the study size was arrived at                                                                                                                                                  | N/A                         |
| Quantitative variables   | 11      | Explain how quantitative variables were handled in the analyses. If applicable, describe which groupings were chosen and why                                                               | Yes                         |
| Statistical methods      | 12      | (a) Describe all statistical methods, including those used to control for confounding                                                                                                      | Yes                         |
|                          |         | (b) Describe any methods used to examine subgroups and interactions                                                                                                                        | Yes                         |

1  
2  
3  
4  
5  
6  
7  
8  
9  
10  
11  
12  
13  
14  
15  
16  
17  
18  
19  
20  
21  
22  
23  
24  
25  
26  
27  
28  
29  
30  
31  
32  
33  
34  
35  
36  
37  
38  
39  
40  
41  
42  
43  
44  
45  
46  
47  
48  
49  
50  
51  
52  
53  
54  
55  
56  
57  
58  
59  
60

(c) Explain how missing data were addressed

---

(d) *Cohort study*—If applicable, explain how loss to follow-up was addressed

*Case-control study*—If applicable, explain how matching of cases and controls was addressed

*Cross-sectional study*—If applicable, describe analytical methods taking account of sampling strategy

---

(e) Describe any sensitivity analyses

Continued on next page

For peer review only

| <b>Results</b>           |     |                                                                                                                                                                                                              |     |
|--------------------------|-----|--------------------------------------------------------------------------------------------------------------------------------------------------------------------------------------------------------------|-----|
| Participants             | 13* | (a) Report numbers of individuals at each stage of study—eg numbers potentially eligible, examined for eligibility, confirmed eligible, included in the study, completing follow-up, and analysed            | Yes |
|                          |     | (b) Give reasons for non-participation at each stage                                                                                                                                                         | Yes |
|                          |     | (c) Consider use of a flow diagram                                                                                                                                                                           | N/A |
| Descriptive data         | 14* | (a) Give characteristics of study participants (eg demographic, clinical, social) and information on exposures and potential confounders                                                                     | Yes |
|                          |     | (b) Indicate number of participants with missing data for each variable of interest                                                                                                                          | Yes |
|                          |     | (c) <i>Cohort study</i> —Summarise follow-up time (eg, average and total amount)                                                                                                                             |     |
| Outcome data             | 15* | <i>Cohort study</i> —Report numbers of outcome events or summary measures over time                                                                                                                          |     |
|                          |     | <i>Case-control study</i> —Report numbers in each exposure category, or summary measures of exposure                                                                                                         |     |
|                          |     | <i>Cross-sectional study</i> —Report numbers of outcome events or summary measures                                                                                                                           | Yes |
| Main results             | 16  | (a) Give unadjusted estimates and, if applicable, confounder-adjusted estimates and their precision (eg, 95% confidence interval). Make clear which confounders were adjusted for and why they were included | N/A |
|                          |     | (b) Report category boundaries when continuous variables were categorized                                                                                                                                    | Yes |
|                          |     | (c) If relevant, consider translating estimates of relative risk into absolute risk for a meaningful time period                                                                                             | N/A |
| Other analyses           | 17  | Report other analyses done—eg analyses of subgroups and interactions, and sensitivity analyses                                                                                                               | N/A |
| <b>Discussion</b>        |     |                                                                                                                                                                                                              |     |
| Key results              | 18  | Summarise key results with reference to study objectives                                                                                                                                                     | Yes |
| Limitations              | 19  | Discuss limitations of the study, taking into account sources of potential bias or imprecision. Discuss both direction and magnitude of any potential bias                                                   | Yes |
| Interpretation           | 20  | Give a cautious overall interpretation of results considering objectives, limitations, multiplicity of analyses, results from similar studies, and other relevant evidence                                   | Yes |
| Generalisability         | 21  | Discuss the generalisability (external validity) of the study results                                                                                                                                        | Yes |
| <b>Other information</b> |     |                                                                                                                                                                                                              |     |
| Funding                  | 22  | Give the source of funding and the role of the funders for the present study and, if applicable, for the original study on which the present article is based                                                | Yes |

\*Give information separately for cases and controls in case-control studies and, if applicable, for exposed and unexposed groups in cohort and cross-sectional studies.

**Note:** An Explanation and Elaboration article discusses each checklist item and gives methodological background and published examples of transparent reporting. The STROBE checklist is best used in conjunction with this article (freely available on the Web sites of PLoS Medicine at <http://www.plosmedicine.org/>, Annals of Internal Medicine at <http://www.annals.org/>, and Epidemiology at <http://www.epidem.com/>). Information on the STROBE Initiative is available at [www.strobe-statement.org](http://www.strobe-statement.org).



# BMJ Open

## Delays between the onset of symptoms and first rheumatology consultation in patients with rheumatoid arthritis in the UK: an observational study

|                                 |                                                                                                                                                                                                                                                                                                                                                                                                                                                                                                                                                                                                                                                                                                                                                                           |
|---------------------------------|---------------------------------------------------------------------------------------------------------------------------------------------------------------------------------------------------------------------------------------------------------------------------------------------------------------------------------------------------------------------------------------------------------------------------------------------------------------------------------------------------------------------------------------------------------------------------------------------------------------------------------------------------------------------------------------------------------------------------------------------------------------------------|
| Journal:                        | <i>BMJ Open</i>                                                                                                                                                                                                                                                                                                                                                                                                                                                                                                                                                                                                                                                                                                                                                           |
| Manuscript ID                   | bmjopen-2018-024361.R1                                                                                                                                                                                                                                                                                                                                                                                                                                                                                                                                                                                                                                                                                                                                                    |
| Article Type:                   | Research                                                                                                                                                                                                                                                                                                                                                                                                                                                                                                                                                                                                                                                                                                                                                                  |
| Date Submitted by the Author:   | 22-Sep-2018                                                                                                                                                                                                                                                                                                                                                                                                                                                                                                                                                                                                                                                                                                                                                               |
| Complete List of Authors:       | Stack, Rebecca; Nottingham Trent University , Division of Psychology Nightingale, Peter; Queen Elizabeth Hospital Birmingham, Wellcome Trust Clinical Research Facility<br>Jinks, Clare; Keele University, Arthritis Research UK Primary Care Centre Study Syndicate, DELAY<br>Shaw, Karen; University of Birmingham, Institute of Applied Health Research<br>Herron-Marx, Sandy; Independent Research Consultant<br>Horne, Rob; UCL, UCL School of Pharmacy<br>Deighton, Chris; Derby Teaching Hospitals NHS Foundation Trust<br>Kiely, Patrick ; St George's University Hospitals NHS Foundation Trust<br>Mallen, Christian; Keele University, Arthritis Research UK Primary Care Centre<br>Raza, Karim; University of Birmingham, Institute of Inflammation and Ageing |
| <b>Primary Subject Heading</b>: | Rheumatology                                                                                                                                                                                                                                                                                                                                                                                                                                                                                                                                                                                                                                                                                                                                                              |
| Secondary Subject Heading:      | Health services research, Rheumatology                                                                                                                                                                                                                                                                                                                                                                                                                                                                                                                                                                                                                                                                                                                                    |
| Keywords:                       | RHEUMATOLOGY, access to care, help seeking, health service research, rheumatoid arthritis                                                                                                                                                                                                                                                                                                                                                                                                                                                                                                                                                                                                                                                                                 |
|                                 |                                                                                                                                                                                                                                                                                                                                                                                                                                                                                                                                                                                                                                                                                                                                                                           |

SCHOLARONE™  
Manuscripts

1  
2  
3 **Title: Delays between the onset of symptoms and first rheumatology consultation in**  
4  
5 **patients with rheumatoid arthritis in the UK: an observational study**  
6  
7

8  
9  
10 **Authors**

11 Rebecca J Stack<sup>1,2</sup>, Peter Nightingale<sup>3</sup>, Clare Jinks<sup>4</sup>, (DELAY study syndicate), Karen Shaw<sup>5</sup>,  
12  
13 Sandy Herron-Marx<sup>6</sup>, Rob Horne<sup>7</sup>, Chris Deighton<sup>8</sup>, Patrick Kiely<sup>9</sup>, Christian D Mallen<sup>4</sup> and  
14  
15 Karim Raza<sup>1,10</sup>  
16  
17

18  
19  
20  
21 **Department and Institutions**  
22

- 23 1. Institute of Inflammation and Ageing, University of Birmingham, UK.
- 24 2. Division of Psychology, Nottingham Trent University, Nottingham, UK
- 25 26 3. Wolfson Computer Laboratory, University Hospitals Birmingham NHS Foundation  
27 Trust, Birmingham, UK.
- 28 4. Research Institute for Primary Care and Health Sciences, Keele University, UK.
- 29 5. Institute of Applied Health Research, University of Birmingham, UK
- 30 31 6. Independent Research Consultant, Brussels, Belgium.
- 32 33 7. School of Pharmacy, University of London, UK.
- 34 35 8. Department of Rheumatology, Derby Hospitals NHS Foundation Trust, Derby, UK.
- 36 37 9. Department of Rheumatology, St Georges University Hospital NHS Foundation Trust,  
38 London, UK.
- 39 40 10. Department of Rheumatology, Sandwell and West Birmingham Hospitals NHS Trust,  
41 Birmingham, UK.
- 42 43
- 44 45
- 46 47
- 48 49
- 50 51
- 52 53
- 54 55
- 56 57
- 58 59
- 60

1  
2  
3 **Corresponding author**  
4

5  
6 Professor Karim Raza

7  
8 Rheumatology Research Group

9  
10 Institute of Inflammation and Ageing (IIA)

11  
12 University of Birmingham

13  
14 Queen Elizabeth Hospital, Birmingham, B15 2WB

15  
16 E mail : [k.raza@bham.ac.uk](mailto:k.raza@bham.ac.uk)  
17  
18  
19  
20

21 **Word Count** (excluding title page, abstract, references and tables): 2499  
22  
23  
24  
25  
26  
27

28 **Keywords**  
29

30 Rheumatoid arthritis; patient delay; Primary care delay; help-seeking; access to care;  
31  
32  
33  
34  
35  
36  
37  
38  
39  
40  
41  
42  
43  
44  
45  
46  
47  
48  
49  
50  
51  
52  
53  
54  
55  
56  
57  
58  
59  
60

**Strengths of this study.**

This study surveyed a large sample of patients with new onset rheumatoid arthritis in the UK to identified delays in access to care.

This study identified that approximately 20% of patients saw a rheumatologist within 12 weeks of symptom onset, and factors associated with slower self-referral and slower GP referral were identified.

**Limitations of this study.**

Data were collected at the point of diagnosis and information regarding key dates (in particular the onset of symptoms and presentation to primary care) were reliant on patient recall.

This research has identified factors associated with delays, however, further research is needed to identify factors which would accelerate self-referral, GP referral and hospital waiting times for those experiencing early symptoms.

## Abstract

Objective: To investigate delays from symptom onset to rheumatology assessment for patients with a new onset of rheumatoid arthritis (RA) or unclassified arthritis.

Methods: Newly presenting adults with either RA or unclassified arthritis were recruited from rheumatology clinics. Data on the length of time between symptom onset and first seeing a GP (patient delay), between first seeing a GP and being referred to a rheumatologist (general practitioner delay) and being seen by a rheumatologist following referral (hospital delay) were captured.

Results: 822 patients participated (563 female, mean age 55 years). The median time between symptom onset and seeing a rheumatologist was 27.2 weeks (IQR 14.1–66 weeks); only 20% of patients were seen within the first 3 months following symptom onset. The median patient delay was 5.4 weeks (IQR 1.4–26.3 weeks). Patients who purchased over the counter medications or used ice/heat packs took longer to seek help than those who did not. In addition, those with a palindromic or an insidious symptom onset delayed for longer than those with a non-palindromic or acute onset. The median general practitioner delay was 6.9 weeks (IQR 2.3–20.3 weeks). Patients made a mean of 4 GP visits before being referred. The median hospital delay was 4.7 weeks (IQR 2.9–7.5 weeks).

Conclusion: This study identified delays at all levels in the pathway towards assessment by a Rheumatologist. However, delays in primary care were particularly long. Patient delay was driven by the nature of symptom onset. Complex multi-faceted interventions to promote rapid help seeking and to facilitate prompt onward referral from primary care should be developed.

**Introduction:**

Rheumatoid arthritis (RA) is a chronic inflammatory disease affecting approximately 1% of the population.<sup>1;2</sup> Rheumatoid arthritis is associated with significant morbidity in large part as a consequence of extra-articular co-morbidities associated with systemic inflammation. In the UK it has been estimated that RA costs the NHS around £560 million per year and that additional costs to the economy of sick leave and work-related disability total £1.8 billion per year.<sup>3</sup> The first three months following the onset of RA symptoms represents an important therapeutic window.<sup>4</sup> Treatment during this phase improves long-term clinical outcomes, increasing the proportion of patients whose disease enters remission, reducing RA related joint damage and reducing the eventual need for joint replacement surgery.<sup>5-10</sup> Therefore, it is vital that patients are seen by Rheumatologists rapidly following the onset of RA symptoms to allow the rapid introduction of disease modifying anti-rheumatic drug treatment. However, despite increased recognition of the benefits of early treatment there remains considerable delay between symptom onset and the initiation of therapy.<sup>11-13</sup> Indeed a report by the UK's National Audit Office (NAO) in 2009 estimated that only 10% of patients with RA were treated within three months of symptom onset. The NAO's modelling suggested significant financial benefits for the broader economy and quality of life benefits for the individual if the proportion of patients treated earlier was increased.<sup>3</sup>

The patient's pathway to care can be delayed for a number of reasons, including delays on the part of the patient in recognising the significance of the early symptoms of RA.<sup>14-16</sup>

1  
2  
3 Recent research has linked patients' perceptions of RA and coping styles to the length of  
4  
5 time taken to seek help.<sup>17</sup> Before seeking medical help from a physician, patients may seek  
6  
7 help from a range of services including complementary therapists, pharmacists and  
8  
9 telephone and on-line services. However, the use of these services at the onset of  
10  
11 inflammatory arthritis has not been fully explored. Primary healthcare professionals often  
12  
13 find the early symptoms of RA difficult to distinguish from those of other rheumatic  
14  
15 diseases, making timely and appropriate referrals to rheumatologists challenging.<sup>18;19</sup> There  
16  
17 may thus be delays in healthcare professionals making a referral to a Rheumatologist and  
18  
19 also in assessment at the secondary care level, contributing further to the delay in making a  
20  
21 diagnosis and commencing appropriate therapy.  
22  
23  
24  
25  
26  
27

28 Several studies conducted across a range of countries have shown long delays between the  
29  
30 onset of symptoms and a patient's first consultation with a rheumatologist.<sup>20-23</sup> However,  
31  
32 data related to lengths of time between the onset of inflammatory musculoskeletal  
33  
34 symptoms and first seeing a GP, between first seeing a GP and being referred to a  
35  
36 rheumatologist and being seen by a rheumatologist following referral were not available  
37  
38 across multiple NHS Trusts in multiple regions of the UK at the time of this study.  
39  
40  
41  
42  
43

#### 44 **Aim**

45  
46 The aim of this study was to investigate the extents of delay in assessment of patients with  
47  
48 RA and unclassified arthritis. Specifically the study assessed extents of delay at the level of  
49  
50 the patient in seeking help from the general practitioner, the general practitioner in  
51  
52 referring to a Rheumatologist and the Rheumatologist in assessing the patient following  
53  
54 referral. The relationships between extents of delay and clinical and demographic variables  
55  
56  
57  
58  
59  
60

1  
2  
3 were explored and data captured relating to sources of information, help and advice utilized  
4  
5 by patients prior to GP consultation.  
6  
7  
8

## 9 10 **Methods**

11  
12 A questionnaire based survey of consecutively presenting patients with a new onset of RA or  
13  
14 unclassified inflammatory arthritis was undertaken in England and Scotland. Networks such  
15  
16 as the Early Rheumatoid Arthritis Network<sup>24</sup> and the National Institute for Health Research  
17  
18 Clinical Research Network<sup>25</sup> were used identify Rheumatology centres to participate in this  
19  
20 study. RJS also promoted the study during abstract presentations at British Society for  
21  
22 Rheumatology meetings.  
23  
24  
25

26  
27  
28 Data were collected from Rheumatology departments in 34 NHS Trusts. Rheumatology  
29  
30 departments were secondary care based, although one rheumatology department  
31  
32 (Sandwell and West Birmingham Hospitals) operated clinics in both hospital and community  
33  
34 settings. Eligible patients were recruited on their first or second visit to the rheumatology  
35  
36 department following a primary care referral (data were not collected on the numbers of  
37  
38 patients whose data were collected at their first visit or at their second visit). Rheumatologists  
39  
40 were asked to approach consecutively presenting patients who met the eligibility criteria.  
41  
42  
43

44 Eligible patients were newly referred adults (aged  $\geq 18$  years) with clinically apparent  
45  
46 synovial swelling of one or more joints who had either a new onset of RA (according to 2010  
47  
48 ACR / EULAR criteria<sup>26</sup>) or unclassified arthritis (UA; defined as a failure to fulfil classification  
49  
50 criteria for another inflammatory rheumatic disease). Patients with UA were recruited, as in  
51  
52 many cases patients with UA at initial secondary care assessment progress to RA over  
53  
54  
55 time.<sup>27</sup>  
56  
57  
58  
59  
60



1  
2  
3  
4  
5 Data were collected using two questionnaires (available from the corresponding author on  
6  
7 request). First, following consent, the recruiting healthcare professional, with the patient  
8  
9 present, completed a questionnaire that captured data on extents of delays between [1]  
10  
11 symptom onset and seeing a healthcare professional (from herein referred to as 'patient  
12  
13 delay', these data was gathered from the patient's account by the recruiting healthcare  
14  
15 professional), [2] seeing a general practitioner and being referred to a rheumatologist (from  
16  
17 herein referred to as 'general practitioner e delay', these data was gathered from the  
18  
19 patient's account by the recruiting healthcare professional), and [3] being referred to a  
20  
21 rheumatologist and seeing a rheumatologist (from herein referred to as 'hospital delay',  
22  
23 these data were gathered from referral letters and hospital notes). Data were also gathered  
24  
25 on [1] demographic variables including the patient's age, gender, education, employment  
26  
27 status and postcode; deprivation ranks were calculated from postcode data using  
28  
29 Geoconvert 2010 which produced an Index of Multiple Deprivation (IMD) score,<sup>28</sup> [2] clinical  
30  
31 variables including the mode of symptom onset (palindromic (defined as intermittent  
32  
33 symptoms) vs. non-palindromic (defined as persistent symptoms)), rapidity of symptom  
34  
35 onset (acute vs. insidious; an acute onset was typically viewed as an onset of symptoms  
36  
37 which came on rapidly over 24-48 hours), duration of morning stiffness, swollen and tender  
38  
39 joint counts, Disease Activity Score 28 (DAS28) and fulfilment of 2010 ACR/EULAR criteria for  
40  
41 classification of RA<sup>26</sup>.

42  
43  
44 In addition, via a separate questionnaire that patients completed by themselves, patients  
45  
46 provided data on actions taken in relation to their symptoms prior to seeking help from  
47  
48 primary care . The variables captured were informed by previous qualitative research,  
49  
50  
51  
52  
53  
54  
55  
56  
57  
58  
59  
60

1  
2  
3 including patient interviews and interviews with healthcare professionals. In addition, we  
4  
5 had input from Patient Research Partners and the questions asked were validated and  
6  
7 assessed for reliability<sup>29</sup>.  
8  
9

### 10 11 12 **Patient and Public Involvement**

13  
14 Patient and public involvement was an important element of this study. Patient  
15  
16 representatives from Sandwell and West Birmingham Hospitals NHS Trust were involved in  
17  
18 the study design, advised on the content of patient facing materials including participant  
19  
20 information sheets and consent forms and the content of questionnaires including  
21  
22 questions related to actions taken by patients prior to consulting their GPs. Patients were  
23  
24 members of the Project Management Group reviewing study recruitment and supporting  
25  
26 the Group in developing approaches to ensure that recruitment proceeded to time and  
27  
28 target  
29  
30  
31  
32  
33  
34  
35

### 36 **Analysis**

37  
38 To ensure that the data met parametric assumptions, the distribution and levels of  
39  
40 multicollinearity between variables were checked. Data on patient delays, general  
41  
42 practitioner delays and hospital delays were not normally distributed, therefore, log values  
43  
44 of these delay data were created to generate normally distributed variables.  
45  
46  
47

48  
49 For each of the outcomes patient delay, general practitioner delay and hospital delay a  
50  
51 general linear model was used with main effects and two-way interactions for the following  
52  
53 explanatory variables: gender, ethnicity, IMD score, age, education, employment status,  
54  
55 mode of onset, rapidity of onset, patient reported family history of RA and RA vs. UA. For  
56  
57  
58  
59

each outcome any two-way interactions which were not significant were removed in a backwards stepwise fashion, with the pairings with the highest p values being removed first. All main effects were retained, so that the final model for each outcome included all ten explanatory variables and any significant two-way interactions ( $p < 0.01$ ). All significant main effects and interactions are reported in the Results section.

## Results

### 1. Participant characteristics

Data were collected from 856 patients between 2011 and 2014. Patients were withdrawn from the study due to incomplete data (21 cases) and ineligibility (13 cases in whom there was no clinical synovitis reported at recruitment). Data were thus analysed from 822 patients of whom 68.5% were female with a mean age of 55 years. Characteristics of patients are presented in table 1.

**Table 1:** Demographic and disease related characteristics of patients. Data are presented as either percentage (number) or median (IQR) as appropriate. Tender joint count is out of 42 joints (10 PIP, 10 MCP, 2 wrist, 2 elbow, 2 shoulder, 2 hip, 2 knee, 2 ankle, 10 MTP). Swollen joint count is out of 40 joints (10 PIP, 10 MCP, 2 wrist, 2 elbow, 2 shoulder, 2 knee, 2 ankle, 10 MTP).

|                          |             |
|--------------------------|-------------|
| Female                   | 68.5% (563) |
| Age, years               | 57 (45-67)  |
| Diagnosis of RA          | 73% (603)   |
| Ethnicity: Black British | 6.0% (49)   |

|                                        |                   |
|----------------------------------------|-------------------|
| South Asian                            | 7.7% (63)         |
| White British                          | 84.9% (698)       |
| Other                                  | 1.5% (12)         |
| Self-reported family history of RA     | 34.9% (287)       |
| Palindromic onset                      | 42.8% (352)       |
| Acute onset                            | 35.9% (295)       |
| Duration of morning stiffness, minutes | 60 (10-120)       |
| DAS28                                  | 4.88 (3.98 -5.80) |
| HAQ                                    | 1.13 (0.50-1.73)  |
| Tender joint count                     | 9 (4-18)          |
| Swollen joint count                    | 5 (2-10)          |

## **2. Intervals between symptom onset and first rheumatology consultation**

Overall the median time between symptom onset and seeing a rheumatologist was 27.2 weeks (IQR 14.1 – 66 weeks); only 20% of patients were seen within the first 3 months following symptom onset. The median patient delay was 5.4 weeks (IQR 1.4-26.3 weeks). The median general practitioner delay was 6.9 weeks (IQR 2.3–20.3 weeks) with patients making a mean of 4 GP visits before being referred. The median hospital delay was 4.7 weeks (IQR 2.9–7.5 weeks).

1  
2  
3 Patients with a palindromic symptom onset had a significantly longer patient delay than  
4  
5 those with a non-palindromic onset (9.3 weeks (IQR 2-43 weeks) vs 4.3 weeks (IQR 1-17  
6  
7 weeks);  $p < 0.001$ , t-test). Furthermore, those with an acute symptom onset had significantly  
8  
9 shorter patient delays than those with an insidious symptoms onset (2.4 weeks (IQR 1 - 6.6  
10  
11 weeks) vs 11.1 weeks (IQR 4-44 weeks;  $p < 0.001$ , t-test).  
12  
13

#### 14 15 16 17 *Resources used before seeking help from primary care*

18  
19  
20 Patients reported taking a range of actions in relation to their symptoms before seeking help  
21  
22 from their GP and in some cases these actions were associated with longer delays in GP  
23  
24 consultation (see table 2). Most often patients reported purchasing tablets from 'the  
25  
26 chemist', although only a small proportion actually reported speaking to a pharmacist.  
27  
28 Other actions reported by patients included applying heat or cold packs to joints or buying  
29  
30 joint supports.  
31  
32  
33  
34  
35  
36  
37

38 **Table 2.** *Actions taken by patients with inflammatory arthritis before seeking help from their*  
39  
40 *GP with comparison made for patient delay between those who did and did not undertake*  
41  
42 *this action using independent t-tests; \* P value for comparison of those who did and did not*  
43  
44 *undertake this action.*  
45  
46  
47

| Actions taken before seeking help from GP | % (number) of participants undertaking this action | Median (IQR) patient delay in weeks for those undertaking | Median (IQR) patient delay in weeks for those not undertaking | P value |
|-------------------------------------------|----------------------------------------------------|-----------------------------------------------------------|---------------------------------------------------------------|---------|
|                                           |                                                    |                                                           |                                                               |         |

|                                                 |                           | <b>this action</b> | <b>this action</b> |          |
|-------------------------------------------------|---------------------------|--------------------|--------------------|----------|
| Bought tablets from the chemist                 | 51.1%<br>(273 out of 534) | 6.9 (2-30.7)       | 4.7 (1.4-23)       | p=0.036  |
| Used an ice or heat pack on joint               | 47.8%<br>(254 out of 531) | 7.6 (2-30.3)       | 4.9 (2-26.1)       | p=0.045  |
| Took baths                                      | 47.4%<br>(251 out of 529) | 6.3 (2-30.4)       | 5.6 (2-26.1)       | p=0.473  |
| Bought joint supports (splints, tubi-grips etc) | 37.4%<br>(198 out of 529) | 4.4 (2.1-18.6)     | 5.1 (2-26.9)       | p=0.362  |
| Used alternative therapies                      | 25.2%<br>(134 out of 531) | 8.3 (2-42.1)       | 5.3 (2-26.3)       | p=0.020  |
| Bought products from a health shop              | 19.0%<br>(101 out of 532) | 5.9 (2-36.3)       | 5.9 (2-26)         | p=0.182  |
| Modified diet                                   | 14.4%<br>(76 out of 529)  | 6 (2.1-35.3)       | 6.1(2-26.3)        | p= 0.183 |
| Used prayer or sought spiritual guidance        | 8.4%<br>(45 out of 534)   | 4.4 (2.1-18.6)     | 6.3 (2-26.9)       | p=0.941  |
| Spoke to a pharmacist                           | 7.9%<br>(41 out of 521)   | 5.9 (2-38.1)       | 5.9 (2-26.3)       | p=0.544  |

1  
2  
3  
4  
5  
6 Thirty-seven percent of patients reported looking on the internet (for example visiting the  
7  
8 NHS direct website, BUPA website, Arthritis Research UK website and searching for  
9  
10 information using search engines such as Google). Patients also reported seeking support via  
11  
12 a telephone helpline; 5.7% described calling the NHS direct helpline or another telephone  
13  
14 health advice service. 3.7% sought help in the workplace (e.g. from an occupational nurse),  
15  
16 2% of patients went directly to the Accident and Emergency Department and 1% attended  
17  
18 an NHS walk-in centre.  
19  
20  
21  
22  
23  
24  
25

#### 26 **Multivariate analysis: Patient delay**

27  
28  
29 The interaction model showed main effects for mode of onset (palindromic vs. non-  
30  
31 palindromic;  $F=26.65$ ,  $P<0.01$ ) and rapidity of onset (acute vs. insidious;  $F= 65.36$ ,  $P<0.01$ ).  
32  
33 An interaction was found between palindromic onset and gender ( $F=45.658$ ,  $P<0.01$ ); men  
34  
35 with a palindromic onset waited significantly longer before seeking help.  
36  
37  
38  
39  
40  
41  
42  
43  
44  
45  
46  
47  
48  
49  
50  
51  
52  
53  
54  
55  
56  
57  
58  
59  
60

### **Multivariate analysis: General practitioner delay**

A main effect was found for ethnicity ( $F=6.26$ ,  $P<0.01$ ). Significant differences in general practitioner delay were found between White British and South Asian patients (6.2 weeks (IQR 2-18.6) vs 22 weeks (IQR 6.5-39.8);  $P<0.001$ ) and between White British and Black British patients (6.2 weeks (IQR 2-18.6) vs 11.1 weeks (IQR 4.3-21.7);  $P<0.001$ ). No significant difference was found between South Asian and Black British patients ( $P=1.000$ ).

A main effect was also found for family history ( $F=5.89$ ,  $P<0.01$ ); the median general practitioner delay for those with a self-reported family history of RA was 9 weeks (IQR 2.4-25.7), while general practitioner delay for those with no family history was 6.3 weeks (IQR 2.3-19). Interactions at a statistically significant level ( $<0.01$ ) were not found.

### **Multivariate analysis: Hospital delay**

The original model included main effects and two-way interactions for the following explanatory variables: gender, ethnicity, IMD score, age, education, employment status, mode of onset, rapidity of onset, family onset and RA vs. UA. None of the main effects or interactions (when removed backwards) were significant in predicting the delay between referral and being seen in secondary care.



## Discussion

International guidelines recommend that the treatment of RA should begin as soon as possible after the onset of symptoms, ideally aiming to capture patients within the first 3 months following symptom onset. However, this large UK study of delays in access to care for RA patients found that the median patient delay in seeking help at the onset of symptoms was 5.4 weeks, while the median delay between seeing a healthcare professional and being referred was 6.9 weeks. Our study highlights that only 20% of patients were seen within the first 3 months of symptom onset. This appears to be lower than the rate reported in other European countries for example a recent study in Austria reported that 38% of patients were seen within the first 3 months<sup>30</sup>. The present study also found an average delay of 4.7 weeks from referral until the patient was seen by a rheumatologist, similar to figures reported in the NAO report<sup>3</sup>. Unlike our previous study conducted at a single centre in the UK where patient delay accounted for the largest element of delay,<sup>13</sup> we found that GP delay was the largest contributor to overall delay; patient delay was less than we had previously reported in our single centre study.

This research highlights that delays in primary care are long, and a major contributor to overall delays between symptom onset and the first rheumatology visit. General practitioners are faced with a number of barriers to identifying patients with newly presenting RA including the often non-specific nature of symptoms at the earliest stages of RA.<sup>18</sup> Research is underway to define symptom complexes most predictive of RA development in patients with newly presenting musculoskeletal symptoms. For example, a questionnaire has been developed and validated to capture such symptoms in patients

1  
2  
3 presenting with joint symptoms which by history are suggestive of an underlying  
4  
5 inflammatory cause<sup>31</sup> and data are currently being collected from such patients in secondary  
6  
7 care based longitudinal observational cohort studies to identify symptoms that may predict  
8  
9 RA development. Furthermore an assessment of primary care databases has identified a  
10  
11 range of symptoms including hand related joint symptoms, morning stiffness and carpal  
12  
13 tunnel syndrome type symptoms as being ones with which patients frequently present to  
14  
15 the GP prior to the point at which the GP refers the patient to a Rheumatologist or records a  
16  
17 diagnosis of RA<sup>32</sup> It is likely that a combination of education, and evidence based referral  
18  
19 algorithms, will be needed to ensure that suspected cases are referred early. For example,  
20  
21 in Fife, Scotland GPs did not have access to rheumatoid factor testing during the course of  
22  
23 our study, and used guidelines with pictorial representations to help identify early synovitis  
24  
25 (personal communication Dr Helen Harris). Fife was a participating centre in this study, and  
26  
27 was found to have the lowest GP referral time of all centres surveyed. Furthermore,  
28  
29 facilitating access to secondary care, for example through the establishment of rapid  
30  
31 assessment clinics whose main aim is to identify whether the patient does or does not have  
32  
33 synovitis have been shown to significantly reduce delays in the assessment of patients.<sup>33</sup> A  
34  
35 limitation of our research is that the study was not able to assess regional differences across  
36  
37 NHS Trusts. A study comparing delays and referral patterns between hospitals with local  
38  
39 policies and practices which may influence the time between onset and first consultation  
40  
41 would be useful and an international study would be particularly helpful.  
42  
43  
44  
45  
46  
47  
48  
49  
50

51 A number of factors were found to influence GP delay including ethnicity. Studies in the field  
52  
53 of oncology have also found that people from ethnic minority backgrounds face longer GP  
54  
55 delays,<sup>34;35</sup> In the context of RA it is possible that the early symptomatology of patients from  
56  
57  
58  
59  
60

1  
2  
3 ethnic minority backgrounds is different from, and less typical of RA than that of, patients of  
4  
5 white British background, thus making recognition more challenging for GPs. Data certainly  
6  
7 exist that the clinical phenotype of established RA differs in patients of South Asian origin  
8  
9 compared with patients of White British origin,<sup>36</sup> though data relating the clinical  
10  
11 presentations of RA in these groups are lacking. Furthermore, it is unclear why a self-  
12  
13 reported family history of RA would be associated with longer delays although it is  
14  
15 important to recognise that GPs may not have elicited this information from the patient.<sup>37</sup>  
16  
17 Qualitative approaches may be helpful to address some of these issues in the future.  
18  
19  
20  
21  
22

23 Previous qualitative studies and a meta-synthesis have identified barriers to help seeking at  
24  
25 the onset of RA.<sup>37-43</sup> The present study identifies that before seeking formal medical  
26  
27 attention, people experiencing the early symptoms of RA seek information and help from a  
28  
29 number of alternative sources and often self-medicate. We identified that buying tablets  
30  
31 from a pharmacy, and using heat or ice on joints was significantly associated with longer  
32  
33 patient delays. This finding highlights that some self-management behaviours, particularly  
34  
35 those linked to accessing pharmacy services can negatively impact on the time it takes to  
36  
37 seek help; this needs further exploration. Factors previously suggested to be associated  
38  
39 with delays in GP consultation included an insidious onset of mild symptoms and a lack of  
40  
41 knowledge about RA, personal susceptibility to RA and the availability of treatments to slow  
42  
43 disease progression. In our national sample 64.1% of people describe an insidious onset of  
44  
45 RA, and 42.8% describe a palindromic onset of RA. Therefore, majority large proportion of  
46  
47 patients surveyed experienced a slow and / or intermittent onset of their inflammatory joint  
48  
49 symptoms. Our quantitative data are thus consistent with results from qualitative studies,  
50  
51  
52  
53  
54  
55  
56  
57  
58  
59  
60

1  
2  
3 demonstrating that the mode and rapidity of onset of symptoms is significantly associated  
4  
5 with patient delays.  
6

7 This study has a number of limitations. Firstly, the interval between first consultation with a  
8  
9 Rheumatologist and initiation of disease modifying anti-rheumatic drug (DMARD) treatment  
10  
11 was not measured. Any additional delay in commencing DMARD treatment will negatively  
12  
13 impact the patient and variables associated with delays at this level should be assessed in  
14  
15 future studies. Secondly, during the course of this study a number of guidelines related to  
16  
17 RA management were published which may have influenced practice, and patterns of  
18  
19 referral. We were not able to explore the relationships between the availability / local  
20  
21 adoption of guidelines and delays in the assessment of patients. Future investigation should  
22  
23 assess the impact of policy changes on patterns of help-seeking, referral and assessment.  
24  
25 Thirdly, the rheumatology centres participating in this study were self-selecting, therefore,  
26  
27 there may be biases in the characteristics of the rheumatology centres which participated in  
28  
29 this study. For example, the participating rheumatology units may have had a particular  
30  
31 interest in early arthritis. Only a study which recruited consecutive patients from all  
32  
33 rheumatology units across the UK would be able to provide a truly national picture.  
34  
35 Fourthly, whilst we were able to document the length of delay at a primary care level there  
36  
37 were important variables which may have influenced this delay which we did not record and  
38  
39 so were unable to explore. For example it would have been helpful have access to results  
40  
41 tests performed in primary care to assess whether levels of inflammatory markers or RA  
42  
43 related autoantibodies measured in primary care influenced the rapidity of referral from  
44  
45 primary care. Indeed a recent quantitative survey of GPs' anticipated actions in primary care  
46  
47 when dealing with patients with suspected RA suggest that results of these tests may  
48  
49 influence GP behaviours<sup>44</sup>. Future research should address this. Similarly, a number of  
50  
51  
52  
53  
54  
55  
56  
57  
58  
59  
60

1  
2  
3 secondary care related variables may have influenced the extent of secondary care delay  
4  
5 including the number of rheumatologists at each Trust, whether a dedicated early arthritis  
6  
7 clinic was in place and approaches taken to the triage of referrals. Data relating to these  
8  
9 variables were not collected though future work addressing issues of delay should address  
10  
11 these important issues. Fifthly, data relating to the dates of onset of symptoms and initial  
12  
13 GP consultation were gathered from patients' histories, and therefore relied on patient  
14  
15 recollection with a possible associated error. However, a previous study addressing delays in  
16  
17 the assessment of patients with RA, compared patient accounts of their journeys to first  
18  
19 rheumatology consultation against medical records and highlighted the accuracy of patient  
20  
21 recollection in relation to dates found to be documented in primary care records<sup>45</sup>. This, to  
22  
23 some extent, validates our approach of using patient memory to define the dates of  
24  
25 symptom onset and initial GP presentation. An alternative approach would be a  
26  
27 longitudinal observational study in the general population to track the development of  
28  
29 symptoms and the relationship between that and GP consultation, GP referral and  
30  
31 secondary care assessment. A challenge with this approach is the low incidence of RA and  
32  
33 thus the requirement for a very large sample size. One could potentially enrich the  
34  
35 population for RA risk by, for example, following individuals who are at increased risk of RA  
36  
37 (e.g. the first degree relatives of patients with RA). However, one of the challenges with this  
38  
39 strategy is that simply being involved in such a study may influence subsequent patient and  
40  
41 GP behaviour.  
42  
43  
44  
45  
46  
47  
48  
49  
50

51 Whilst delays in primary care are the largest contributor to overall delay, patient delay and  
52  
53 hospital delay represent important components. This study found that the nature of  
54  
55 symptoms onset influenced how quickly patients with RA sought help, suggesting that those  
56  
57  
58  
59  
60

1  
2  
3 with an acute onset of persistent symptoms seek help faster than those with insidious and  
4  
5 palindromic onsets. Interventions to encourage rapid help seeking should consider  
6  
7 highlighting the frequently insidious onset of RA to members of the public stressing that  
8  
9 help should be sought even when symptoms are mild. However, even those with a rapid  
10  
11 onset of persistent symptoms often delayed for prolonged periods before seeking help. We  
12  
13 have previously shown that members of the public view musculoskeletal symptoms, even  
14  
15 those with clear inflammatory features, as less worrisome and less requiring rapid  
16  
17 assessment as compared with symptoms of other common diseases such as ischaemic type  
18  
19 chest pain or bowel disturbance with associated rectal blood loss<sup>46</sup>. Enhanced public  
20  
21 education to highlight the significance of inflammatory type musculoskeletal symptoms is  
22  
23 thus likely to be needed. Interventions at multiple levels, including at the levels of the  
24  
25 public, the services which members of the public consult after the onset of symptoms (e.g.  
26  
27 pharmacies), primary care and secondary care will be needed to reduce overall delays in  
28  
29 access to appropriate specialists.  
30  
31  
32  
33  
34  
35  
36  
37  
38  
39  
40  
41  
42  
43  
44  
45  
46  
47  
48  
49  
50  
51  
52  
53  
54  
55  
56  
57  
58  
59  
60

### Competing interests

No competing Interest:

### Contributorship

RJS, CJ, SHM, CDM, KS, RH, CD, PK and KR made substantial contributions to the conception or design of the work. The acquisition of data was undertaken by RJS, KR, PK and CD. RJS, CJ and SHM facilitated patient and public involvement in the design, delivery and interpretation of this study. The analysis and interpretation of data were undertaken by RJS, PN and KR. RJS, PN, CJ, SHM, CDM, KS, RH, CD, PK and KR were involved in drafting the work and revising it critically for important intellectual content. RJS, CJ, SHM, CDM, KS, RH, CD, PK and KR gave final approval of the version published. All authors agree to be accountable for all aspects of the work in ensuring that questions related to the accuracy or integrity of any part of the work are appropriately investigated and resolved.

### Acknowledgements

We would like to thank the staff at the rheumatology departments who collected data for this study. We would also like to thank patient research partners at Sandwell and West Birmingham Hospitals NHS Trust for their help and support with this study.

### Funding information

This article presents independent research funded in part by the National Institute for Health Research (NIHR) under the Research for Patient Benefit Programme (funder's reference PB-PG-1208-18114). CDM is funded by the National Institute for Health Research (NIHR) Collaborations for Leadership in Applied Health Research and Care West Midlands, the NIHR School for Primary Care Research and a NIHR Research Professorship in General Practice (NIHR-RP-2014-04-026). CJ is part-funded by the NIHR Collaborations for Leadership in Applied Health Research and Care West Midlands. RH is part-funded by North Thames CLAHRC and his contribution was also supported by an NIHR Senior Investigator Award. KS is funded by the NIHR CLAHRC West Midlands initiative. The views expressed in this publication are those of the authors and not necessarily those of the NHS, the National Institute for Health Research or the Department of Health and Social Care.

1  
2  
3 **Ethical approval information** Ethical approval was obtained from South Birmingham  
4 Research Ethics Committee (reference no. 10/H1207/98) and all participants gave written  
5 informed consent.  
6  
7

8  
9  
10 **Data sharing statement**

11 Data are available upon request from the corresponding author.  
12  
13

14  
15 **Non-author contributors - Delay study syndicate**

16  
17  
18 Sandwell and West Birmingham Hospitals NHS Trust: Biruk Asfaw, Sabrina Kapoor, Kanta  
19 Kumar, Adam Slater & Christopher Buckley

20  
21 Derby Teaching Hospitals NHS Foundation Trust: Chris Deighton & Alison Booth

22  
23 Nottingham University Hospitals NHS Trust: Marie-Josephe Pradere, Ira Pande & Ian  
24 Gaywood

25  
26 St George's University Hospitals NHS Trust: Francesca Leone & Patrick Keily

27  
28 Lancaster Teaching Hospitals NHS Foundation Trust: Bronwen Evans & Marwan Bukhari

29  
30 Poole Hospitals NHS Foundation Trust: Julia Taylor, Helena Knowles, & Sarah Westlake

31  
32 University Hospitals Coventry and Warwickshire NHS Trust: Tanya Potter

33  
34 Sherwood Forest Hospitals NHS Foundation Trust: Debbie Wilson, Jayne Smith & David  
35 Walsh

36  
37 King's College Hospitals NHS Foundation Trust: Nyarko Ahwireng, Audu Aderonke & David  
38 Scott

39  
40 Guy's and St Thomas NHS Foundation Trust: Louise Nel, Naomi Hare & Andrew Cope

41  
42 North Bristol NHS Trust: Julie Taylor, Wendy Wilmott & Paul Creamer

43  
44 West Hertfordshire Hospitals NHS Trust: Lynn Currie, Adam Young & Karen Markwell

45  
46 Lewisham and Greenwich NHS Trust: Louise Pollard & Debbie Johnson

47  
48 Royal Surrey Country NHS Foundation Trust: Stephanie Allen & Raad Makadsi

49  
50 Hampshire Hospitals NHS Foundations Trust: Peter Prouse & Janet Cushnaghan

51  
52 University Hospitals of Leicester NHS Trust: Jessy Sabu & Moorthy Arumugam

53  
54 County Durham and Darlington NHS Foundation Trust: Matt Bridges & Pam Race

55  
56 Weston Area Health NHS Trust: Dawn Symonds & Matt Bridges  
57  
58  
59  
60



1  
2  
3 University Hospitals Birmingham NHS Foundation Trust: Jackie Cobb, Andrew Filer, Simon  
4 Bowman & Paresh Jobanputra

5  
6 Royal Wolverhampton Hospital NHS Trust (at the time of recruitment the hospital from  
7 which patients were recruited was within the Mid Staffordshire NHS Foundation Trust) :

8  
9 Julie Edwards & Tom Sheeran

10  
11 East Kent Hospitals University NHS Foundation Trust: Caroline Crowley & Imad Jassim

12  
13 University Hospitals of the North Midlands NHS Trust: Julie Gray & Jon Packham

14  
15 NHS Fife: Paul Allcoat & Helen Harris

16  
17 Yeovil District Hospital NHS Foundation Trust: Rebecca Rowland & Sally Knights

18  
19 Northumbria Healthcare NHS Foundation Trust AND The Newcastle Upon Tyne Hospitals

20  
21 NHS Foundation Trust: Peta Heslop, Sandra Robinson, David Walker, Heather Russell &  
22 Sheryl Mitchell

23  
24 Chesterfield Royal Hospital NHS Foundation Trust: Heather Cripps & Kevin Fairburn

25  
26 Lancashire Teaching Hospitals NHS Foundation Trust AND East Lancashire Hospital NHS  
27 Trust: Sue Cotterell, Gillian Welch, Ayesha Madan & Lee Suan Teh

28  
29 Cambridge University Hospitals NHS Foundation Trust: Lucy Winstanley & Shweta Bhagat

30  
31 The Dudley Group NHS Foundation Trust: Lucy Kadiki, Chitra Ramful & Ravinder Sandhu

32  
33 Royal Cornwall Hospitals NHS Trust: Amanda Datson, & Anthony Woolf  
34  
35  
36  
37  
38  
39  
40  
41  
42  
43  
44  
45  
46  
47  
48  
49  
50  
51  
52  
53  
54  
55  
56  
57  
58  
59  
60

## Reference List

- (1) Humphreys JH, Verstappen SM, Hyrich KL, Chipping JR, Marshall T, Symmons DP. The incidence of rheumatoid arthritis in the UK: comparisons using the 2010 ACR/EULAR classification criteria and the 1987 ACR classification criteria. Results from the Norfolk Arthritis Register. *Ann Rheum Dis* 2012; 72(8):1315-1320.
- (2) Symmons D, Turner G, Webb R, Asten P, Barrett E, Lunt M et al. The prevalence of rheumatoid arthritis in the United Kingdom: new estimates for a new century. *Rheumatology (Oxford)* 2002; 41(7):793-800.
- (3) National Audit Office. Services for people with rheumatoid arthritis. National Audit Office . 2009. London, The Stationery Office. 24-1-2013.
- (4) van Nies JA, Tsonaka R, Gaujoux-Viala C, Fautrel B, van der Helm-van Mil AH. Evaluating relationships between symptom duration and persistence of rheumatoid arthritis: does a window of opportunity exist? Results on the Leiden Early Arthritis Clinic and ESPOIR cohorts. *Ann Rheum Dis* 2015; 74(5):806-812.
- (5) Feldman DE, Bernatsky S, Houde M, Beauchamp ME, Abrahamowicz M. Early consultation with a rheumatologist for RA: does it reduce subsequent use of orthopaedic surgery? *Rheumatology (Oxford)* 2013; 52(3):452-459.
- (6) Nell VP, Machold KP, Eberl G, Stamm TA, Uffmann M, Smolen JS. Benefit of very early referral and very early therapy with disease-modifying anti-rheumatic drugs in patients with early rheumatoid arthritis. *Rheumatology (Oxford)* 2004; 43(7):906-914.
- (7) Raza K, Buckley CE, Salmon M, Buckley CD. Treating very early rheumatoid arthritis. *Best Pract Res Clin Rheumatol* 2006; 20(5):849-863.
- (8) Raza K, Filer A. The therapeutic window of opportunity in rheumatoid arthritis: does it ever close? *Ann Rheum Dis* 2015; 74(5):793-794.
- (9) Scott DL, Hunter J, Deighton C, Scott DG, Isenberg D. Treatment of rheumatoid arthritis is good medicine. *BMJ* 2011; 343:d6962.
- (10) van der Linden MP, le Cessie S, Raza K, van der Woude D, Knevel R, Huizinga TW et al. Long-term impact of delay in assessment of patients with early arthritis. *Arthritis Rheum* 2010; 62(12):3537-3546.
- (11) Feldman DE, Bernatsky S, Haggerty J, Leffondre K, Tousignant P, Roy Y et al. Delay in consultation with specialists for persons with suspected new-onset rheumatoid arthritis: a population-based study. *Arthritis Rheum* 2007; 57(8):1419-1425.
- (12) Kiely P, Williams R, Walsh D, Young A. Contemporary patterns of care and disease activity outcome in early rheumatoid arthritis: the ERAN cohort. *Rheumatology (Oxford)* 2009; 48(1):57-60.
- (13) Kumar K, Daley E, Carruthers DM, Situnayake D, Gordon C, Grindulis K et al. Delay in presentation to primary care physicians is the main reason why patients with rheumatoid arthritis are seen late by rheumatologists. *Rheumatology (Oxford)* 2007; 46(9):1438-1440.

- 1  
2  
3 (14) Stack RJ, Simons G, Kumar K, Mallen CD, Raza K. Patient delays in seeking help at the onset  
4 of rheumatoid arthritis: the problem, its causes and potential solutions. *Aging Health* 2013;  
5 9(4):425-435.  
6  
7 (15) Oliver S, Bosworth A, Airoidi M, Bunyan H, Callum A, Dixon J et al. Exploring the healthcare  
8 journey of patients with rheumatoid arthritis: a mapping project - implications for practice.  
9 *Musculoskeletal Care* 2008; 6(4):247-266.  
10  
11 (16) Villeneuve E, Nam JL, Bell MJ, Deighton CM, Felson DT, Hazes JM et al. A systematic  
12 literature review of strategies promoting early referral and reducing delays in the diagnosis  
13 and management of inflammatory arthritis. *Ann Rheum Dis* 2012; 27(1):13-22.  
14  
15 (17) Van der Elst K, De CD, Vecoven E, Arat S, Meyfroidt S, Joly J et al. Are illness perception and  
16 coping style associated with the delay between symptom onset and the first general  
17 practitioner consultation in early rheumatoid arthritis management? An exploratory study  
18 within the CareRA trial. *Scand J Rheumatol* 2015;1-8.  
19  
20 (18) Stack RJ, Llewellyn Z, Deighton C, Kiely P, Mallen CD, Raza K. General practitioners'  
21 perspectives on campaigns to promote rapid help-seeking behaviour at the onset of  
22 rheumatoid arthritis. *Scand J Prim Health Care* 2014; 32(1):37-43.  
23  
24 (19) Stack RJ, Shani M, Mallen CD, Raza K. Symptom complexes at the earliest phases of  
25 rheumatoid arthritis: a synthesis of the qualitative literature. *Arthritis Care Res* 2013;  
26 65(12):1916-1926.  
27  
28 (20) De Cock D, Meyfroidt S, Joly J, Van der Elst K, Westhovens R, Verschueren P. A detailed  
29 analysis of treatment delay from the onset of symptoms in early rheumatoid arthritis  
30 patients. *Scand J Rheumatol* 2014; 43(1):1-8  
31  
32 (21) van Nies JA, Brouwer E, de Rooy DP, van Gaalen FA, Huizinga TW, Posthumus MD et al.  
33 Reasons for medical help-seeking behaviour of patients with recent-onset arthralgia. *Ann*  
34 *Rheum Dis* 2013; 72(8):1302-1307.  
35  
36 (22) Zafar S, Badsha H, Mofti A, Delosantos A, Altares J, Matudio G et al. Efforts to increase public  
37 awareness may result in more timely diagnosis of rheumatoid arthritis. *J Clin Rheumatol*  
38 2012; 18(6):279-282.  
39  
40 (23) Nanji JA, Choi M, Ferrari R, Lyddell C, Russell AS. Time to consultation and disease-modifying  
41 antirheumatic drug treatment of patients with rheumatoid arthritis--northern Alberta  
42 perspective. *J Rheumatol* 2012; 39(4):707-711.  
43  
44 (24) Garwood W. The Early Rheumatoid Arthritis Network (ERAN). *Musculoskeletal care*. 2004  
45 Nov;2(4):240-4.  
46  
47 (25) The National Institute for Health Research Clinical Research Network.  
48 <https://www.nihr.ac.uk/about-us/how-we-are-managed/managing-centres/crn/> (accessed  
49 16<sup>th</sup> August 2018)  
50  
51 (26) Aletaha D, Neogi T, Silman AJ, Funovits J, Felson DT, Bingham CO, III et al. 2010 rheumatoid  
52 arthritis classification criteria: an American College of Rheumatology/European League  
53 Against Rheumatism collaborative initiative. *Ann Rheum Dis* 2010; 69(9):1580-1588.  
54  
55  
56  
57  
58  
59

- 1  
2  
3 (27) van der Helm-van Mil AH, Detert J, le Cessie S, Filer A, Bastian H, Burmester GR et al.  
4 Validation of a prediction rule for disease outcome in patients with recent-onset  
5 undifferentiated arthritis: moving toward individualized treatment decision-making. *Arthritis*  
6 *Rheum* 2008; 58(8):2241-2247.  
7
- 8 (28) Midas. GeoConvert. <http://geoconvert.mimas.ac.uk>. 2010.  
9  
10
- 11 (29) Stack RJ, Mallen CD, Deighton C, Kiely P, Shaw KL, Booth A et al. The development and initial  
12 validation of a questionnaire to measure help-seeking behaviour in patients with new onset  
13 rheumatoid arthritis. *Health Expect* 2014; Jun(3):1-10.  
14
- 15 (30) Puchner R, Janetschko R, Kaiser W, Linkesch M, Steininger M, Termetsberger R et al. Efficacy  
16 and Outcome of Rapid Access Rheumatology Consultation: An Office-based Pilot Cohort  
17 Study. *Journal of Rheumatology* 2016; 43(6):1130-1135.  
18
- 19 (31) van Beers-Tas MH, ter Wee MM, van Tuyl LH, Maat B, Hoogland W, Hensvold AH, Catrina AI,  
20 Mosor E, Stamm TA, Finckh A, Courvoisier DS. Initial validation and results of the Symptoms  
21 in Persons At Risk of Rheumatoid Arthritis (SPARRA) questionnaire: a EULAR project. *RMD*  
22 open. 2018 May 1;4(1):e000641.  
23
- 24 (32) Muller S, Hider S, Machin A, Stack R, Hayward RA, Raza K, Mallen C. Searching for a  
25 prodrome for rheumatoid arthritis in the primary care record: A case-control study in the  
26 clinical practice research datalink. In Seminars in arthritis and rheumatism 2018 Jun 23. WB  
27 Saunders.  
28
- 29 (33) van Nies JA, Brouwer E, van Gaalen FA, Allaart CF, Huizinga TW, Posthumus MD et al.  
30 Improved early identification of arthritis: evaluating the efficacy of Early Arthritis  
31 Recognition Clinics. *Ann Rheum Dis* 2012; 72(8):1295-301.  
32
- 33 (34) Richardson JL, Langholz B, Bernstein L, Burciaga C, Danley K, Ross RK. Stage and delay in  
34 breast cancer diagnosis by race, socioeconomic status, age and year. *Br J Cancer* 1992;  
35 65(6):922-926.  
36
- 37 (35) Smith EC, Ziogas A, Anton-Culver H. Delay in surgical treatment and survival after breast  
38 cancer diagnosis in young women by race/ethnicity. *JAMA Surg* 2013; 148(6):516-523.  
39
- 40 (36) Griffiths B, Situnayake RD, Clark B, Tennant A, Salmon M, Emery P. Racial origin and its effect  
41 on disease expression and HLA-DRB1 types in patients with rheumatoid arthritis: a matched  
42 cross-sectional study. *Rheumatology (Oxford)* 2000; 39(8):857-864.  
43
- 44 (37) Kumar K, Daley E, Khattak F, Buckley CD, Raza K. The influence of ethnicity on the extent of,  
45 and reasons underlying, delay in general practitioner consultation in patients with RA.  
46 *Rheumatology (Oxford)* 2010; 49(5):1005-1012  
47  
48
- 49 (38) Tiwana R, Rowland J, Fincher M, Raza K, Stack RJ. Social interactions at the onset of  
50 rheumatoid arthritis and their influence on help-seeking behaviour: A qualitative  
51 exploration. *British journal of health psychology*. 2015 Sep;20(3):648-61.  
52
- 53 (39) Mølbæk K, Hørslev-Petersen K, Primdahl J. Diagnostic delay in rheumatoid arthritis: a  
54 qualitative study of symptom interpretation before the first visit to the doctor.  
55 *Musculoskeletal care*. 2016 Mar;14(1):26-36.  
56  
57  
58  
59

- 1  
2  
3 (40) Simons G, Mallen CD, Kumar K, Stack RJ, Raza K. A Qualitative Investigation of the Barriers to  
4 Help-seeking Among Members of the Public Presented with Symptoms of New-onset  
5 Rheumatoid Arthritis. *J Rheumatol* 2015; 42(4):585-592.  
6  
7 (41) Sheppard J, Kumar K, Buckley CD, Shaw KL, Raza K. 'I just thought it was normal aches and  
8 pains': a qualitative study of decision-making processes in patients with early rheumatoid  
9 arthritis. *Rheumatology (Oxford)* 2008; 47(10):1577-1582.  
10  
11 (42) Stack RJ, Shaw K, Mallen C, Herron-Marx S, Horne R, Raza K. Delays in help seeking at the  
12 onset of the symptoms of rheumatoid arthritis: a systematic synthesis of qualitative  
13 literature. *Ann Rheum Dis* 2012; 71(4):493-497.  
14  
15 (43) Townsend A, Wyke S, Hunt K. Self-managing and managing self: practical and moral  
16 dilemmas in accounts of living with chronic illness. *Chronic Illn* 2006; 2(3):185-194.  
17  
18 (44) Scott IC, Mangat N, MacGregor A, Raza K, Mallen CD, Hider SL. Primary care challenges in  
19 diagnosing and referring patients with suspected rheumatoid arthritis: a national cross-  
20 sectional GP survey. *Rheumatology Advances in Practice*. 2018 Apr 6;2(1):rky012.  
21  
22 (45) De Cock D, Meyfroidt S, Joly J, Van der Elst K, Westhovens R, Verschueren P. A detailed  
23 analysis of treatment delay from the onset of symptoms in early rheumatoid arthritis  
24 patients. *Scand J Rheumatol* 2014; 43(1):1-8.  
25  
26 (46) Simons G, Belcher J, Morton C, Kumar K, Falahee M, Mallen CD, Stack RJ, Raza K. Symptom  
27 Recognition and Perceived Urgency of Help-Seeking for Rheumatoid Arthritis and Other  
28 Diseases in the General Public: A Mixed Method Approach. *Arthritis care & research*. 2017  
29 May;69(5):633-41.  
30  
31  
32  
33  
34  
35  
36  
37  
38  
39  
40  
41  
42  
43  
44  
45  
46  
47  
48  
49  
50  
51  
52  
53  
54  
55  
56  
57  
58  
59  
60

## STROBE Statement—checklist of items that should be included in reports of observational studies

|                              | Item No | Recommendation                                                                                                                                                                             |                                      |
|------------------------------|---------|--------------------------------------------------------------------------------------------------------------------------------------------------------------------------------------------|--------------------------------------|
| Title and abstract           | 1       | (a) Indicate the study's design with a commonly used term in the title or the abstract                                                                                                     | Yes (Page 1)                         |
|                              |         | (b) Provide in the abstract an informative and balanced summary of what was done and what was found                                                                                        | Yes (page 4)                         |
| <b>Introduction</b>          |         |                                                                                                                                                                                            |                                      |
| Background/rationale         | 2       | Explain the scientific background and rationale for the investigation being reported                                                                                                       | Yes (pages 5-7)                      |
| Objectives                   | 3       | State specific objectives, including any prespecified hypotheses                                                                                                                           | Yes (pages 6-7)                      |
| <b>Methods</b>               |         |                                                                                                                                                                                            |                                      |
| Study design                 | 4       | Present key elements of study design early in the paper                                                                                                                                    | Yes (page 1, and page 7)             |
| Setting                      | 5       | Describe the setting, locations, and relevant dates, including periods of recruitment, exposure, follow-up, and data collection                                                            | Yes (page 7- 9)                      |
| Participants                 | 6       | (a) <i>Cohort study</i> —Give the eligibility criteria, and the sources and methods of selection of participants. Describe methods of follow-up                                            | Cross-sectional study – Yes (Page 7) |
|                              |         | <i>Case-control study</i> —Give the eligibility criteria, and the sources and methods of case ascertainment and control selection. Give the rationale for the choice of cases and controls |                                      |
| Variables                    | 7       | <i>Cross-sectional study</i> —Give the eligibility criteria, and the sources and methods of selection of participants                                                                      | Yes (page 7-8)                       |
|                              |         | (b) <i>Cohort study</i> —For matched studies, give matching criteria and number of exposed and unexposed                                                                                   |                                      |
|                              |         | <i>Case-control study</i> —For matched studies, give matching criteria and the number of controls per case                                                                                 |                                      |
| Data sources/<br>measurement | 8*      | For each variable of interest, give sources of data and details of methods of assessment (measurement). Describe comparability of assessment methods if there is more than one group       | Yes (page 7-8, also see table 1)     |
| Bias                         | 9       | Describe any efforts to address potential sources of bias                                                                                                                                  | Yes (Pages 17-22)                    |
| Study size                   | 10      | Explain how the study size was arrived at                                                                                                                                                  | N/A                                  |
| Quantitative variables       | 11      | Explain how quantitative variables were handled in the analyses. If applicable, describe which groupings were chosen and why                                                               | Yes (page 10)                        |
| Statistical methods          | 12      | (a) Describe all statistical methods, including those used to control for confounding                                                                                                      | Yes (page 10)                        |

|    |                                                             |     |
|----|-------------------------------------------------------------|-----|
| 1  |                                                             |     |
| 2  | (b) Describe any methods used to examine subgroups and      | Yes |
| 3  | interactions                                                |     |
| 4  | (c) Explain how missing data were addressed                 |     |
| 5  | (d) Cohort study—If applicable, explain how loss to follow- | N/A |
| 6  | up was addressed                                            |     |
| 7  | Case-control study—If applicable, explain how matching of   |     |
| 8  | cases and controls was addressed                            |     |
| 9  | Cross-sectional study—If applicable, describe analytical    |     |
| 10 | methods taking account of sampling strategy                 |     |
| 11 |                                                             |     |
| 12 | € Describe any sensitivity analyses                         |     |
| 13 |                                                             |     |

Continued on next page

For peer review only

1  
2  
3  
4  
5  
6  
7  
8  
9  
10  
11  
12  
13  
14  
15  
16  
17  
18  
19  
20  
21  
22  
23  
24  
25  
26  
27  
28  
29  
30  
31  
32  
33  
34  
35  
36  
37  
38  
39  
40  
41  
42  
43  
44  
45  
46  
47  
48  
49  
50  
51  
52  
53  
54  
55  
56  
57  
58  
59  
60**Results**

|                  |     |                                                                                                                                                                                                              |                   |
|------------------|-----|--------------------------------------------------------------------------------------------------------------------------------------------------------------------------------------------------------------|-------------------|
| Participants     | 13* | (a) Report numbers of individuals at each stage of study—eg numbers potentially eligible, examined for eligibility, confirmed eligible, included in the study, completing follow-up, and analysed            | Yes (pages 17-18) |
|                  |     | (b) Give reasons for non-participation at each stage                                                                                                                                                         | N/A               |
|                  |     | (c) Consider use of a flow diagram                                                                                                                                                                           | N/A               |
| Descriptive data | 14* | (a) Give characteristics of study participants (eg demographic, clinical, social) and information on exposures and potential confounders                                                                     | Yes (pages 17-18) |
|                  |     | (b) Indicate number of participants with missing data for each variable of interest                                                                                                                          | Yes (table 1)     |
|                  |     | (c) <i>Cohort study</i> —Summarise follow-up time (eg, average and total amount)                                                                                                                             |                   |
| Outcome data     | 15* | <i>Cohort study</i> —Report numbers of outcome events or summary measures over time                                                                                                                          | N/A               |
|                  |     | <i>Case-control study</i> —Report numbers in each exposure category, or summary measures of exposure                                                                                                         | N/A               |
|                  |     | <i>Cross-sectional study</i> —Report numbers of outcome events or summary measures                                                                                                                           | Yes               |
| Main results     | 16  | (a) Give unadjusted estimates and, if applicable, confounder-adjusted estimates and their precision (eg, 95% confidence interval). Make clear which confounders were adjusted for and why they were included | N/A               |
|                  |     | (b) Report category boundaries when continuous variables were categorized                                                                                                                                    | Yes (pages 17-18) |
|                  |     | (c) If relevant, consider translating estimates of relative risk into absolute risk for a meaningful time period                                                                                             | N/A               |
| Other analyses   | 17  | Report other analyses done—eg analyses of subgroups and interactions, and sensitivity analyses                                                                                                               | N/A               |

**Discussion**

|                  |    |                                                                                                                                                                            |                  |
|------------------|----|----------------------------------------------------------------------------------------------------------------------------------------------------------------------------|------------------|
| Key results      | 18 | Summarise key results with reference to study objectives                                                                                                                   | Yes (Page 22)    |
| Limitations      | 19 | Discuss limitations of the study, taking into account sources of potential bias or imprecision. Discuss both direction and magnitude of any potential bias                 | Yes (page 20)    |
| Interpretation   | 20 | Give a cautious overall interpretation of results considering objectives, limitations, multiplicity of analyses, results from similar studies, and other relevant evidence | Yes (page 20-22) |
| Generalisability | 21 | Discuss the generalisability (external validity) of the study results                                                                                                      | Yes (page 22)    |

**Other information**

|         |    |                                                                                                                                                               |               |
|---------|----|---------------------------------------------------------------------------------------------------------------------------------------------------------------|---------------|
| Funding | 22 | Give the source of funding and the role of the funders for the present study and, if applicable, for the original study on which the present article is based | Yes (page 25) |
|---------|----|---------------------------------------------------------------------------------------------------------------------------------------------------------------|---------------|

\*Give information separately for cases and controls in case-control studies and, if applicable, for exposed and unexposed groups in cohort and cross-sectional studies.

**Note:** An Explanation and Elaboration article discusses each checklist item and gives methodological background and published examples of transparent reporting. The STROBE checklist is best used in conjunction with this article (freely



1  
2 available on the Web sites of PLoS Medicine at <http://www.plosmedicine.org/>, Annals of Internal Medicine at  
3 <http://www.annals.org/>, and Epidemiology at <http://www.epidem.com/>). Information on the STROBE Initiative is  
4 available at [www.strobe-statement.org](http://www.strobe-statement.org).  
5  
6  
7  
8  
9  
10  
11  
12  
13  
14  
15  
16  
17  
18  
19  
20  
21  
22  
23  
24  
25  
26  
27  
28  
29  
30  
31  
32  
33  
34  
35  
36  
37  
38  
39  
40  
41  
42  
43  
44  
45  
46  
47  
48  
49  
50  
51  
52  
53  
54  
55  
56  
57  
58  
59  
60

For peer review only

# BMJ Open

## Delays between the onset of symptoms and first rheumatology consultation in patients with rheumatoid arthritis in the UK: an observational study

|                                 |                                                                                                                                                                                                                                                                                                                                                                                                                                                                                                                                                                                                                                                                                                                                                                           |
|---------------------------------|---------------------------------------------------------------------------------------------------------------------------------------------------------------------------------------------------------------------------------------------------------------------------------------------------------------------------------------------------------------------------------------------------------------------------------------------------------------------------------------------------------------------------------------------------------------------------------------------------------------------------------------------------------------------------------------------------------------------------------------------------------------------------|
| Journal:                        | <i>BMJ Open</i>                                                                                                                                                                                                                                                                                                                                                                                                                                                                                                                                                                                                                                                                                                                                                           |
| Manuscript ID                   | bmjopen-2018-024361.R2                                                                                                                                                                                                                                                                                                                                                                                                                                                                                                                                                                                                                                                                                                                                                    |
| Article Type:                   | Research                                                                                                                                                                                                                                                                                                                                                                                                                                                                                                                                                                                                                                                                                                                                                                  |
| Date Submitted by the Author:   | 29-Nov-2018                                                                                                                                                                                                                                                                                                                                                                                                                                                                                                                                                                                                                                                                                                                                                               |
| Complete List of Authors:       | Stack, Rebecca; Nottingham Trent University , Division of Psychology Nightingale, Peter; Queen Elizabeth Hospital Birmingham, Wellcome Trust Clinical Research Facility<br>Jinks, Clare; Keele University, Arthritis Research UK Primary Care Centre Study Syndicate, DELAY<br>Shaw, Karen; University of Birmingham, Institute of Applied Health Research<br>Herron-Marx, Sandy; Independent Research Consultant<br>Horne, Rob; UCL, UCL School of Pharmacy<br>Deighton, Chris; Derby Teaching Hospitals NHS Foundation Trust<br>Kiely, Patrick ; St George's University Hospitals NHS Foundation Trust<br>Mallen, Christian; Keele University, Arthritis Research UK Primary Care Centre<br>Raza, Karim; University of Birmingham, Institute of Inflammation and Ageing |
| <b>Primary Subject Heading</b>: | Rheumatology                                                                                                                                                                                                                                                                                                                                                                                                                                                                                                                                                                                                                                                                                                                                                              |
| Secondary Subject Heading:      | Health services research, Rheumatology                                                                                                                                                                                                                                                                                                                                                                                                                                                                                                                                                                                                                                                                                                                                    |
| Keywords:                       | RHEUMATOLOGY, access to care, help seeking, health service research, rheumatoid arthritis                                                                                                                                                                                                                                                                                                                                                                                                                                                                                                                                                                                                                                                                                 |
|                                 |                                                                                                                                                                                                                                                                                                                                                                                                                                                                                                                                                                                                                                                                                                                                                                           |

SCHOLARONE™  
Manuscripts

1  
2  
3 **Title: Delays between the onset of symptoms and first rheumatology consultation in**  
4  
5 **patients with rheumatoid arthritis in the UK: an observational study**  
6  
7  
8  
9

10 **Authors**

11  
12 Rebecca J Stack<sup>1,2</sup>, Peter Nightingale<sup>3</sup>, Clare Jinks<sup>4</sup>, (DELAY study syndicate), Karen Shaw<sup>5</sup>,  
13  
14 Sandy Herron-Marx<sup>6</sup>, Rob Horne<sup>7</sup>, Chris Deighton<sup>8</sup>, Patrick Kiely<sup>9</sup>, Christian D Mallen<sup>4</sup> and  
15  
16 Karim Raza<sup>1,10</sup>  
17  
18  
19  
20  
21  
22

23 **Department and Institutions**

- 24  
25 1. Institute of Inflammation and Ageing, University of Birmingham, UK.  
26  
27 2. Division of Psychology, Nottingham Trent University, Nottingham, UK  
28  
29 3. Wolfson Computer Laboratory, University Hospitals Birmingham NHS Foundation  
30  
31 Trust, Birmingham, UK.  
32  
33 4. Research Institute for Primary Care and Health Sciences, Keele University, UK.  
34  
35 5. Institute of Applied Health Research, University of Birmingham, UK  
36  
37 6. Independent Research Consultant, Brussels, Belgium.  
38  
39 7. School of Pharmacy, University of London, UK.  
40  
41 8. Department of Rheumatology, Derby Hospitals NHS Foundation Trust, Derby, UK.  
42  
43 9. Department of Rheumatology, St Georges University Hospital NHS Foundation Trust,  
44  
45 London, UK.  
46  
47 10. Department of Rheumatology, Sandwell and West Birmingham Hospitals NHS Trust,  
48  
49 Birmingham, UK.  
50  
51  
52  
53  
54  
55  
56  
57  
58  
59  
60

1  
2  
3 **Corresponding author**  
4  
5

6 Professor Karim Raza  
7

8 Rheumatology Research Group  
9

10 Institute of Inflammation and Ageing (IIA)  
11  
12

13 University of Birmingham  
14

15 Queen Elizabeth Hospital, Birmingham, B15 2WB  
16

17 E mail : [k.raza@bham.ac.uk](mailto:k.raza@bham.ac.uk)  
18  
19  
20  
21  
22

23 **Word Count** (excluding title page, abstract, references and tables): 2499  
24  
25  
26  
27  
28  
29

30 **Keywords**  
31

32 Rheumatoid arthritis; patient delay; Primary care delay; help-seeking; access to care;  
33  
34  
35  
36  
37  
38  
39  
40  
41  
42  
43  
44  
45  
46  
47  
48  
49  
50  
51  
52  
53  
54  
55  
56  
57  
58  
59  
60

1  
2  
3 **Strengths and limitations of this study.**  
4

5  
6 A key strength of this study is that it surveyed a large sample of patients with new onset  
7  
8 rheumatoid arthritis in the UK to identified delays in access to care.  
9

10  
11 Limitations include the fact that data were collected at the point of diagnosis and  
12  
13 information regarding key dates (in particular the onset of symptoms and presentation to  
14  
15 primary care) were reliant on patient recall.  
16  
17  
18  
19  
20  
21  
22  
23  
24  
25  
26  
27  
28  
29  
30  
31  
32  
33  
34  
35  
36  
37  
38  
39  
40  
41  
42  
43  
44  
45  
46  
47  
48  
49  
50  
51  
52  
53  
54  
55  
56  
57  
58  
59  
60

For peer review only

## Abstract

Objective: To investigate delays from symptom onset to rheumatology assessment for patients with a new onset of rheumatoid arthritis (RA) or unclassified arthritis.

Methods: Newly presenting adults with either RA or unclassified arthritis were recruited from rheumatology clinics. Data on the length of time between symptom onset and first seeing a GP (patient delay), between first seeing a GP and being referred to a rheumatologist (general practitioner delay) and being seen by a rheumatologist following referral (hospital delay) were captured.

Results: 822 patients participated (563 female, mean age 55 years). The median time between symptom onset and seeing a rheumatologist was 27.2 weeks (IQR 14.1–66 weeks); only 20% of patients were seen within the first 3 months following symptom onset. The median patient delay was 5.4 weeks (IQR 1.4–26.3 weeks). Patients who purchased over the counter medications or used ice/heat packs took longer to seek help than those who did not. In addition, those with a palindromic or an insidious symptom onset delayed for longer than those with a non-palindromic or acute onset. The median general practitioner delay was 6.9 weeks (IQR 2.3–20.3 weeks). Patients made a mean of 4 GP visits before being referred. The median hospital delay was 4.7 weeks (IQR 2.9–7.5 weeks).

Conclusion: This study identified delays at all levels in the pathway towards assessment by a Rheumatologist. However, delays in primary care were particularly long. Patient delay was driven by the nature of symptom onset. Complex multi-faceted interventions to promote rapid help seeking and to facilitate prompt onward referral from primary care should be developed.

## Introduction:

Rheumatoid arthritis (RA) is a chronic inflammatory disease affecting approximately 1% of the population.<sup>1,2</sup> Rheumatoid arthritis is associated with significant morbidity in large part as a consequence of extra-articular co-morbidities associated with systemic inflammation. In the UK it has been estimated that RA costs the NHS around £560 million per year and that additional costs to the economy of sick leave and work-related disability total £1.8 billion per year.<sup>3</sup> The first three months following the onset of RA symptoms represents an important therapeutic window.<sup>4</sup> Treatment during this phase improves long-term clinical outcomes, increasing the proportion of patients whose disease enters remission, reducing RA related joint damage and reducing the eventual need for joint replacement surgery.<sup>5-10</sup> Therefore, it is vital that patients are seen by Rheumatologists rapidly following the onset of RA symptoms to allow the rapid introduction of disease modifying anti-rheumatic drug treatment. However, despite increased recognition of the benefits of early treatment there remains considerable delay between symptom onset and the initiation of therapy.<sup>11-13</sup> Indeed a report by the UK's National Audit Office (NAO) in 2009 estimated that only 10% of patients with RA were treated within three months of symptom onset. The NAO's modelling suggested significant financial benefits for the broader economy and quality of life benefits for the individual if the proportion of patients treated earlier was increased.<sup>3</sup>

The patient's pathway to care can be delayed for a number of reasons, including delays on the part of the patient in recognising the significance of the early symptoms of RA.<sup>14-16</sup> Recent

1  
2  
3 research has linked patients' perceptions of RA and coping styles to the length of time taken  
4 to seek help.<sup>17</sup> Before seeking medical help from a physician, patients may seek help from a  
5 range of services including complementary therapists, pharmacists and telephone and on-line  
6 services. However, the use of these services at the onset of inflammatory arthritis has not  
7 been fully explored. Primary healthcare professionals often find the early symptoms of RA  
8 difficult to distinguish from those of other rheumatic diseases, making timely and appropriate  
9 referrals to rheumatologists challenging.<sup>18;19</sup> There may thus be delays in healthcare  
10 professionals making a referral to a Rheumatologist and also in assessment at the secondary  
11 care level, contributing further to the delay in making a diagnosis and commencing  
12 appropriate therapy.

13  
14  
15  
16  
17  
18  
19  
20  
21  
22  
23  
24  
25  
26  
27  
28  
29  
30 Several studies conducted across a range of countries have shown long delays between the  
31 onset of symptoms and a patient's first consultation with a rheumatologist.<sup>20-23</sup> However,  
32 data related to lengths of time between the onset of inflammatory musculoskeletal  
33 symptoms and first seeing a GP, between first seeing a GP and being referred to a  
34 rheumatologist and being seen by a rheumatologist following referral were not available  
35 across multiple NHS Trusts in multiple regions of the UK at the time of this study.

## 36 37 38 39 40 41 42 43 44 45 46 47 **Aim**

48  
49 The aim of this study was to investigate the extents of delay in assessment of patients with  
50 RA and unclassified arthritis. Specifically the study assessed extents of delay at the level of  
51 the patient in seeking help from the general practitioner, the general practitioner in  
52 referring to a Rheumatologist and the Rheumatologist in assessing the patient following  
53 referral. The relationships between extents of delay and clinical and demographic variables  
54  
55  
56  
57  
58  
59  
60



1  
2  
3 were explored and data captured relating to sources of information, help and advice utilized  
4  
5 by patients prior to GP consultation.  
6  
7  
8  
9

## 10 **Methods**

11  
12 A questionnaire based survey of consecutively presenting patients with a new onset of RA or  
13  
14 unclassified inflammatory arthritis was undertaken in England and Scotland. Networks such  
15  
16 as the Early Rheumatoid Arthritis Network<sup>24</sup> and the National Institute for Health Research  
17  
18 Clinical Research Network<sup>25</sup> were used identify Rheumatology centres to participate in this  
19  
20 study. RJS also promoted the study during abstract presentations at British Society for  
21  
22 Rheumatology meetings.  
23  
24  
25  
26  
27  
28  
29

30 Data were collected from Rheumatology departments in 34 NHS Trusts. Rheumatology  
31  
32 departments were secondary care based, although one rheumatology department  
33  
34 (Sandwell and West Birmingham Hospitals) operated clinics in both hospital and community  
35  
36 settings. Eligible patients were recruited on their first or second visit to the rheumatology  
37  
38 department following a primary care referral (data were not collected on the numbers of  
39  
40 patients whose data were collected at their first visit or at their second visit). Rheumatologists  
41  
42 were asked to approach consecutively presenting patients who met the eligibility criteria.  
43  
44  
45  
46 Eligible patients were newly referred adults (aged  $\geq 18$  years) with clinically apparent  
47  
48 synovial swelling of one or more joints who had either a new onset of RA (according to 2010  
49  
50 ACR / EULAR criteria <sup>26</sup>) or unclassified arthritis (UA; defined as a failure to fulfil classification  
51  
52 criteria for another inflammatory rheumatic disease). Patients with UA were recruited, as in  
53  
54 many cases patients with UA at initial secondary care assessment progress to RA over  
55  
56  
57  
58  
59 time.<sup>27</sup>  
60

1  
2  
3  
4  
5  
6 Data were collected using two questionnaires (available from the corresponding author on  
7  
8 request). First, following consent, the recruiting healthcare professional, with the patient  
9  
10 present, completed a questionnaire that captured data on extents of delays between [1]  
11  
12 symptom onset and seeing a healthcare professional (from herein referred to as 'patient  
13  
14 delay', these data was gathered from the patient's account by the recruiting healthcare  
15  
16 professional), [2] seeing a general practitioner and being referred to a rheumatologist (from  
17  
18 herein referred to as 'general practitioner e delay', these data was gathered from the  
19  
20 patient's account by the recruiting healthcare professional), and [3] being referred to a  
21  
22 rheumatologist and seeing a rheumatologist (from herein referred to as 'hospital delay',  
23  
24 these data were gathered from referral letters and hospital notes). Data were also gathered  
25  
26 on [1] demographic variables including the patient's age, gender, education, employment  
27  
28 status and postcode; deprivation ranks were calculated from postcode data using  
29  
30 Geoconvert 2010 which produced an Index of Multiple Deprivation (IMD) score,<sup>28</sup> [2] clinical  
31  
32 variables including the mode of symptom onset (palindromic (defined as intermittent  
33  
34 symptoms) vs. non-palindromic (defined as persistent symptoms)), rapidity of symptom  
35  
36 onset (acute vs. insidious; an acute onset was typically viewed as an onset of symptoms  
37  
38 which came on rapidly over 24-48 hours), duration of morning stiffness, swollen and tender  
39  
40 joint counts, Disease Activity Score 28 (DAS28) and fulfilment of 2010 ACR/EULAR criteria for  
41  
42 classification of RA<sup>26</sup>.

43  
44  
45  
46  
47  
48  
49  
50  
51  
52  
53  
54 In addition, via a separate questionnaire that patients completed by themselves, patients  
55  
56 provided data on actions taken in relation to their symptoms prior to seeking help from  
57  
58 primary care . The variables captured were informed by previous qualitative research,  
59  
60

1  
2  
3 including patient interviews and interviews with healthcare professionals. In addition, we  
4  
5 had input from Patient Research Partners and the questions asked were validated and  
6  
7 assessed for reliability<sup>29</sup>.  
8  
9

### 10 11 12 13 **Patient and Public Involvement**

14  
15 Patient and public involvement was an important element of this study. Patient  
16  
17 representatives from Sandwell and West Birmingham Hospitals NHS Trust were involved in  
18  
19 the study design, advised on the content of patient facing materials including participant  
20  
21 information sheets and consent forms and the content of questionnaires including  
22  
23 questions related to actions taken by patients prior to consulting their GPs. Patients were  
24  
25 members of the Project Management Group reviewing study recruitment and supporting  
26  
27 the Group in developing approaches to ensure that recruitment proceeded to time and  
28  
29 target  
30  
31  
32  
33  
34  
35  
36  
37

### 38 **Analysis**

39  
40  
41 To ensure that the data met parametric assumptions, the distribution and levels of  
42  
43 multicollinearity between variables were checked. Data on patient delays, general  
44  
45 practitioner delays and hospital delays were not normally distributed, therefore, log values  
46  
47 of these delay data were created to generate normally distributed variables.  
48  
49  
50

51  
52 For each of the outcomes patient delay, general practitioner delay and hospital delay a  
53  
54 general linear model was used with main effects and two-way interactions for the following  
55  
56 explanatory variables: gender, ethnicity, IMD score, age, education, employment status,  
57  
58 mode of onset, rapidity of onset, patient reported family history of RA and RA vs. UA. For  
59  
60

each outcome any two-way interactions which were not significant were removed in a backwards stepwise fashion, with the pairings with the highest p values being removed first. All main effects were retained, so that the final model for each outcome included all ten explanatory variables and any significant two-way interactions ( $p < 0.01$ ). All significant main effects and interactions are reported in the Results section.

## Results

### 1. Participant characteristics

Data were collected from 856 patients between 2011 and 2014. Patients were withdrawn from the study due to incomplete data (21 cases) and ineligibility (13 cases in whom there was no clinical synovitis reported at recruitment). Data were thus analysed from 822 patients of whom 68.5% were female with a mean age of 55 years. Characteristics of patients are presented in table 1.

**Table 1:** Demographic and disease related characteristics of patients. Data are presented as either percentage (number) or median (IQR) as appropriate. Tender joint count is out of 42 joints (10 PIP, 10 MCP, 2 wrist, 2 elbow, 2 shoulder, 2 hip, 2 knee, 2 ankle, 10 MTP). Swollen joint count is out of 40 joints (10 PIP, 10 MCP, 2 wrist, 2 elbow, 2 shoulder, 2 knee, 2 ankle, 10 MTP).

|                          |             |
|--------------------------|-------------|
| Female                   | 68.5% (563) |
| Age, years               | 57 (45-67)  |
| Diagnosis of RA          | 73% (603)   |
| Ethnicity: Black British | 6.0% (49)   |

|                                        |                   |
|----------------------------------------|-------------------|
| South Asian                            | 7.7% (63)         |
| White British                          | 84.9% (698)       |
| Other                                  | 1.5% (12)         |
| Self-reported family history of RA     | 34.9% (287)       |
| Palindromic onset                      | 42.8% (352)       |
| Acute onset                            | 35.9% (295)       |
| Duration of morning stiffness, minutes | 60 (10-120)       |
| DAS28                                  | 4.88 (3.98 -5.80) |
| HAQ                                    | 1.13 (0.50-1.73)  |
| Tender joint count                     | 9 (4-18)          |
| Swollen joint count                    | 5 (2-10)          |

## 2. Intervals between symptom onset and first rheumatology consultation

Overall the median time between symptom onset and seeing a rheumatologist was 27.2 weeks (IQR 14.1 – 66 weeks); only 20% of patients were seen within the first 3 months following symptom onset. The median patient delay was 5.4 weeks (IQR 1.4-26.3 weeks). The median general practitioner delay was 6.9 weeks (IQR 2.3–20.3 weeks) with patients making a mean of 4 GP visits before being referred. The median hospital delay was 4.7 weeks (IQR 2.9–7.5 weeks).

1  
2  
3 *Palindromic onset is defined as intermittent symptoms, while non-palindromic is defined as persistent*  
4 *symptoms. Acute onset defined as symptoms which came on rapidly over 24-48 hours, while insidious*  
5 *onset is defined as symptoms which developed slowly over an extended period of time. Patients*  
6  
7  
8  
9  
10 with a palindromic symptom onset had a significantly longer patient delay than those with a  
11  
12 non-palindromic onset (9.3 weeks (IQR 2-43 weeks) vs 4.3 weeks (IQR 1-17 weeks);  $p < 0.001$ ,  
13  
14 t-test). Furthermore, those with an acute symptom onset had significantly shorter patient  
15  
16 delays than those with an insidious symptoms onset (2.4 weeks (IQR 1 - 6.6 weeks) vs 11.1  
17  
18 weeks (IQR 4-44 weeks;  $p < 0.001$ , t-test).  
19  
20  
21  
22  
23  
24  
25

#### 26 *Resources used before seeking help from primary care*

27  
28  
29 Patients reported taking a range of actions in relation to their symptoms before seeking help  
30  
31 from their GP and in some cases these actions were associated with longer delays in GP  
32  
33 consultation (see table 2). Most often patients reported purchasing tablets from 'the  
34  
35 chemist', although only a small proportion actually reported speaking to a pharmacist.  
36  
37  
38 Other actions reported by patients included applying heat or cold packs to joints or buying  
39  
40 joint supports.  
41  
42  
43  
44  
45  
46  
47

48 **Table 2.** *Actions taken by patients with inflammatory arthritis before seeking help from their*  
49 *GP with comparison made for patient delay between those who did and did not undertake*  
50 *this action using independent t-tests; \* P value for comparison of those who did and did not*  
51 *undertake this action.*  
52  
53  
54  
55  
56  
57  
58  
59  
60

| Actions taken before seeking help from GP       | % (number) of participants undertaking this action | Median (IQR) patient delay in weeks for those undertaking this action | Median (IQR) patient delay in weeks for those not undertaking this action | P value  |
|-------------------------------------------------|----------------------------------------------------|-----------------------------------------------------------------------|---------------------------------------------------------------------------|----------|
| Bought tablets from the chemist                 | 51.1%<br>(273 out of 534)                          | 6.9 (2-30.7)                                                          | 4.7 (1.4-23)                                                              | p=0.036  |
| Used an ice or heat pack on joint               | 47.8%<br>(254 out of 531)                          | 7.6 (2-30.3)                                                          | 4.9 (2-26.1)                                                              | p=0.045  |
| Took baths                                      | 47.4%<br>(251 out of 529)                          | 6.3 (2-30.4)                                                          | 5.6 (2-26.1)                                                              | p=0.473  |
| Bought joint supports (splints, tubi-grips etc) | 37.4%<br>(198 out of 529)                          | 4.4 (2.1-18.6)                                                        | 5.1 (2-26.9)                                                              | p=0.362  |
| Used alternative therapies                      | 25.2%<br>(134 out of 531)                          | 8.3 (2-42.1)                                                          | 5.3 (2-26.3)                                                              | p=0.020  |
| Bought products from a health shop              | 19.0%<br>(101 out of 532)                          | 5.9 (2-36.3)                                                          | 5.9 (2-26)                                                                | p=0.182  |
| Modified diet                                   | 14.4%<br>(76 out of 529)                           | 6 (2.1-35.3)                                                          | 6.1(2-26.3)                                                               | p= 0.183 |

|                                          |                         |                |              |         |
|------------------------------------------|-------------------------|----------------|--------------|---------|
| Used prayer or sought spiritual guidance | 8.4%<br>(45 out of 534) | 4.4 (2.1-18.6) | 6.3 (2-26.9) | p=0.941 |
| Spoke to a pharmacist                    | 7.9%<br>(41 out of 521) | 5.9 (2-38.1)   | 5.9 (2-26.3) | p=0.544 |

Thirty-seven percent of patients reported looking on the internet (for example visiting the NHS direct website, BUPA website, Arthritis Research UK website and searching for information using search engines such as Google). Patients also reported seeking support via a telephone helpline; 5.7% described calling the NHS direct helpline or another telephone health advice service. 3.7% sought help in the workplace (e.g. from an occupational nurse), 2% of patients went directly to the Accident and Emergency Department and 1% attended an NHS walk-in centre.

### **Multivariate analysis: Patient delay**

The interaction model showed main effects for mode of onset (palindromic vs. non-palindromic;  $F=26.65$ ,  $P<0.01$ ) and rapidity of onset (acute vs. insidious;  $F=65.36$ ,  $P<0.01$ ). An interaction was found between palindromic onset and gender ( $F=45.658$ ,  $P<0.01$ ); men with a palindromic onset waited significantly longer before seeking help.



### **Multivariate analysis: General practitioner delay**

A main effect was found for ethnicity ( $F=6.26$ ,  $P<0.01$ ). Significant differences in general practitioner delay were found between White British and South Asian patients (6.2 weeks (IQR 2-18.6) vs 22 weeks (IQR 6.5-39.8);  $P<0.001$ ) and between White British and Black British patients (6.2 weeks (IQR 2-18.6) vs 11.1 weeks (IQR 4.3-21.7);  $P<0.001$ ). No significant difference was found between South Asian and Black British patients ( $P=1.000$ ).

A main effect was also found for family history ( $F=5.89$ ,  $P<0.01$ ); the median general practitioner delay for those with a self-reported family history of RA was 9 weeks (IQR 2.4-25.7), while general practitioner delay for those with no family history was 6.3 weeks (IQR 2.3-19). Interactions at a statistically significant level ( $<0.01$ ) were not found.

### **Multivariate analysis: Hospital delay**

The original model included main effects and two-way interactions for the following explanatory variables: gender, ethnicity, IMD score, age, education, employment status, mode of onset, rapidity of onset, family onset and RA vs. UA. None of the main effects or interactions (when removed backwards) were significant in predicting the delay between referral and being seen in secondary care.

## Discussion

International guidelines recommend that the treatment of RA should begin as soon as possible after the onset of symptoms, ideally aiming to capture patients within the first 3 months following symptom onset. However, this large UK study of delays in access to care for RA patients found that the median patient delay in seeking help at the onset of symptoms was 5.4 weeks, while the median delay between seeing a healthcare professional and being referred was 6.9 weeks. Our study highlights that only 20% of patients were seen within the first 3 months of symptom onset. This appears to be lower than the rate reported in other European countries for example a recent study in Austria reported that 38% of patients were seen within the first 3 months<sup>30</sup>. The present study also found an average delay of 4.7 weeks from referral until the patient was seen by a rheumatologist, similar to figures reported in the NAO report<sup>3</sup>. Unlike our previous study conducted at a single centre in the UK where patient delay accounted for the largest element of delay,<sup>13</sup> we found that GP delay was the largest contributor to overall delay; patient delay was less than we had previously reported in our single centre study.

This research highlights that delays in primary care are long, and a major contributor to overall delays between symptom onset and the first rheumatology visit. General practitioners are faced with a number of barriers to identifying patients with newly presenting RA including the often non-specific nature of symptoms at the earliest stages of RA.<sup>18</sup> Research is underway to define symptom complexes most predictive of RA development in patients with newly presenting musculoskeletal symptoms. For example, a questionnaire has been developed and validated to capture such symptoms in patients

1  
2  
3 presenting with joint symptoms which by history are suggestive of an underlying  
4  
5 inflammatory cause<sup>31</sup> and data are currently being collected from such patients in secondary  
6  
7 care based longitudinal observational cohort studies to identify symptoms that may predict  
8  
9 RA development. Furthermore an assessment of primary care databases has identified a  
10  
11 range of symptoms including hand related joint symptoms, morning stiffness and carpal  
12  
13 tunnel syndrome type symptoms as being ones with which patients frequently present to  
14  
15 the GP prior to the point at which the GP refers the patient to a Rheumatologist or records a  
16  
17 diagnosis of RA <sup>32</sup> It is likely that a combination of education, and evidence based referral  
18  
19 algorithms, will be needed to ensure that suspected cases are referred early. For example,  
20  
21 in Fife, Scotland GPs did not have access to rheumatoid factor testing during the course of  
22  
23 our study, and used guidelines with pictorial representations to help identify early synovitis  
24  
25 (personal communication Dr Helen Harris). Fife was a participating centre in this study, and  
26  
27 was found to have the lowest GP referral time of all centres surveyed. Furthermore,  
28  
29 facilitating access to secondary care, for example through the establishment of rapid  
30  
31 assessment clinics whose main aim is to identify whether the patient does or does not have  
32  
33 synovitis have been shown to significantly reduce delays in the assessment of patients.<sup>33</sup> A  
34  
35 limitation of our research is that the study was not able to assess regional differences across  
36  
37 NHS Trusts. A study comparing delays and referral patterns between hospitals with local  
38  
39 policies and practices which may influence the time between onset and first consultation  
40  
41 would be useful and an international study would be particularly helpful. In addition, this  
42  
43 study did not examine the distances between patients' homes and their local GP surgeries,  
44  
45 and hospital and so we were unable to assess whether physical distance between the  
46  
47 patient's home and the GP surgery or hospital influenced delay.  
48  
49  
50  
51  
52  
53  
54  
55  
56  
57  
58  
59  
60

1  
2  
3 A number of factors were found to influence GP delay including ethnicity. Studies in the field  
4  
5 of oncology have also found that people from ethnic minority backgrounds face longer GP  
6  
7 delays.<sup>34;35</sup> In the context of RA it is possible that the early symptomatology of patients from  
8  
9 ethnic minority backgrounds is different from, and less typical of RA than that of, patients of  
10  
11 white British background, thus making recognition more challenging for GPs. Data certainly  
12  
13 exist that the clinical phenotype of established RA differs in patients of South Asian origin  
14  
15 compared with patients of White British origin,<sup>36</sup> though data relating the clinical  
16  
17 presentations of RA in these groups are lacking. Furthermore, it is unclear why a self-  
18  
19 reported family history of RA would be associated with longer delays although it is  
20  
21 important to recognise that GPs may not have elicited this information from the patient.<sup>37</sup>  
22  
23 Qualitative approaches may be helpful to address some of these issues in the future.  
24  
25  
26  
27  
28  
29  
30  
31

32  
33 Previous qualitative studies and a meta-synthesis have identified barriers to help seeking at  
34  
35 the onset of RA.<sup>37-43</sup> The present study identifies that before seeking formal medical  
36  
37 attention, people experiencing the early symptoms of RA seek information and help from a  
38  
39 number of alternative sources and often self-medicate. We identified that buying tablets  
40  
41 from a pharmacy, and using heat or ice on joints was significantly associated with longer  
42  
43 patient delays. This finding highlights that some self-management behaviours, particularly  
44  
45 those linked to accessing pharmacy services can negatively impact on the time it takes to  
46  
47 seek help; this needs further exploration. Factors previously suggested to be associated  
48  
49 with delays in GP consultation included an insidious onset of mild symptoms and a lack of  
50  
51 knowledge about RA, personal susceptibility to RA and the availability of treatments to slow  
52  
53 disease progression. In our national sample 64.1% of people describe an insidious onset of  
54  
55 RA, and 42.8% describe a palindromic onset of RA. Therefore, majority large proportion of  
56  
57  
58  
59  
60

1  
2  
3 patients surveyed experienced a slow and / or intermittent onset of their inflammatory joint  
4  
5 symptoms. Our quantitative data are thus consistent with results from qualitative studies,  
6  
7 demonstrating that the mode and rapidity of onset of symptoms is significantly associated  
8  
9 with patient delays.  
10  
11

12  
13 This study has a number of limitations. Firstly, the interval between first consultation with a  
14  
15 Rheumatologist and initiation of disease modifying anti-rheumatic drug (DMARD) treatment  
16  
17 was not measured. Any additional delay in commencing DMARD treatment will negatively  
18  
19 impact the patient and variables associated with delays at this level should be assessed in  
20  
21 future studies. Secondly, during the course of this study a number of guidelines related to  
22  
23 RA management were published which may have influenced practice, and patterns of  
24  
25 referral. We were not able to explore the relationships between the availability / local  
26  
27 adoption of guidelines and delays in the assessment of patients. Future investigation should  
28  
29 assess the impact of policy changes on patterns of help-seeking, referral and assessment.  
30  
31  
32 Thirdly, the rheumatology centres participating in this study were self-selecting, therefore,  
33  
34 there may be biases in the characteristics of the rheumatology centres which participated in  
35  
36 this study. For example, the participating rheumatology units may have had a particular  
37  
38 interest in early arthritis. Only a study which recruited consecutive patients from all  
39  
40 rheumatology units across the UK would be able to provide a truly national picture.  
41  
42  
43 Fourthly, whilst we were able to document the length of delay at a primary care level there  
44  
45 were important variables which may have influenced this delay which we did not record and  
46  
47 so were unable to explore. For example it would have been helpful have access to results  
48  
49 tests performed in primary care to assess whether levels of inflammatory markers or RA  
50  
51 related autoantibodies measured in primary care influenced the rapidity of referral from  
52  
53 primary care. Indeed a recent quantitative survey of GPs' anticipated actions in primary care  
54  
55  
56  
57  
58  
59  
60

1  
2  
3 when dealing with patients with suspected RA suggest that results of these tests may  
4 influence GP behaviours<sup>44</sup>. Future research should address this. Similarly, a number of  
5 secondary care related variables may have influenced the extent of secondary care delay  
6 including the number of rheumatologists at each Trust, whether a dedicated early arthritis  
7 clinic was in place and approaches taken to the triage of referrals. Data relating to these  
8 variables were not collected though future work addressing issues of delay should address  
9 these important issues. Fifthly, data relating to the dates of onset of symptoms and initial  
10 GP consultation were gathered from patients' histories, and therefore relied on patient  
11 recollection with a possible associated error. However, a previous study addressing delays in  
12 the assessment of patients with RA, compared patient accounts of their journeys to first  
13 rheumatology consultation against medical records and highlighted the accuracy of patient  
14 recollection in relation to dates found to be documented in primary care records<sup>45</sup>. This, to  
15 some extent, validates our approach of using patient memory to define the dates of  
16 symptom onset and initial GP presentation. An alternative approach would be a  
17 longitudinal observational study in the general population to track the development of  
18 symptoms and the relationship between that and GP consultation, GP referral and  
19 secondary care assessment. A challenge with this approach is the low incidence of RA and  
20 thus the requirement for a very large sample size. One could potentially enrich the  
21 population for RA risk by, for example, following individuals who are at increased risk of RA  
22 (e.g. the first degree relatives of patients with RA). However, one of the challenges with this  
23 strategy is that simply being involved in such a study may influence subsequent patient and  
24 GP behaviour.

1  
2  
3 Whilst delays in primary care are the largest contributor to overall delay, patient delay and  
4 hospital delay represent important components. This study found that the nature of  
5 symptoms onset influenced how quickly patients with RA sought help, suggesting that those  
6 with an acute onset of persistent symptoms seek help faster than those with insidious and  
7 palindromic onsets. Interventions to encourage rapid help seeking should consider  
8 highlighting the frequently insidious onset of RA to members of the public stressing that  
9 help should be sought even when symptoms are mild. However, even those with a rapid  
10 onset of persistent symptoms often delayed for prolonged periods before seeking help. We  
11 have previously shown that members of the public view musculoskeletal symptoms, even  
12 those with clear inflammatory features, as less worrisome and less requiring rapid  
13 assessment as compared with symptoms of other common diseases such as ischaemic type  
14 chest pain or bowel disturbance with associated rectal blood loss<sup>46</sup>. Enhanced public  
15 education to highlight the significance of inflammatory type musculoskeletal symptoms is  
16 thus likely to be needed. Interventions at multiple levels, including at the levels of the  
17 public, the services which members of the public consult after the onset of symptoms (e.g.  
18 pharmacies), primary care and secondary care will be needed to reduce overall delays in  
19 access to appropriate specialists.  
20  
21  
22  
23  
24  
25  
26  
27  
28  
29  
30  
31  
32  
33  
34  
35  
36  
37  
38  
39  
40  
41  
42  
43  
44  
45  
46  
47  
48  
49  
50  
51  
52  
53  
54  
55  
56  
57  
58  
59  
60

1  
2  
3  
4  
5  
6  
7  
8  
9  
10  
11  
12  
13  
14  
15  
16  
17  
18  
19  
20  
21  
22  
23  
24  
25  
26  
27  
28  
29  
30  
31  
32  
33  
34  
35  
36  
37  
38  
39  
40  
41  
42  
43  
44  
45  
46  
47  
48  
49  
50  
51  
52  
53  
54  
55  
56  
57  
58  
59  
60

For peer review only



### Competing interests

No competing Interest:

### Contributorship

RJS, CJ, SHM, CDM, KS, RH, CD, PK and KR made substantial contributions to the conception or design of the work. The acquisition of data was undertaken by RJS, KR, PK and CD. RJS, CJ and SHM facilitated patient and public involvement in the design, delivery and interpretation of this study. The analysis and interpretation of data were undertaken by RJS, PN and KR. RJS, PN, CJ, SHM, CDM, KS, RH, CD, PK and KR were involved in drafting the work and revising it critically for important intellectual content. RJS, CJ, SHM, CDM, KS, RH, CD, PK and KR gave final approval of the version published. All authors agree to be accountable for all aspects of the work in ensuring that questions related to the accuracy or integrity of any part of the work are appropriately investigated and resolved.

### Acknowledgements

We would like to thank the staff at the rheumatology departments who collected data for this study. We would also like to thank patient research partners at Sandwell and West Birmingham Hospitals NHS Trust for their help and support with this study.

### Funding information

This article presents independent research funded in part by the National Institute for Health Research (NIHR) under the Research for Patient Benefit Programme (funder's reference PB-PG-1208-18114). CDM is funded by the National Institute for Health Research (NIHR) Collaborations for Leadership in Applied Health Research and Care West Midlands, the NIHR School for Primary Care Research and a NIHR Research Professorship in General Practice (NIHR-RP-2014-04-026). CJ is part-funded by the NIHR Collaborations for Leadership in Applied Health Research and Care West Midlands. RH is part-funded by North Thames CLAHRC and his contribution was also supported by an NIHR Senior Investigator Award. KS is funded by the NIHR CLAHRC West Midlands initiative. The views expressed in this publication are those of the authors and not necessarily those of the NHS, the National Institute for Health Research or the Department of Health and Social Care.

**Ethical approval information** Ethical approval was obtained from South Birmingham Research Ethics Committee (reference no. 10/H1207/98) and all participants gave written

1  
2  
3 informed consent. Data was stored in a secure location and protected by multiple security  
4 systems.  
5  
6  
7

### 8 **Data sharing statement**

9  
10 Data are available upon request from the corresponding author.  
11  
12

### 13 **Exclusive Licence**

14  
15 I, the Submitting Author has the right to grant and does grant on behalf of all authors of the  
16 Work (as defined in the below author licence), an exclusive licence and/or a non-exclusive  
17 licence for contributions from authors who are: i) UK Crown employees; ii) where BMJ has  
18 agreed a CC-BY licence shall apply, and/or iii) in accordance with the terms applicable for US  
19 Federal Government officers or employees acting as part of their official duties; on a  
20 worldwide, perpetual, irrevocable, royalty-free basis to BMJ Publishing Group Ltd (“BMJ”) its  
21 licensees and where the relevant Journal is co-owned by BMJ to the co-owners of the  
22 Journal, to publish the Work in BMJ Open and any other BMJ products and to exploit all  
23 rights, as set out in our [licence](#).  
24  
25  
26  
27  
28  
29  
30  
31  
32  
33

34 The Submitting Author accepts and understands that any supply made under these terms is  
35 made by BMJ to the Submitting Author unless you are acting as an employee on behalf of  
36 your employer or a postgraduate student of an affiliated institution which is paying any  
37 applicable article publishing charge (“APC”) for Open Access articles. Where the Submitting  
38 Author wishes to make the Work available on an Open Access basis (and intends to pay the  
39 relevant APC), the terms of reuse of such Open Access shall be governed by a Creative  
40 Commons licence – details of these licences and which [Creative Commons](#) licence will apply  
41 to this Work are set out in our licence referred to above.  
42  
43  
44  
45  
46  
47  
48  
49  
50

### 51 **Non-author contributors - Delay study syndicate**

52  
53  
54 Sandwell and West Birmingham Hospitals NHS Trust: Biruk Asfaw, Sabrina Kapoor, Kanta  
55 Kumar, Adam Slater & Christopher Buckley  
56  
57

58 Derby Teaching Hospitals NHS Foundation Trust: Chris Deighton & Alison Booth  
59  
60

1  
2  
3 Nottingham University Hospitals NHS Trust: Marie-Josophe Pradere, Ira Pande & Ian  
4  
5 Gaywood  
6  
7 St George's University Hospitals NHS Trust: Francesca Leone & Patrick Keily  
8  
9 Lancaster Teaching Hospitals NHS Foundation Trust: Bronwen Evans & Marwan Bukhari  
10  
11 Poole Hospitals NHS Foundation Trust: Julia Taylor, Helena Knowles, & Sarah Westlake  
12  
13 University Hospitals Coventry and Warwickshire NHS Trust: Tanya Potter  
14  
15 Sherwood Forest Hospitals NHS Foundation Trust: Debbie Wilson, Jayne Smith & David  
16  
17 Walsh  
18  
19 King's College Hospitals NHS Foundation Trust: Nyarko Ahwireng, Audu Aderonke & David  
20  
21 Scott  
22  
23 Guy's and St Thomas NHS Foundation Trust: Louise Nel, Naomi Hare & Andrew Cope  
24  
25 North Bristol NHS Trust: Julie Taylor, Wendy Wilmott & Paul Creamer  
26  
27 West Hertfordshire Hospitals NHS Trust: Lynn Currie, Adam Young & Karen Markwell  
28  
29 Lewisham and Greenwich NHS Trust: Louise Pollard & Debbie Johnson  
30  
31 Royal Surrey Country NHS Foundation Trust: Stephanie Allen & Raad Makadsi  
32  
33 Hampshire Hospitals NHS Foundations Trust: Peter Prouse & Janet Cushnaghan  
34  
35 University Hospitals of Leicester NHS Trust: Jessy Sabu & Moorthy Arumugam  
36  
37 County Durham and Darlington NHS Foundation Trust: Matt Bridges & Pam Race  
38  
39 Weston Area Health NHS Trust: Dawn Symonds & Matt Bridges  
40  
41 University Hospitals Birmingham NHS Foundation Trust: Jackie Cobb, Andrew Filer, Simon  
42  
43 Bowman & Paresh Jobanputra  
44  
45 Royal Wolverhampton Hospital NHS Trust (at the time of recruitment the hospital from  
46  
47 which patients were recruited was within the Mid Staffordshire NHS Foundation Trust) :  
48  
49 Julie Edwards & Tom Sheeran  
50  
51 East Kent Hospitals University NHS Foundation Trust: Caroline Crowley & Imad Jassim  
52  
53 University Hospitals of the North Midlands NHS Trust: Julie Gray & Jon Packham  
54  
55 NHS Fife: Paul Allcoat & Helen Harris  
56  
57 Yeovil District Hospital NHS Foundation Trust: Rebecca Rowland & Sally Knights  
58  
59 Northumbria Healthcare NHS Foundation Trust AND The Newcastle Upon Tyne Hospitals  
60  
NHS Foundation Trust: Peta Heslop, Sandra Robinson, David Walker, Heather Russell &  
Sheryl Mitchell  
Chesterfield Royal Hospital NHS Foundation Trust: Heather Cripps & Kevin Fairburn

1  
2  
3 Lancashire Teaching Hospitals NHS Foundation Trust AND East Lancashire Hospital NHS

4  
5 Trust: Sue Cotterell, Gillian Welch, Ayesha Madan & Lee Suan Teh

6  
7 Cambridge University Hospitals NHS Foundation Trust: Lucy Winstanley & Shweta Bhagat

8  
9 The Dudley Group NHS Foundation Trust: Lucy Kadiki, Chitra Ramful & Ravinder Sandhu

10  
11 Royal Cornwall Hospitals NHS Trust: Amanda Datson,& Anthony Woolf

12  
13  
14  
15  
16  
17  
18  
19  
20  
21  
22  
23  
24  
25  
26  
27  
28  
29  
30  
31  
32  
33  
34  
35  
36  
37  
38  
39  
40  
41  
42  
43  
44  
45  
46  
47  
48  
49  
50  
51  
52  
53  
54  
55  
56  
57  
58  
59  
60

For peer review only

## Reference List

- (1) Humphreys JH, Verstappen SM, Hyrich KL, Chipping JR, Marshall T, Symmons DP. The incidence of rheumatoid arthritis in the UK: comparisons using the 2010 ACR/EULAR classification criteria and the 1987 ACR classification criteria. Results from the Norfolk Arthritis Register. *Ann Rheum Dis* 2012; 72(8):1315-1320.
- (2) Symmons D, Turner G, Webb R, Asten P, Barrett E, Lunt M et al. The prevalence of rheumatoid arthritis in the United Kingdom: new estimates for a new century. *Rheumatology (Oxford)* 2002; 41(7):793-800.
- (3) National Audit Office. Services for people with rheumatoid arthritis. National Audit Office . 2009. London, The Stationery Office. 24-1-2013.
- (4) van Nies JA, Tsonaka R, Gaujoux-Viala C, Fautrel B, van der Helm-van Mil AH. Evaluating relationships between symptom duration and persistence of rheumatoid arthritis: does a window of opportunity exist? Results on the Leiden Early Arthritis Clinic and ESPOIR cohorts. *Ann Rheum Dis* 2015; 74(5):806-812.
- (5) Feldman DE, Bernatsky S, Houde M, Beauchamp ME, Abrahamowicz M. Early consultation with a rheumatologist for RA: does it reduce subsequent use of orthopaedic surgery? *Rheumatology (Oxford)* 2013; 52(3):452-459.
- (6) Nell VP, Machold KP, Eberl G, Stamm TA, Uffmann M, Smolen JS. Benefit of very early referral and very early therapy with disease-modifying anti-rheumatic drugs in patients with early rheumatoid arthritis. *Rheumatology (Oxford)* 2004; 43(7):906-914.
- (7) Raza K, Buckley CE, Salmon M, Buckley CD. Treating very early rheumatoid arthritis. *Best Pract Res Clin Rheumatol* 2006; 20(5):849-863.
- (8) Raza K, Filer A. The therapeutic window of opportunity in rheumatoid arthritis: does it ever close? *Ann Rheum Dis* 2015; 74(5):793-794.
- (9) Scott DL, Hunter J, Deighton C, Scott DG, Isenberg D. Treatment of rheumatoid arthritis is good medicine. *BMJ* 2011; 343:d6962.
- (10) van der Linden MP, le Cessie S, Raza K, van der Woude D, Knevel R, Huizinga TW et al. Long-term impact of delay in assessment of patients with early arthritis. *Arthritis Rheum* 2010; 62(12):3537-3546.
- (11) Feldman DE, Bernatsky S, Haggerty J, Leffondre K, Tousignant P, Roy Y et al. Delay in consultation with specialists for persons with suspected new-onset rheumatoid arthritis: a population-based study. *Arthritis Rheum* 2007; 57(8):1419-1425.
- (12) Kiely P, Williams R, Walsh D, Young A. Contemporary patterns of care and disease activity outcome in early rheumatoid arthritis: the ERAN cohort. *Rheumatology (Oxford)* 2009; 48(1):57-60.
- (13) Kumar K, Daley E, Carruthers DM, Situnayake D, Gordon C, Grindulis K et al. Delay in presentation to primary care physicians is the main reason why patients with rheumatoid arthritis are seen late by rheumatologists. *Rheumatology (Oxford)* 2007; 46(9):1438-1440.

- 1  
2  
3  
4  
5  
6  
7  
8  
9  
10  
11  
12  
13  
14  
15  
16  
17  
18  
19  
20  
21  
22  
23  
24  
25  
26  
27  
28  
29  
30  
31  
32  
33  
34  
35  
36  
37  
38  
39  
40  
41  
42  
43  
44  
45  
46  
47  
48  
49  
50  
51  
52  
53  
54  
55  
56  
57  
58  
59  
60
- (14) Stack RJ, Simons G, Kumar K, Mallen CD, Raza K. Patient delays in seeking help at the onset of rheumatoid arthritis: the problem, its causes and potential solutions. *Aging Health* 2013; 9(4):425-435.
  - (15) Oliver S, Bosworth A, Airoldi M, Bunyan H, Callum A, Dixon J et al. Exploring the healthcare journey of patients with rheumatoid arthritis: a mapping project - implications for practice. *Musculoskeletal Care* 2008; 6(4):247-266.
  - (16) Villeneuve E, Nam JL, Bell MJ, Deighton CM, Felson DT, Hazes JM et al. A systematic literature review of strategies promoting early referral and reducing delays in the diagnosis and management of inflammatory arthritis. *Ann Rheum Dis* 2012; 27(1):13-22.
  - (17) Van der Elst K, De CD, Vecoven E, Arat S, Meyfroidt S, Joly J et al. Are illness perception and coping style associated with the delay between symptom onset and the first general practitioner consultation in early rheumatoid arthritis management? An exploratory study within the CareRA trial. *Scand J Rheumatol* 2015;1-8.
  - (18) Stack RJ, Llewellyn Z, Deighton C, Kiely P, Mallen CD, Raza K. General practitioners' perspectives on campaigns to promote rapid help-seeking behaviour at the onset of rheumatoid arthritis. *Scand J Prim Health Care* 2014; 32(1):37-43.
  - (19) Stack RJ, Shani M, Mallen CD, Raza K. Symptom complexes at the earliest phases of rheumatoid arthritis: a synthesis of the qualitative literature. *Arthritis Care Res* 2013; 65(12):1916-1926.
  - (20) De Cock D, Meyfroidt S, Joly J, Van der Elst K, Westhovens R, Verschueren P. A detailed analysis of treatment delay from the onset of symptoms in early rheumatoid arthritis patients. *Scand J Rheumatol* 2014; 43(1):1-8
  - (21) van Nies JA, Brouwer E, de Rooy DP, van Gaalen FA, Huizinga TW, Posthumus MD et al. Reasons for medical help-seeking behaviour of patients with recent-onset arthralgia. *Ann Rheum Dis* 2013; 72(8):1302-1307.
  - (22) Zafar S, Badsha H, Mofti A, Delosantos A, Altares J, Matudio G et al. Efforts to increase public awareness may result in more timely diagnosis of rheumatoid arthritis. *J Clin Rheumatol* 2012; 18(6):279-282.
  - (23) Nanji JA, Choi M, Ferrari R, Lyddell C, Russell AS. Time to consultation and disease-modifying antirheumatic drug treatment of patients with rheumatoid arthritis--northern Alberta perspective. *J Rheumatol* 2012; 39(4):707-711.
  - (24) Garwood W. The Early Rheumatoid Arthritis Network (ERAN). *Musculoskeletal care*. 2004 Nov;2(4):240-4.
  - (25) The National Institute for Health Research Clinical Research Network. <https://www.nihr.ac.uk/about-us/how-we-are-managed/managing-centres/crn/> (accessed 16<sup>th</sup> August 2018)
  - (26) Aletaha D, Neogi T, Silman AJ, Funovits J, Felson DT, Bingham CO, III et al. 2010 rheumatoid arthritis classification criteria: an American College of Rheumatology/European League Against Rheumatism collaborative initiative. *Ann Rheum Dis* 2010; 69(9):1580-1588.

- 1  
2  
3 (27) van der Helm-van Mil AH, Detert J, le Cessie S, Filer A, Bastian H, Burmester GR et al.  
4 Validation of a prediction rule for disease outcome in patients with recent-onset  
5 undifferentiated arthritis: moving toward individualized treatment decision-making. *Arthritis*  
6 *Rheum* 2008; 58(8):2241-2247.  
7  
8 (28) Midas. GeoConvert. <http://geoconvert.mimas.ac.uk>. 2010.  
9  
10  
11 (29) Stack RJ, Mallen CD, Deighton C, Kiely P, Shaw KL, Booth A et al. The development and initial  
12 validation of a questionnaire to measure help-seeking behaviour in patients with new onset  
13 rheumatoid arthritis. *Health Expect* 2014; Jun(3):1-10.  
14  
15 (30) Puchner R, Janetschko R, Kaiser W, Linkesch M, Steininger M, Termetsberger R et al. Efficacy  
16 and Outcome of Rapid Access Rheumatology Consultation: An Office-based Pilot Cohort  
17 Study. *Journal of Rheumatology* 2016; 43(6):1130-1135.  
18  
19 (31) van Beers-Tas MH, ter Wee MM, van Tuyl LH, Maat B, Hoogland W, Hensvold AH, Catrina AI,  
20 Mosor E, Stamm TA, Finckh A, Courvoisier DS. Initial validation and results of the Symptoms  
21 in Persons At Risk of Rheumatoid Arthritis (SPARRA) questionnaire: a EULAR project. *RMD*  
22 open. 2018 May 1;4(1):e000641.  
23  
24 (32) Muller S, Hider S, Machin A, Stack R, Hayward RA, Raza K, Mallen C. Searching for a  
25 prodrome for rheumatoid arthritis in the primary care record: A case-control study in the  
26 clinical practice research datalink. In Seminars in arthritis and rheumatism 2018 Jun 23. WB  
27 Saunders.  
28  
29 (33) van Nies JA, Brouwer E, van Gaalen FA, Allaart CF, Huizinga TW, Posthumus MD et al.  
30 Improved early identification of arthritis: evaluating the efficacy of Early Arthritis  
31 Recognition Clinics. *Ann Rheum Dis* 2012; 72(8):1295-301.  
32  
33 (34) Richardson JL, Langholz B, Bernstein L, Burciaga C, Danley K, Ross RK. Stage and delay in  
34 breast cancer diagnosis by race, socioeconomic status, age and year. *Br J Cancer* 1992;  
35 65(6):922-926.  
36  
37 (35) Smith EC, Ziogas A, Anton-Culver H. Delay in surgical treatment and survival after breast  
38 cancer diagnosis in young women by race/ethnicity. *JAMA Surg* 2013; 148(6):516-523.  
39  
40 (36) Griffiths B, Situnayake RD, Clark B, Tennant A, Salmon M, Emery P. Racial origin and its effect  
41 on disease expression and HLA-DRB1 types in patients with rheumatoid arthritis: a matched  
42 cross-sectional study. *Rheumatology (Oxford)* 2000; 39(8):857-864.  
43  
44 (37) Kumar K, Daley E, Khattak F, Buckley CD, Raza K. The influence of ethnicity on the extent of,  
45 and reasons underlying, delay in general practitioner consultation in patients with RA.  
46 *Rheumatology (Oxford)* 2010; 49(5):1005-1012  
47  
48 (38) Tiwana R, Rowland J, Fincher M, Raza K, Stack RJ. Social interactions at the onset of  
49 rheumatoid arthritis and their influence on help-seeking behaviour: A qualitative  
50 exploration. *British journal of health psychology*. 2015 Sep;20(3):648-61.  
51  
52 (39) Mølbæk K, Hørslev-Petersen K, Primdahl J. Diagnostic delay in rheumatoid arthritis: a  
53 qualitative study of symptom interpretation before the first visit to the doctor.  
54 *Musculoskeletal care*. 2016 Mar;14(1):26-36.  
55  
56  
57  
58  
59  
60

- 1  
2  
3 (40) Simons G, Mallen CD, Kumar K, Stack RJ, Raza K. A Qualitative Investigation of the Barriers to  
4 Help-seeking Among Members of the Public Presented with Symptoms of New-onset  
5 Rheumatoid Arthritis. *J Rheumatol* 2015; 42(4):585-592.  
6  
7 (41) Sheppard J, Kumar K, Buckley CD, Shaw KL, Raza K. 'I just thought it was normal aches and  
8 pains': a qualitative study of decision-making processes in patients with early rheumatoid  
9 arthritis. *Rheumatology (Oxford)* 2008; 47(10):1577-1582.  
10  
11 (42) Stack RJ, Shaw K, Mallen C, Herron-Marx S, Horne R, Raza K. Delays in help seeking at the  
12 onset of the symptoms of rheumatoid arthritis: a systematic synthesis of qualitative  
13 literature. *Ann Rheum Dis* 2012; 71(4):493-497.  
14  
15 (43) Townsend A, Wyke S, Hunt K. Self-managing and managing self: practical and moral  
16 dilemmas in accounts of living with chronic illness. *Chronic Illn* 2006; 2(3):185-194.  
17  
18 (44) Scott IC, Mangat N, MacGregor A, Raza K, Mallen CD, Hider SL. Primary care challenges in  
19 diagnosing and referring patients with suspected rheumatoid arthritis: a national cross-  
20 sectional GP survey. *Rheumatology Advances in Practice*. 2018 Apr 6;2(1):rky012.  
21  
22 (45) De Cock D, Meyfroidt S, Joly J, Van der Elst K, Westhovens R, Verschueren P. A detailed  
23 analysis of treatment delay from the onset of symptoms in early rheumatoid arthritis  
24 patients. *Scand J Rheumatol* 2014; 43(1):1-8.  
25  
26 (46) Simons G, Belcher J, Morton C, Kumar K, Falahee M, Mallen CD, Stack RJ, Raza K. Symptom  
27 Recognition and Perceived Urgency of Help-Seeking for Rheumatoid Arthritis and Other  
28 Diseases in the General Public: A Mixed Method Approach. *Arthritis care & research*. 2017  
29 May;69(5):633-41.  
30  
31  
32  
33  
34  
35  
36  
37  
38  
39  
40  
41  
42  
43  
44  
45  
46  
47  
48  
49  
50  
51  
52  
53  
54  
55  
56  
57  
58  
59  
60



## STROBE Statement—checklist of items that should be included in reports of observational studies

|                              | Item No | Recommendation                                                                                                                                                                             |                                      |
|------------------------------|---------|--------------------------------------------------------------------------------------------------------------------------------------------------------------------------------------------|--------------------------------------|
| Title and abstract           | 1       | (a) Indicate the study's design with a commonly used term in the title or the abstract                                                                                                     | Yes (Page 1)                         |
|                              |         | (b) Provide in the abstract an informative and balanced summary of what was done and what was found                                                                                        | Yes (page 4)                         |
| <b>Introduction</b>          |         |                                                                                                                                                                                            |                                      |
| Background/rationale         | 2       | Explain the scientific background and rationale for the investigation being reported                                                                                                       | Yes (pages 5-7)                      |
| Objectives                   | 3       | State specific objectives, including any prespecified hypotheses                                                                                                                           | Yes (pages 6-7)                      |
| <b>Methods</b>               |         |                                                                                                                                                                                            |                                      |
| Study design                 | 4       | Present key elements of study design early in the paper                                                                                                                                    | Yes (page 1, and page 7)             |
| Setting                      | 5       | Describe the setting, locations, and relevant dates, including periods of recruitment, exposure, follow-up, and data collection                                                            | Yes (page 7- 9)                      |
| Participants                 | 6       | (a) <i>Cohort study</i> —Give the eligibility criteria, and the sources and methods of selection of participants. Describe methods of follow-up                                            | Cross-sectional study – Yes (Page 7) |
|                              |         | <i>Case-control study</i> —Give the eligibility criteria, and the sources and methods of case ascertainment and control selection. Give the rationale for the choice of cases and controls |                                      |
|                              |         | <i>Cross-sectional study</i> —Give the eligibility criteria, and the sources and methods of selection of participants                                                                      |                                      |
|                              |         | (b) <i>Cohort study</i> —For matched studies, give matching criteria and number of exposed and unexposed                                                                                   |                                      |
|                              |         | <i>Case-control study</i> —For matched studies, give matching criteria and the number of controls per case                                                                                 |                                      |
| Variables                    | 7       | Clearly define all outcomes, exposures, predictors, potential confounders, and effect modifiers. Give diagnostic criteria, if applicable                                                   | Yes (page 7-8)                       |
| Data sources/<br>measurement | 8*      | For each variable of interest, give sources of data and details of methods of assessment (measurement). Describe comparability of assessment methods if there is more than one group       | Yes (page 7-8, also see table 1)     |
| Bias                         | 9       | Describe any efforts to address potential sources of bias                                                                                                                                  | Yes (Pages 17-22)                    |
| Study size                   | 10      | Explain how the study size was arrived at                                                                                                                                                  | N/A                                  |
| Quantitative variables       | 11      | Explain how quantitative variables were handled in the analyses. If applicable, describe which groupings were chosen and why                                                               | Yes (page 10)                        |
| Statistical methods          | 12      | (a) Describe all statistical methods, including those used to control for confounding                                                                                                      | Yes (page 10)                        |

1  
2 (b) Describe any methods used to examine subgroups and Yes  
3 interactions

---

4 (c) Explain how missing data were addressed

---

5 (d) *Cohort study*—If applicable, explain how loss to follow- N/A  
6 up was addressed

7  
8 *Case-control study*—If applicable, explain how matching of  
9 cases and controls was addressed

10 *Cross-sectional study*—If applicable, describe analytical  
11 methods taking account of sampling strategy

---

12 € Describe any sensitivity analyses  
13

14 Continued on next page  
15  
16  
17  
18  
19  
20  
21  
22  
23  
24  
25  
26  
27  
28  
29  
30  
31  
32  
33  
34  
35  
36  
37  
38  
39  
40  
41  
42  
43  
44  
45  
46  
47  
48  
49  
50  
51  
52  
53  
54  
55  
56  
57  
58  
59  
60

1  
2  
3  
4  
5  
6  
7  
8  
9  
10  
11  
12  
13  
14  
15  
16  
17  
18  
19  
20  
21  
22  
23  
24  
25  
26  
27  
28  
29  
30  
31  
32  
33  
34  
35  
36  
37  
38  
39  
40  
41  
42  
43  
44  
45  
46  
47  
48  
49  
50  
51  
52  
53  
54  
55  
56  
57  
58  
59  
60**Results**

|                  |     |                                                                                                                                                                                                              |                   |
|------------------|-----|--------------------------------------------------------------------------------------------------------------------------------------------------------------------------------------------------------------|-------------------|
| Participants     | 13* | (a) Report numbers of individuals at each stage of study—eg numbers potentially eligible, examined for eligibility, confirmed eligible, included in the study, completing follow-up, and analysed            | Yes (pages 17-18) |
|                  |     | (b) Give reasons for non-participation at each stage                                                                                                                                                         | N/A               |
|                  |     | (c) Consider use of a flow diagram                                                                                                                                                                           | N/A               |
| Descriptive data | 14* | (a) Give characteristics of study participants (eg demographic, clinical, social) and information on exposures and potential confounders                                                                     | Yes (pages 17-18) |
|                  |     | (b) Indicate number of participants with missing data for each variable of interest                                                                                                                          | Yes (table 1)     |
|                  |     | (c) <i>Cohort study</i> —Summarise follow-up time (eg, average and total amount)                                                                                                                             |                   |
| Outcome data     | 15* | <i>Cohort study</i> —Report numbers of outcome events or summary measures over time                                                                                                                          | N/A               |
|                  |     | <i>Case-control study</i> —Report numbers in each exposure category, or summary measures of exposure                                                                                                         | N/A               |
|                  |     | <i>Cross-sectional study</i> —Report numbers of outcome events or summary measures                                                                                                                           | Yes               |
| Main results     | 16  | (a) Give unadjusted estimates and, if applicable, confounder-adjusted estimates and their precision (eg, 95% confidence interval). Make clear which confounders were adjusted for and why they were included | N/A               |
|                  |     | (b) Report category boundaries when continuous variables were categorized                                                                                                                                    | Yes (pages 17-18) |
|                  |     | (c) If relevant, consider translating estimates of relative risk into absolute risk for a meaningful time period                                                                                             | N/A               |
| Other analyses   | 17  | Report other analyses done—eg analyses of subgroups and interactions, and sensitivity analyses                                                                                                               | N/A               |

**Discussion**

|                  |    |                                                                                                                                                                            |                  |
|------------------|----|----------------------------------------------------------------------------------------------------------------------------------------------------------------------------|------------------|
| Key results      | 18 | Summarise key results with reference to study objectives                                                                                                                   | Yes (Page 22)    |
| Limitations      | 19 | Discuss limitations of the study, taking into account sources of potential bias or imprecision. Discuss both direction and magnitude of any potential bias                 | Yes (page 20)    |
| Interpretation   | 20 | Give a cautious overall interpretation of results considering objectives, limitations, multiplicity of analyses, results from similar studies, and other relevant evidence | Yes (page 20-22) |
| Generalisability | 21 | Discuss the generalisability (external validity) of the study results                                                                                                      | Yes (page 22)    |

**Other information**

|         |    |                                                                                                                                                               |               |
|---------|----|---------------------------------------------------------------------------------------------------------------------------------------------------------------|---------------|
| Funding | 22 | Give the source of funding and the role of the funders for the present study and, if applicable, for the original study on which the present article is based | Yes (page 25) |
|---------|----|---------------------------------------------------------------------------------------------------------------------------------------------------------------|---------------|

\*Give information separately for cases and controls in case-control studies and, if applicable, for exposed and unexposed groups in cohort and cross-sectional studies.

**Note:** An Explanation and Elaboration article discusses each checklist item and gives methodological background and published examples of transparent reporting. The STROBE checklist is best used in conjunction with this article (freely

1  
2 available on the Web sites of PLoS Medicine at <http://www.plosmedicine.org/>, Annals of Internal Medicine at  
3 <http://www.annals.org/>, and Epidemiology at <http://www.epidem.com/>). Information on the STROBE Initiative is  
4 available at [www.strobe-statement.org](http://www.strobe-statement.org).  
5  
6  
7  
8  
9  
10  
11  
12  
13  
14  
15  
16  
17  
18  
19  
20  
21  
22  
23  
24  
25  
26  
27  
28  
29  
30  
31  
32  
33  
34  
35  
36  
37  
38  
39  
40  
41  
42  
43  
44  
45  
46  
47  
48  
49  
50  
51  
52  
53  
54  
55  
56  
57  
58  
59  
60

For peer review only

# BMJ Open

## Delays between the onset of symptoms and first rheumatology consultation in patients with rheumatoid arthritis in the UK: an observational study

|                                 |                                                                                                                                                                                                                                                                                                                                                                                                                                                                                                                                                                                                                                                                                                                                                                           |
|---------------------------------|---------------------------------------------------------------------------------------------------------------------------------------------------------------------------------------------------------------------------------------------------------------------------------------------------------------------------------------------------------------------------------------------------------------------------------------------------------------------------------------------------------------------------------------------------------------------------------------------------------------------------------------------------------------------------------------------------------------------------------------------------------------------------|
| Journal:                        | <i>BMJ Open</i>                                                                                                                                                                                                                                                                                                                                                                                                                                                                                                                                                                                                                                                                                                                                                           |
| Manuscript ID                   | bmjopen-2018-024361.R3                                                                                                                                                                                                                                                                                                                                                                                                                                                                                                                                                                                                                                                                                                                                                    |
| Article Type:                   | Research                                                                                                                                                                                                                                                                                                                                                                                                                                                                                                                                                                                                                                                                                                                                                                  |
| Date Submitted by the Author:   | 06-Dec-2018                                                                                                                                                                                                                                                                                                                                                                                                                                                                                                                                                                                                                                                                                                                                                               |
| Complete List of Authors:       | Stack, Rebecca; Nottingham Trent University , Division of Psychology Nightingale, Peter; Queen Elizabeth Hospital Birmingham, Wellcome Trust Clinical Research Facility<br>Jinks, Clare; Keele University, Arthritis Research UK Primary Care Centre Study Syndicate, DELAY<br>Shaw, Karen; University of Birmingham, Institute of Applied Health Research<br>Herron-Marx, Sandy; Independent Research Consultant<br>Horne, Rob; UCL, UCL School of Pharmacy<br>Deighton, Chris; Derby Teaching Hospitals NHS Foundation Trust<br>Kiely, Patrick ; St George's University Hospitals NHS Foundation Trust<br>Mallen, Christian; Keele University, Arthritis Research UK Primary Care Centre<br>Raza, Karim; University of Birmingham, Institute of Inflammation and Ageing |
| <b>Primary Subject Heading</b>: | Rheumatology                                                                                                                                                                                                                                                                                                                                                                                                                                                                                                                                                                                                                                                                                                                                                              |
| Secondary Subject Heading:      | Health services research, Rheumatology                                                                                                                                                                                                                                                                                                                                                                                                                                                                                                                                                                                                                                                                                                                                    |
| Keywords:                       | RHEUMATOLOGY, access to care, help seeking, health service research, rheumatoid arthritis                                                                                                                                                                                                                                                                                                                                                                                                                                                                                                                                                                                                                                                                                 |
|                                 |                                                                                                                                                                                                                                                                                                                                                                                                                                                                                                                                                                                                                                                                                                                                                                           |

SCHOLARONE™  
Manuscripts

1  
2  
3 **Title: Delays between the onset of symptoms and first rheumatology consultation in**  
4  
5 **patients with rheumatoid arthritis in the UK: an observational study**  
6  
7  
8  
9

10 **Authors**

11  
12 Rebecca J Stack<sup>1,2</sup>, Peter Nightingale<sup>3</sup>, Clare Jinks<sup>4</sup>, DELAY study syndicate, Karen Shaw<sup>5</sup>,  
13  
14 Sandy Herron-Marx<sup>6</sup>, Rob Horne<sup>7</sup>, Chris Deighton<sup>8</sup>, Patrick Kiely<sup>9</sup>, Christian D Mallen<sup>4</sup> and  
15  
16 Karim Raza<sup>1,10</sup>  
17  
18  
19  
20  
21  
22

23 **Department and Institutions**

- 24  
25 1. Institute of Inflammation and Ageing, University of Birmingham, UK.  
26  
27 2. Division of Psychology, Nottingham Trent University, Nottingham, UK  
28  
29 3. Wolfson Computer Laboratory, University Hospitals Birmingham NHS Foundation  
30  
31 Trust, Birmingham, UK.  
32  
33 4. Research Institute for Primary Care and Health Sciences, Keele University, UK.  
34  
35 5. Institute of Applied Health Research, University of Birmingham, UK  
36  
37 6. Independent Research Consultant, Brussels, Belgium.  
38  
39 7. School of Pharmacy, University of London, UK.  
40  
41 8. Department of Rheumatology, Derby Hospitals NHS Foundation Trust, Derby, UK.  
42  
43 9. Department of Rheumatology, St Georges University Hospital NHS Foundation Trust,  
44  
45 London, UK.  
46  
47 10. Department of Rheumatology, Sandwell and West Birmingham Hospitals NHS Trust,  
48  
49 Birmingham, UK.  
50  
51  
52  
53  
54  
55  
56  
57  
58  
59  
60

1  
2  
3 **Corresponding author**  
4

5  
6 Professor Karim Raza  
7

8 Rheumatology Research Group  
9

10 Institute of Inflammation and Ageing (IIA)  
11

12 University of Birmingham  
13

14 Queen Elizabeth Hospital, Birmingham, B15 2WB  
15

16 E mail : [k.raza@bham.ac.uk](mailto:k.raza@bham.ac.uk)  
17  
18  
19  
20  
21  
22

23 **Word Count** (excluding title page, abstract, references and tables): 2499  
24  
25  
26  
27  
28  
29

30 **Keywords**  
31

32 Rheumatoid arthritis; patient delay; Primary care delay; help-seeking; access to care;  
33  
34  
35  
36  
37  
38  
39  
40  
41  
42  
43  
44  
45  
46  
47  
48  
49  
50  
51  
52  
53  
54  
55  
56  
57  
58  
59  
60

### Strengths and limitations of this study.

A key strength of this study is that it surveyed a large sample of patients with new onset rheumatoid arthritis.

Participants were recruited from multiple NHS Trusts in the UK to identified delays in access to care.

Data on delay timepoints, demographic characteristics and consultation behaviour were gathered from multiple sources including patient self-report, healthcare professionals assessment and referral letters.

Limitations include the fact that data were collected at the point of diagnosis and information regarding key dates (in particular the onset of symptoms and presentation to primary care) were reliant on patient recall.

An additional limitation was that the interval between first consultation with a Rheumatologist and initiation of treatment was not measured.



## Abstract

Objective: To investigate delays from symptom onset to rheumatology assessment for patients with a new onset of rheumatoid arthritis (RA) or unclassified arthritis.

Methods: Newly presenting adults with either RA or unclassified arthritis were recruited from rheumatology clinics. Data on the length of time between symptom onset and first seeing a GP (patient delay), between first seeing a GP and being referred to a rheumatologist (general practitioner delay) and being seen by a rheumatologist following referral (hospital delay) were captured.

Results: 822 patients participated (563 female, mean age 55 years). The median time between symptom onset and seeing a rheumatologist was 27.2 weeks (IQR 14.1–66 weeks); only 20% of patients were seen within the first 3 months following symptom onset. The median patient delay was 5.4 weeks (IQR 1.4–26.3 weeks). Patients who purchased over the counter medications or used ice/heat packs took longer to seek help than those who did not. In addition, those with a palindromic or an insidious symptom onset delayed for longer than those with a non-palindromic or acute onset. The median general practitioner delay was 6.9 weeks (IQR 2.3–20.3 weeks). Patients made a mean of 4 GP visits before being referred. The median hospital delay was 4.7 weeks (IQR 2.9–7.5 weeks).

Conclusion: This study identified delays at all levels in the pathway towards assessment by a Rheumatologist. However, delays in primary care were particularly long. Patient delay was driven by the nature of symptom onset. Complex multi-faceted interventions to promote rapid help seeking and to facilitate prompt onward referral from primary care should be developed.

## Introduction:

Rheumatoid arthritis (RA) is a chronic inflammatory disease affecting approximately 1% of the population.<sup>1,2</sup> Rheumatoid arthritis is associated with significant morbidity in large part as a consequence of extra-articular co-morbidities associated with systemic inflammation. In the UK it has been estimated that RA costs the NHS around £560 million per year and that additional costs to the economy of sick leave and work-related disability total £1.8 billion per year.<sup>3</sup> The first three months following the onset of RA symptoms represents an important therapeutic window.<sup>4</sup> Treatment during this phase improves long-term clinical outcomes, increasing the proportion of patients whose disease enters remission, reducing RA related joint damage and reducing the eventual need for joint replacement surgery.<sup>5-10</sup> Therefore, it is vital that patients are seen by Rheumatologists rapidly following the onset of RA symptoms to allow the rapid introduction of disease modifying anti-rheumatic drug treatment. However, despite increased recognition of the benefits of early treatment there remains considerable delay between symptom onset and the initiation of therapy.<sup>11-13</sup> Indeed a report by the UK's National Audit Office (NAO) in 2009 estimated that only 10% of patients with RA were treated within three months of symptom onset. The NAO's modelling suggested significant financial benefits for the broader economy and quality of life benefits for the individual if the proportion of patients treated earlier was increased.<sup>3</sup>

The patient's pathway to care can be delayed for a number of reasons, including delays on the part of the patient in recognising the significance of the early symptoms of RA.<sup>14-16</sup> Recent

1  
2  
3 research has linked patients' perceptions of RA and coping styles to the length of time taken  
4 to seek help.<sup>17</sup> Before seeking medical help from a physician, patients may seek help from a  
5 range of services including complementary therapists, pharmacists and telephone and on-line  
6 services. However, the use of these services at the onset of inflammatory arthritis has not  
7 been fully explored. Primary healthcare professionals often find the early symptoms of RA  
8 difficult to distinguish from those of other rheumatic diseases, making timely and appropriate  
9 referrals to rheumatologists challenging.<sup>18;19</sup> There may thus be delays in healthcare  
10 professionals making a referral to a Rheumatologist and also in assessment at the secondary  
11 care level, contributing further to the delay in making a diagnosis and commencing  
12 appropriate therapy.

13  
14  
15  
16  
17  
18  
19  
20  
21  
22  
23  
24  
25  
26  
27  
28  
29  
30 Several studies conducted across a range of countries have shown long delays between the  
31 onset of symptoms and a patient's first consultation with a rheumatologist.<sup>20-23</sup> However,  
32 data related to lengths of time between the onset of inflammatory musculoskeletal  
33 symptoms and first seeing a GP, between first seeing a GP and being referred to a  
34 rheumatologist and being seen by a rheumatologist following referral were not available  
35 across multiple NHS Trusts in multiple regions of the UK at the time of this study.

## 36 37 38 39 40 41 42 43 44 45 46 47 **Aim**

48  
49 The aim of this study was to investigate the extents of delay in assessment of patients with  
50 RA and unclassified arthritis. Specifically the study assessed extents of delay at the level of  
51 the patient in seeking help from the general practitioner, the general practitioner in  
52 referring to a Rheumatologist and the Rheumatologist in assessing the patient following  
53 referral. The relationships between extents of delay and clinical and demographic variables  
54  
55  
56  
57  
58  
59  
60

1  
2  
3 were explored and data captured relating to sources of information, help and advice utilized  
4  
5 by patients prior to GP consultation.  
6  
7  
8  
9

## 10 **Methods**

11  
12 A questionnaire based survey of consecutively presenting patients with a new onset of RA or  
13  
14 unclassified inflammatory arthritis was undertaken in England and Scotland. Networks such  
15  
16 as the Early Rheumatoid Arthritis Network<sup>24</sup> and the National Institute for Health Research  
17  
18 Clinical Research Network<sup>25</sup> were used identify Rheumatology centres to participate in this  
19  
20 study. RJS also promoted the study during abstract presentations at British Society for  
21  
22 Rheumatology meetings.  
23  
24  
25  
26  
27  
28  
29

30 Data were collected from Rheumatology departments in 34 NHS Trusts. Rheumatology  
31  
32 departments were secondary care based, although one rheumatology department  
33  
34 (Sandwell and West Birmingham Hospitals) operated clinics in both hospital and community  
35  
36 settings. Eligible patients were recruited on their first or second visit to the rheumatology  
37  
38 department following a primary care referral (data were not collected on the numbers of  
39  
40 patients whose data were collected at their first visit or at their second visit). Rheumatologists  
41  
42 were asked to approach consecutively presenting patients who met the eligibility criteria.  
43  
44  
45  
46 Eligible patients were newly referred adults (aged  $\geq 18$  years) with clinically apparent  
47  
48 synovial swelling of one or more joints who had either a new onset of RA (according to 2010  
49  
50 ACR / EULAR criteria <sup>26</sup>) or unclassified arthritis (UA; defined as a failure to fulfil classification  
51  
52 criteria for another inflammatory rheumatic disease). Patients with UA were recruited, as in  
53  
54 many cases patients with UA at initial secondary care assessment progress to RA over  
55  
56  
57  
58  
59 time.<sup>27</sup>  
60

1  
2  
3  
4  
5  
6 Data were collected using two questionnaires (available from the corresponding author on  
7  
8 request). First, following consent, the recruiting healthcare professional, with the patient  
9  
10 present, completed a questionnaire that captured data on extents of delays between [1]  
11  
12 symptom onset and seeing a healthcare professional (from herein referred to as 'patient  
13  
14 delay', these data was gathered from the patient's account by the recruiting healthcare  
15  
16 professional), [2] seeing a general practitioner and being referred to a rheumatologist (from  
17  
18 herein referred to as 'general practitioner e delay', these data was gathered from the  
19  
20 patient's account by the recruiting healthcare professional), and [3] being referred to a  
21  
22 rheumatologist and seeing a rheumatologist (from herein referred to as 'hospital delay',  
23  
24 these data were gathered from referral letters and hospital notes). Data were also gathered  
25  
26 on [1] demographic variables including the patient's age, gender, education, employment  
27  
28 status and postcode; deprivation ranks were calculated from postcode data using  
29  
30 Geoconvert 2010 which produced an Index of Multiple Deprivation (IMD) score,<sup>28</sup> [2] clinical  
31  
32 variables including the mode of symptom onset (palindromic (defined as intermittent  
33  
34 symptoms) vs. non-palindromic (defined as persistent symptoms)), rapidity of symptom  
35  
36 onset (acute vs. insidious; an acute onset was typically viewed as an onset of symptoms  
37  
38 which came on rapidly over 24-48 hours), duration of morning stiffness, swollen and tender  
39  
40 joint counts, Disease Activity Score 28 (DAS28) and fulfilment of 2010 ACR/EULAR criteria for  
41  
42 classification of RA<sup>26</sup>.

43  
44  
45  
46  
47  
48  
49  
50  
51  
52  
53  
54 In addition, via a separate questionnaire that patients completed by themselves, patients  
55  
56 provided data on actions taken in relation to their symptoms prior to seeking help from  
57  
58 primary care . The variables captured were informed by previous qualitative research,  
59  
60

1  
2  
3 including patient interviews and interviews with healthcare professionals. In addition, we  
4  
5 had input from Patient Research Partners and the questions asked were validated and  
6  
7 assessed for reliability<sup>29</sup>.  
8  
9

### 10 11 12 **Patient and Public Involvement**

13  
14  
15 Patient and public involvement was an important element of this study. Patient  
16  
17 representatives from Sandwell and West Birmingham Hospitals NHS Trust were involved in  
18  
19 the study design, advised on the content of patient facing materials including participant  
20  
21 information sheets and consent forms and the content of questionnaires including  
22  
23 questions related to actions taken by patients prior to consulting their GPs. Patients were  
24  
25 members of the Project Management Group reviewing study recruitment and supporting  
26  
27 the Group in developing approaches to ensure that recruitment proceeded to time and  
28  
29 target  
30  
31  
32  
33  
34  
35  
36  
37

### 38 **Analysis**

39  
40  
41 To ensure that the data met parametric assumptions, the distribution and levels of  
42  
43 multicollinearity between variables were checked. Data on patient delays, general  
44  
45 practitioner delays and hospital delays were not normally distributed, therefore, log values  
46  
47 of these delay data were created to generate normally distributed variables.  
48  
49

50  
51  
52 For each of the outcomes patient delay, general practitioner delay and hospital delay a  
53  
54 general linear model was used with main effects and two-way interactions for the following  
55  
56 explanatory variables: gender, ethnicity, IMD score, age, education, employment status,  
57  
58 mode of onset, rapidity of onset, patient reported family history of RA and RA vs. UA. For  
59  
60

each outcome any two-way interactions which were not significant were removed in a backwards stepwise fashion, with the pairings with the highest p values being removed first. All main effects were retained, so that the final model for each outcome included all ten explanatory variables and any significant two-way interactions ( $p < 0.01$ ). All significant main effects and interactions are reported in the Results section.

## Results

### 1. Participant characteristics

Data were collected from 856 patients between 2011 and 2014. Patients were withdrawn from the study due to incomplete data (21 cases) and ineligibility (13 cases in whom there was no clinical synovitis reported at recruitment). Data were thus analysed from 822 patients of whom 68.5% were female with a mean age of 55 years. Characteristics of patients are presented in table 1.

**Table 1:** Demographic and disease related characteristics of patients. Data are presented as either percentage (number) or median (IQR) as appropriate. Tender joint count is out of 42 joints (10 PIP, 10 MCP, 2 wrist, 2 elbow, 2 shoulder, 2 hip, 2 knee, 2 ankle, 10 MTP). Swollen joint count is out of 40 joints (10 PIP, 10 MCP, 2 wrist, 2 elbow, 2 shoulder, 2 knee, 2 ankle, 10 MTP).

|                          |             |
|--------------------------|-------------|
| Female                   | 68.5% (563) |
| Age, years               | 57 (45-67)  |
| Diagnosis of RA          | 73% (603)   |
| Ethnicity: Black British | 6.0% (49)   |

|                                        |                   |
|----------------------------------------|-------------------|
| South Asian                            | 7.7% (63)         |
| White British                          | 84.9% (698)       |
| Other                                  | 1.5% (12)         |
| Self-reported family history of RA     | 34.9% (287)       |
| Palindromic onset                      | 42.8% (352)       |
| Acute onset                            | 35.9% (295)       |
| Duration of morning stiffness, minutes | 60 (10-120)       |
| DAS28                                  | 4.88 (3.98 -5.80) |
| HAQ                                    | 1.13 (0.50-1.73)  |
| Tender joint count                     | 9 (4-18)          |
| Swollen joint count                    | 5 (2-10)          |

## 2. Intervals between symptom onset and first rheumatology consultation

Overall the median time between symptom onset and seeing a rheumatologist was 27.2 weeks (IQR 14.1 – 66 weeks); only 20% of patients were seen within the first 3 months following symptom onset. The median patient delay was 5.4 weeks (IQR 1.4-26.3 weeks). The median general practitioner delay was 6.9 weeks (IQR 2.3–20.3 weeks) with patients making a mean of 4 GP visits before being referred. The median hospital delay was 4.7 weeks (IQR 2.9–7.5 weeks).



1  
2  
3 *Palindromic onset is defined as intermittent symptoms, while non-palindromic is defined as persistent*  
4 *symptoms. Acute onset defined as symptoms which came on rapidly over 24-48 hours, while insidious*  
5 *onset is defined as symptoms which developed slowly over an extended period of time. Patients*  
6  
7  
8  
9  
10 with a palindromic symptom onset had a significantly longer patient delay than those with a  
11  
12 non-palindromic onset (9.3 weeks (IQR 2-43 weeks) vs 4.3 weeks (IQR 1-17 weeks);  $p < 0.001$ ,  
13  
14 t-test). Furthermore, those with an acute symptom onset had significantly shorter patient  
15  
16 delays than those with an insidious symptoms onset (2.4 weeks (IQR 1 - 6.6 weeks) vs 11.1  
17  
18 weeks (IQR 4-44 weeks;  $p < 0.001$ , t-test).  
19  
20  
21  
22  
23  
24  
25

#### 26 *Resources used before seeking help from primary care*

27  
28  
29 Patients reported taking a range of actions in relation to their symptoms before seeking help  
30  
31 from their GP and in some cases these actions were associated with longer delays in GP  
32  
33 consultation (see table 2). Most often patients reported purchasing tablets from 'the  
34  
35 chemist', although only a small proportion actually reported speaking to a pharmacist.  
36  
37  
38 Other actions reported by patients included applying heat or cold packs to joints or buying  
39  
40 joint supports.  
41  
42  
43  
44  
45  
46  
47

48 **Table 2.** *Actions taken by patients with inflammatory arthritis before seeking help from their*  
49 *GP with comparison made for patient delay between those who did and did not undertake*  
50 *this action using independent t-tests; \* P value for comparison of those who did and did not*  
51 *undertake this action.*  
52  
53  
54  
55  
56  
57  
58  
59  
60

| Actions taken before seeking help from GP       | % (number) of participants undertaking this action | Median (IQR) patient delay in weeks for those undertaking this action | Median (IQR) patient delay in weeks for those not undertaking this action | P value  |
|-------------------------------------------------|----------------------------------------------------|-----------------------------------------------------------------------|---------------------------------------------------------------------------|----------|
| Bought tablets from the chemist                 | 51.1%<br>(273 out of 534)                          | 6.9 (2-30.7)                                                          | 4.7 (1.4-23)                                                              | p=0.036  |
| Used an ice or heat pack on joint               | 47.8%<br>(254 out of 531)                          | 7.6 (2-30.3)                                                          | 4.9 (2-26.1)                                                              | p=0.045  |
| Took baths                                      | 47.4%<br>(251 out of 529)                          | 6.3 (2-30.4)                                                          | 5.6 (2-26.1)                                                              | p=0.473  |
| Bought joint supports (splints, tubi-grips etc) | 37.4%<br>(198 out of 529)                          | 4.4 (2.1-18.6)                                                        | 5.1 (2-26.9)                                                              | p=0.362  |
| Used alternative therapies                      | 25.2%<br>(134 out of 531)                          | 8.3 (2-42.1)                                                          | 5.3 (2-26.3)                                                              | p=0.020  |
| Bought products from a health shop              | 19.0%<br>(101 out of 532)                          | 5.9 (2-36.3)                                                          | 5.9 (2-26)                                                                | p=0.182  |
| Modified diet                                   | 14.4%<br>(76 out of 529)                           | 6 (2.1-35.3)                                                          | 6.1(2-26.3)                                                               | p= 0.183 |

|                                          |                         |                |              |         |
|------------------------------------------|-------------------------|----------------|--------------|---------|
| Used prayer or sought spiritual guidance | 8.4%<br>(45 out of 534) | 4.4 (2.1-18.6) | 6.3 (2-26.9) | p=0.941 |
| Spoke to a pharmacist                    | 7.9%<br>(41 out of 521) | 5.9 (2-38.1)   | 5.9 (2-26.3) | p=0.544 |

Thirty-seven percent of patients reported looking on the internet (for example visiting the NHS direct website, BUPA website, Arthritis Research UK website and searching for information using search engines such as Google). Patients also reported seeking support via a telephone helpline; 5.7% described calling the NHS direct helpline or another telephone health advice service. 3.7% sought help in the workplace (e.g. from an occupational nurse), 2% of patients went directly to the Accident and Emergency Department and 1% attended an NHS walk-in centre.

### **Multivariate analysis: Patient delay**

The interaction model showed main effects for mode of onset (palindromic vs. non-palindromic;  $F=26.65$ ,  $P<0.01$ ) and rapidity of onset (acute vs. insidious;  $F=65.36$ ,  $P<0.01$ ). An interaction was found between palindromic onset and gender ( $F=45.658$ ,  $P<0.01$ ); men with a palindromic onset waited significantly longer before seeking help.

### **Multivariate analysis: General practitioner delay**

A main effect was found for ethnicity ( $F=6.26$ ,  $P<0.01$ ). Significant differences in general practitioner delay were found between White British and South Asian patients (6.2 weeks (IQR 2-18.6) vs 22 weeks (IQR 6.5-39.8);  $P<0.001$ ) and between White British and Black British patients (6.2 weeks (IQR 2-18.6) vs 11.1 weeks (IQR 4.3-21.7);  $P<0.001$ ). No significant difference was found between South Asian and Black British patients ( $P=1.000$ ).

A main effect was also found for family history ( $F=5.89$ ,  $P<0.01$ ); the median general practitioner delay for those with a self-reported family history of RA was 9 weeks (IQR 2.4-25.7), while general practitioner delay for those with no family history was 6.3 weeks (IQR 2.3-19). Interactions at a statistically significant level ( $<0.01$ ) were not found.

### **Multivariate analysis: Hospital delay**

The original model included main effects and two-way interactions for the following explanatory variables: gender, ethnicity, IMD score, age, education, employment status, mode of onset, rapidity of onset, family onset and RA vs. UA. None of the main effects or interactions (when removed backwards) were significant in predicting the delay between referral and being seen in secondary care.

## Discussion

International guidelines recommend that the treatment of RA should begin as soon as possible after the onset of symptoms, ideally aiming to capture patients within the first 3 months following symptom onset. However, this large UK study of delays in access to care for RA patients found that the median patient delay in seeking help at the onset of symptoms was 5.4 weeks, while the median delay between seeing a healthcare professional and being referred was 6.9 weeks. Our study highlights that only 20% of patients were seen within the first 3 months of symptom onset. This appears to be lower than the rate reported in other European countries for example a recent study in Austria reported that 38% of patients were seen within the first 3 months<sup>30</sup>. The present study also found an average delay of 4.7 weeks from referral until the patient was seen by a rheumatologist, similar to figures reported in the NAO report<sup>3</sup>. Unlike our previous study conducted at a single centre in the UK where patient delay accounted for the largest element of delay,<sup>13</sup> we found that GP delay was the largest contributor to overall delay; patient delay was less than we had previously reported in our single centre study.

This research highlights that delays in primary care are long, and a major contributor to overall delays between symptom onset and the first rheumatology visit. General practitioners are faced with a number of barriers to identifying patients with newly presenting RA including the often non-specific nature of symptoms at the earliest stages of RA.<sup>18</sup> Research is underway to define symptom complexes most predictive of RA development in patients with newly presenting musculoskeletal symptoms. For example, a questionnaire has been developed and validated to capture such symptoms in patients

1  
2  
3 presenting with joint symptoms which by history are suggestive of an underlying  
4  
5 inflammatory cause<sup>31</sup> and data are currently being collected from such patients in secondary  
6  
7 care based longitudinal observational cohort studies to identify symptoms that may predict  
8  
9 RA development. Furthermore an assessment of primary care databases has identified a  
10  
11 range of symptoms including hand related joint symptoms, morning stiffness and carpal  
12  
13 tunnel syndrome type symptoms as being ones with which patients frequently present to  
14  
15 the GP prior to the point at which the GP refers the patient to a Rheumatologist or records a  
16  
17 diagnosis of RA <sup>32</sup> It is likely that a combination of education, and evidence based referral  
18  
19 algorithms, will be needed to ensure that suspected cases are referred early. For example,  
20  
21 in Fife, Scotland GPs did not have access to rheumatoid factor testing during the course of  
22  
23 our study, and used guidelines with pictorial representations to help identify early synovitis  
24  
25 (personal communication Dr Helen Harris). Fife was a participating centre in this study, and  
26  
27 was found to have the lowest GP referral time of all centres surveyed. Furthermore,  
28  
29 facilitating access to secondary care, for example through the establishment of rapid  
30  
31 assessment clinics whose main aim is to identify whether the patient does or does not have  
32  
33 synovitis have been shown to significantly reduce delays in the assessment of patients.<sup>33</sup> A  
34  
35 limitation of our research is that the study was not able to assess regional differences across  
36  
37 NHS Trusts. A study comparing delays and referral patterns between hospitals with local  
38  
39 policies and practices which may influence the time between onset and first consultation  
40  
41 would be useful and an international study would be particularly helpful. In addition, this  
42  
43 study did not examine the distances between patients' homes and their local GP surgeries,  
44  
45 and hospital and so we were unable to assess whether physical distance between the  
46  
47 patient's home and the GP surgery or hospital influenced delay.  
48  
49  
50  
51  
52  
53  
54  
55  
56  
57  
58  
59  
60

1  
2  
3 A number of factors were found to influence GP delay including ethnicity. Studies in the field  
4  
5 of oncology have also found that people from ethnic minority backgrounds face longer GP  
6  
7 delays.<sup>34;35</sup> In the context of RA it is possible that the early symptomatology of patients from  
8  
9 ethnic minority backgrounds is different from, and less typical of RA than that of, patients of  
10  
11 white British background, thus making recognition more challenging for GPs. Data certainly  
12  
13 exist that the clinical phenotype of established RA differs in patients of South Asian origin  
14  
15 compared with patients of White British origin,<sup>36</sup> though data relating the clinical  
16  
17 presentations of RA in these groups are lacking. Furthermore, it is unclear why a self-  
18  
19 reported family history of RA would be associated with longer delays although it is  
20  
21 important to recognise that GPs may not have elicited this information from the patient.<sup>37</sup>  
22  
23 Qualitative approaches may be helpful to address some of these issues in the future.  
24  
25  
26  
27  
28  
29  
30  
31

32  
33 Previous qualitative studies and a meta-synthesis have identified barriers to help seeking at  
34  
35 the onset of RA.<sup>37-43</sup> The present study identifies that before seeking formal medical  
36  
37 attention, people experiencing the early symptoms of RA seek information and help from a  
38  
39 number of alternative sources and often self-medicate. We identified that buying tablets  
40  
41 from a pharmacy, and using heat or ice on joints was significantly associated with longer  
42  
43 patient delays. This finding highlights that some self-management behaviours, particularly  
44  
45 those linked to accessing pharmacy services can negatively impact on the time it takes to  
46  
47 seek help; this needs further exploration. Factors previously suggested to be associated  
48  
49 with delays in GP consultation included an insidious onset of mild symptoms and a lack of  
50  
51 knowledge about RA, personal susceptibility to RA and the availability of treatments to slow  
52  
53 disease progression. In our national sample 64.1% of people describe an insidious onset of  
54  
55 RA, and 42.8% describe a palindromic onset of RA. Therefore, majority large proportion of  
56  
57  
58  
59  
60

1  
2  
3 patients surveyed experienced a slow and / or intermittent onset of their inflammatory joint  
4  
5 symptoms. Our quantitative data are thus consistent with results from qualitative studies,  
6  
7 demonstrating that the mode and rapidity of onset of symptoms is significantly associated  
8  
9 with patient delays.  
10  
11

12  
13 This study has a number of limitations. Firstly, the interval between first consultation with a  
14  
15 Rheumatologist and initiation of disease modifying anti-rheumatic drug (DMARD) treatment  
16  
17 was not measured. Any additional delay in commencing DMARD treatment will negatively  
18  
19 impact the patient and variables associated with delays at this level should be assessed in  
20  
21 future studies. Secondly, during the course of this study a number of guidelines related to  
22  
23 RA management were published which may have influenced practice, and patterns of  
24  
25 referral. We were not able to explore the relationships between the availability / local  
26  
27 adoption of guidelines and delays in the assessment of patients. Future investigation should  
28  
29 assess the impact of policy changes on patterns of help-seeking, referral and assessment.  
30  
31  
32 Thirdly, the rheumatology centres participating in this study were self-selecting, therefore,  
33  
34 there may be biases in the characteristics of the rheumatology centres which participated in  
35  
36 this study. For example, the participating rheumatology units may have had a particular  
37  
38 interest in early arthritis. Only a study which recruited consecutive patients from all  
39  
40 rheumatology units across the UK would be able to provide a truly national picture.  
41  
42  
43 Fourthly, whilst we were able to document the length of delay at a primary care level there  
44  
45 were important variables which may have influenced this delay which we did not record and  
46  
47 so were unable to explore. For example it would have been helpful have access to results  
48  
49 tests performed in primary care to assess whether levels of inflammatory markers or RA  
50  
51 related autoantibodies measured in primary care influenced the rapidity of referral from  
52  
53 primary care. Indeed a recent quantitative survey of GPs' anticipated actions in primary care  
54  
55  
56  
57  
58  
59  
60



1  
2  
3 when dealing with patients with suspected RA suggest that results of these tests may  
4 influence GP behaviours<sup>44</sup>. Future research should address this. Similarly, a number of  
5 secondary care related variables may have influenced the extent of secondary care delay  
6 including the number of rheumatologists at each Trust, whether a dedicated early arthritis  
7 clinic was in place and approaches taken to the triage of referrals. Data relating to these  
8 variables were not collected though future work addressing issues of delay should address  
9 these important issues. Fifthly, data relating to the dates of onset of symptoms and initial  
10 GP consultation were gathered from patients' histories, and therefore relied on patient  
11 recollection with a possible associated error. However, a previous study addressing delays in  
12 the assessment of patients with RA, compared patient accounts of their journeys to first  
13 rheumatology consultation against medical records and highlighted the accuracy of patient  
14 recollection in relation to dates found to be documented in primary care records<sup>45</sup>. This, to  
15 some extent, validates our approach of using patient memory to define the dates of  
16 symptom onset and initial GP presentation. An alternative approach would be a  
17 longitudinal observational study in the general population to track the development of  
18 symptoms and the relationship between that and GP consultation, GP referral and  
19 secondary care assessment. A challenge with this approach is the low incidence of RA and  
20 thus the requirement for a very large sample size. One could potentially enrich the  
21 population for RA risk by, for example, following individuals who are at increased risk of RA  
22 (e.g. the first degree relatives of patients with RA). However, one of the challenges with this  
23 strategy is that simply being involved in such a study may influence subsequent patient and  
24 GP behaviour.

1  
2  
3 Whilst delays in primary care are the largest contributor to overall delay, patient delay and  
4 hospital delay represent important components. This study found that the nature of  
5  
6 symptoms onset influenced how quickly patients with RA sought help, suggesting that those  
7  
8 with an acute onset of persistent symptoms seek help faster than those with insidious and  
9  
10 palindromic onsets. Interventions to encourage rapid help seeking should consider  
11  
12 highlighting the frequently insidious onset of RA to members of the public stressing that  
13  
14 help should be sought even when symptoms are mild. However, even those with a rapid  
15  
16 onset of persistent symptoms often delayed for prolonged periods before seeking help. We  
17  
18 have previously shown that members of the public view musculoskeletal symptoms, even  
19  
20 those with clear inflammatory features, as less worrisome and less requiring rapid  
21  
22 assessment as compared with symptoms of other common diseases such as ischaemic type  
23  
24 chest pain or bowel disturbance with associated rectal blood loss<sup>46</sup>. Enhanced public  
25  
26 education to highlight the significance of inflammatory type musculoskeletal symptoms is  
27  
28 thus likely to be needed. Interventions at multiple levels, including at the levels of the  
29  
30 public, the services which members of the public consult after the onset of symptoms (e.g.  
31  
32 pharmacies), primary care and secondary care will be needed to reduce overall delays in  
33  
34 access to appropriate specialists.  
35  
36  
37  
38  
39  
40  
41  
42  
43  
44  
45  
46  
47  
48  
49  
50  
51  
52  
53  
54  
55  
56  
57  
58  
59  
60

## Competing interests

No competing Interest:

## Contributorship

RJS, CJ, SHM, CDM, KS, RH, CD, PK and KR made substantial contributions to the conception or design of the work. The acquisition of data was undertaken by RJS, KR, PK and CD. RJS, CJ and SHM facilitated patient and public involvement in the design, delivery and interpretation of this study. The analysis and interpretation of data were undertaken by RJS, PN and KR. RJS, PN, CJ, SHM, CDM, KS, RH, CD, PK and KR were involved in drafting the work and revising it critically for important intellectual content. RJS, CJ, SHM, CDM, KS, RH, CD, PK and KR gave final approval of the version published. All authors agree to be accountable for all aspects of the work in ensuring that questions related to the accuracy or integrity of any part of the work are appropriately investigated and resolved.

## Acknowledgements

We would like to thank the staff at the rheumatology departments who collected data for this study. We would also like to thank patient research partners at Sandwell and West Birmingham Hospitals NHS Trust for their help and support with this study.

## Funding information

This article presents independent research funded in part by the National Institute for Health Research (NIHR) under the Research for Patient Benefit Programme (funder's reference PB-PG-1208-18114). CDM is funded by the National Institute for Health Research (NIHR) Collaborations for Leadership in Applied Health Research and Care West Midlands, the NIHR School for Primary Care Research and a NIHR Research Professorship in General Practice (NIHR-RP-2014-04-026). CJ is part-funded by the NIHR Collaborations for Leadership in Applied Health Research and Care West Midlands. RH is part-funded by North Thames CLAHRC and his contribution was also supported by an NIHR Senior Investigator Award. KS is funded by the NIHR CLAHRC West Midlands initiative. The views expressed in this publication are those of the authors and not necessarily those of the NHS, the National Institute for Health Research or the Department of Health and Social Care.

**Ethical approval information** Ethical approval was obtained from South Birmingham Research Ethics Committee (reference no. 10/H1207/98) and all participants gave written

1  
2  
3 informed consent. Data was stored in a secure location and protected by multiple security  
4 systems.  
5  
6  
7

### 8 **Data sharing statement**

9  
10 Data are available upon request from the corresponding author.  
11  
12  
13

### 14 **Exclusive Licence**

15  
16 I, the Submitting Author has the right to grant and does grant on behalf of all authors of the Work  
17 (as defined in the below author licence), an exclusive licence and/or a non-exclusive licence for  
18 contributions from authors who are: i) UK Crown employees; ii) where BMJ has agreed a CC-BY  
19 licence shall apply, and/or iii) in accordance with the terms applicable for US Federal  
20 Government officers or employees acting as part of their official duties; on a worldwide,  
21 perpetual, irrevocable, royalty-free basis to BMJ Publishing Group Ltd ("BMJ") its licensees and  
22 where the relevant Journal is co-owned by BMJ to the co-owners of the Journal, to publish the  
23 Work in BMJ Open and any other BMJ products and to exploit all rights, as set out in our [licence](#).  
24  
25  
26  
27  
28

29  
30 The Submitting Author accepts and understands that any supply made under these terms is  
31 made by BMJ to the Submitting Author unless you are acting as an employee on behalf of your  
32 employer or a postgraduate student of an affiliated institution which is paying any applicable  
33 article publishing charge ("APC") for Open Access articles. Where the Submitting Author wishes  
34 to make the Work available on an Open Access basis (and intends to pay the relevant APC), the  
35 terms of reuse of such Open Access shall be governed by a Creative Commons licence – details  
36 of these licences and which [Creative Commons](#) licence will apply to this Work are set out in our  
37 licence referred to above.  
38  
39  
40  
41  
42  
43

### 44 **Non-author contributors - Delay study syndicate**

45  
46  
47 Sandwell and West Birmingham Hospitals NHS Trust: Biruk Asfaw, Sabrina Kapoor, Kanta  
48 Kumar, Adam Slater & Christopher Buckley

49  
50 Derby Teaching Hospitals NHS Foundation Trust: Chris Deighton & Alison Booth

51  
52 Nottingham University Hospitals NHS Trust: Marie-Josophe Pradere, Ira Pande & Ian  
53  
54 Gaywood

55  
56 St George's University Hospitals NHS Trust: Francesca Leone & Patrick Keily

57  
58 Lancaster Teaching Hospitals NHS Foundation Trust: Bronwen Evans & Marwan Bukhari

59  
60 Poole Hospitals NHS Foundation Trust: Julia Taylor, Helena Knowles, & Sarah Westlake

1  
2  
3 University Hospitals Coventry and Warwickshire NHS Trust: Tanya Potter  
4  
5 Sherwood Forest Hospitals NHS Foundation Trust: Debbie Wilson, Jayne Smith & David  
6  
7 Walsh  
8  
9 King's College Hospitals NHS Foundation Trust: Nyarko Ahwireng, Audu Aderonke & David  
10  
11 Scott  
12  
13 Guy's and St Thomas NHS Foundation Trust: Louise Nel, Naomi Hare & Andrew Cope  
14  
15 North Bristol NHS Trust: Julie Taylor, Wendy Wilmott & Paul Creamer  
16  
17 West Hertfordshire Hospitals NHS Trust: Lynn Currie, Adam Young & Karen Markwell  
18  
19 Lewisham and Greenwich NHS Trust: Louise Pollard & Debbie Johnson  
20  
21 Royal Surrey Country NHS Foundation Trust: Stephanie Allen & Raad Makadsi  
22  
23 Hampshire Hospitals NHS Foundations Trust: Peter Prouse & Janet Cushnaghan  
24  
25 University Hospitals of Leicester NHS Trust: Jessy Sabu & Moorthy Arumugam  
26  
27 County Durham and Darlington NHS Foundation Trust: Matt Bridges & Pam Race  
28  
29 Weston Area Health NHS Trust: Dawn Symonds & Matt Bridges  
30  
31 University Hospitals Birmingham NHS Foundation Trust: Jackie Cobb, Andrew Filer, Simon  
32  
33 Bowman & Paresh Jobanputra  
34  
35 Royal Wolverhampton Hospital NHS Trust (at the time of recruitment the hospital from  
36  
37 which patients were recruited was within the Mid Staffordshire NHS Foundation Trust) :  
38  
39 Julie Edwards & Tom Sheeran  
40  
41 East Kent Hospitals University NHS Foundation Trust: Caroline Crowley & Imad Jassim  
42  
43 University Hospitals of the North Midlands NHS Trust: Julie Gray & Jon Packham  
44  
45 NHS Fife: Paul Allcoat & Helen Harris  
46  
47 Yeovil District Hospital NHS Foundation Trust: Rebecca Rowland & Sally Knights  
48  
49 Northumbria Healthcare NHS Foundation Trust AND The Newcastle Upon Tyne Hospitals  
50  
51 NHS Foundation Trust: Peta Heslop, Sandra Robinson, David Walker, Heather Russell &  
52  
53 Sheryl Mitchell  
54  
55 Chesterfield Royal Hospital NHS Foundation Trust: Heather Cripps & Kevin Fairburn  
56  
57 Lancashire Teaching Hospitals NHS Foundation Trust AND East Lancashire Hospital NHS  
58  
59 Trust: Sue Cotterell, Gillian Welch, Ayesha Madan & Lee Suan Teh  
60  
61 Cambridge University Hospitals NHS Foundation Trust: Lucy Winstanley & Shweta Bhagat  
62  
63 The Dudley Group NHS Foundation Trust: Lucy Kadiki, Chitra Ramful & Ravinder Sandhu  
64  
65 Royal Cornwall Hospitals NHS Trust: Amanda Datson, & Anthony Woolf  
66

1  
2  
3  
4  
5  
6  
7  
8  
9  
10  
11  
12  
13  
14  
15  
16  
17  
18  
19  
20  
21  
22  
23  
24  
25  
26  
27  
28  
29  
30  
31  
32  
33  
34  
35  
36  
37  
38  
39  
40  
41  
42  
43  
44  
45  
46  
47  
48  
49  
50  
51  
52  
53  
54  
55  
56  
57  
58  
59  
60

For peer review only

## Reference List

- 1  
2  
3  
4  
5  
6  
7  
8  
9  
10  
11  
12  
13  
14  
15  
16  
17  
18  
19  
20  
21  
22  
23  
24  
25  
26  
27  
28  
29  
30  
31  
32  
33  
34  
35  
36  
37  
38  
39  
40  
41  
42  
43  
44  
45  
46  
47  
48  
49  
50  
51  
52  
53  
54  
55  
56  
57  
58  
59  
60  

(1) Humphreys JH, Verstappen SM, Hyrich KL, Chipping JR, Marshall T, Symmons DP. The incidence of rheumatoid arthritis in the UK: comparisons using the 2010 ACR/EULAR classification criteria and the 1987 ACR classification criteria. Results from the Norfolk Arthritis Register. *Ann Rheum Dis* 2012; 72(8):1315-1320.

(2) Symmons D, Turner G, Webb R, Asten P, Barrett E, Lunt M et al. The prevalence of rheumatoid arthritis in the United Kingdom: new estimates for a new century. *Rheumatology (Oxford)* 2002; 41(7):793-800.

(3) National Audit Office. Services for people with rheumatoid arthritis. National Audit Office . 2009. London, The Stationery Office. 24-1-2013.

(4) van Nies JA, Tsonaka R, Gaujoux-Viala C, Fautrel B, van der Helm-van Mil AH. Evaluating relationships between symptom duration and persistence of rheumatoid arthritis: does a window of opportunity exist? Results on the Leiden Early Arthritis Clinic and ESPOIR cohorts. *Ann Rheum Dis* 2015; 74(5):806-812.

(5) Feldman DE, Bernatsky S, Houde M, Beauchamp ME, Abrahamowicz M. Early consultation with a rheumatologist for RA: does it reduce subsequent use of orthopaedic surgery? *Rheumatology (Oxford)* 2013; 52(3):452-459.

(6) Nell VP, Machold KP, Eberl G, Stamm TA, Uffmann M, Smolen JS. Benefit of very early referral and very early therapy with disease-modifying anti-rheumatic drugs in patients with early rheumatoid arthritis. *Rheumatology (Oxford)* 2004; 43(7):906-914.

(7) Raza K, Buckley CE, Salmon M, Buckley CD. Treating very early rheumatoid arthritis. *Best Pract Res Clin Rheumatol* 2006; 20(5):849-863.

(8) Raza K, Filer A. The therapeutic window of opportunity in rheumatoid arthritis: does it ever close? *Ann Rheum Dis* 2015; 74(5):793-794.

(9) Scott DL, Hunter J, Deighton C, Scott DG, Isenberg D. Treatment of rheumatoid arthritis is good medicine. *BMJ* 2011; 343:d6962.

(10) van der Linden MP, le Cessie S, Raza K, van der Woude D, Knevel R, Huizinga TW et al. Long-term impact of delay in assessment of patients with early arthritis. *Arthritis Rheum* 2010; 62(12):3537-3546.

(11) Feldman DE, Bernatsky S, Haggerty J, Leffondre K, Tousignant P, Roy Y et al. Delay in consultation with specialists for persons with suspected new-onset rheumatoid arthritis: a population-based study. *Arthritis Rheum* 2007; 57(8):1419-1425.

(12) Kiely P, Williams R, Walsh D, Young A. Contemporary patterns of care and disease activity outcome in early rheumatoid arthritis: the ERAN cohort. *Rheumatology (Oxford)* 2009; 48(1):57-60.

(13) Kumar K, Daley E, Carruthers DM, Situnayake D, Gordon C, Grindulis K et al. Delay in presentation to primary care physicians is the main reason why patients with rheumatoid arthritis are seen late by rheumatologists. *Rheumatology (Oxford)* 2007; 46(9):1438-1440.

- 1  
2  
3 (14) Stack RJ, Simons G, Kumar K, Mallen CD, Raza K. Patient delays in seeking help at the onset  
4 of rheumatoid arthritis: the problem, its causes and potential solutions. *Aging Health* 2013;  
5 9(4):425-435.  
6  
7 (15) Oliver S, Bosworth A, Airoldi M, Bunyan H, Callum A, Dixon J et al. Exploring the healthcare  
8 journey of patients with rheumatoid arthritis: a mapping project - implications for practice.  
9 *Musculoskeletal Care* 2008; 6(4):247-266.  
10  
11 (16) Villeneuve E, Nam JL, Bell MJ, Deighton CM, Felson DT, Hazes JM et al. A systematic  
12 literature review of strategies promoting early referral and reducing delays in the diagnosis  
13 and management of inflammatory arthritis. *Ann Rheum Dis* 2012; 27(1):13-22.  
14  
15 (17) Van der Elst K, De CD, Vecoven E, Arat S, Meyfroidt S, Joly J et al. Are illness perception and  
16 coping style associated with the delay between symptom onset and the first general  
17 practitioner consultation in early rheumatoid arthritis management? An exploratory study  
18 within the CareRA trial. *Scand J Rheumatol* 2015;1-8.  
19  
20 (18) Stack RJ, Llewellyn Z, Deighton C, Kiely P, Mallen CD, Raza K. General practitioners'  
21 perspectives on campaigns to promote rapid help-seeking behaviour at the onset of  
22 rheumatoid arthritis. *Scand J Prim Health Care* 2014; 32(1):37-43.  
23  
24 (19) Stack RJ, Shani M, Mallen CD, Raza K. Symptom complexes at the earliest phases of  
25 rheumatoid arthritis: a synthesis of the qualitative literature. *Arthritis Care Res* 2013;  
26 65(12):1916-1926.  
27  
28 (20) De Cock D, Meyfroidt S, Joly J, Van der Elst K, Westhovens R, Verschueren P. A detailed  
29 analysis of treatment delay from the onset of symptoms in early rheumatoid arthritis  
30 patients. *Scand J Rheumatol* 2014; 43(1):1-8  
31  
32 (21) van Nies JA, Brouwer E, de Rooy DP, van Gaalen FA, Huizinga TW, Posthumus MD et al.  
33 Reasons for medical help-seeking behaviour of patients with recent-onset arthralgia. *Ann*  
34 *Rheum Dis* 2013; 72(8):1302-1307.  
35  
36 (22) Zafar S, Badsha H, Mofti A, Delosantos A, Altares J, Matudio G et al. Efforts to increase public  
37 awareness may result in more timely diagnosis of rheumatoid arthritis. *J Clin Rheumatol*  
38 2012; 18(6):279-282.  
39  
40 (23) Nanji JA, Choi M, Ferrari R, Lyddell C, Russell AS. Time to consultation and disease-modifying  
41 antirheumatic drug treatment of patients with rheumatoid arthritis--northern Alberta  
42 perspective. *J Rheumatol* 2012; 39(4):707-711.  
43  
44 (24) Garwood W. The Early Rheumatoid Arthritis Network (ERAN). *Musculoskeletal care*. 2004  
45 Nov;2(4):240-4.  
46  
47 (25) The National Institute for Health Research Clinical Research Network.  
48 <https://www.nihr.ac.uk/about-us/how-we-are-managed/managing-centres/crn/> (accessed  
49 16<sup>th</sup> August 2018)  
50  
51 (26) Aletaha D, Neogi T, Silman AJ, Funovits J, Felson DT, Bingham CO, III et al. 2010 rheumatoid  
52 arthritis classification criteria: an American College of Rheumatology/European League  
53 Against Rheumatism collaborative initiative. *Ann Rheum Dis* 2010; 69(9):1580-1588.  
54  
55  
56  
57  
58  
59  
60



- 1  
2  
3 (27) van der Helm-van Mil AH, Detert J, le Cessie S, Filer A, Bastian H, Burmester GR et al.  
4 Validation of a prediction rule for disease outcome in patients with recent-onset  
5 undifferentiated arthritis: moving toward individualized treatment decision-making. *Arthritis*  
6 *Rheum* 2008; 58(8):2241-2247.  
7  
8 (28) Midas. GeoConvert. <http://geoconvert.mimas.ac.uk>. 2010.  
9  
10  
11 (29) Stack RJ, Mallen CD, Deighton C, Kiely P, Shaw KL, Booth A et al. The development and initial  
12 validation of a questionnaire to measure help-seeking behaviour in patients with new onset  
13 rheumatoid arthritis. *Health Expect* 2014; Jun(3):1-10.  
14  
15 (30) Puchner R, Janetschko R, Kaiser W, Linkesch M, Steininger M, Termetsberger R et al. Efficacy  
16 and Outcome of Rapid Access Rheumatology Consultation: An Office-based Pilot Cohort  
17 Study. *Journal of Rheumatology* 2016; 43(6):1130-1135.  
18  
19 (31) van Beers-Tas MH, ter Wee MM, van Tuyl LH, Maat B, Hoogland W, Hensvold AH, Catrina AI,  
20 Mosor E, Stamm TA, Finckh A, Courvoisier DS. Initial validation and results of the Symptoms  
21 in Persons At Risk of Rheumatoid Arthritis (SPARRA) questionnaire: a EULAR project. *RMD*  
22 open. 2018 May 1;4(1):e000641.  
23  
24 (32) Muller S, Hider S, Machin A, Stack R, Hayward RA, Raza K, Mallen C. Searching for a  
25 prodrome for rheumatoid arthritis in the primary care record: A case-control study in the  
26 clinical practice research datalink. In Seminars in arthritis and rheumatism 2018 Jun 23. WB  
27 Saunders.  
28  
29 (33) van Nies JA, Brouwer E, van Gaalen FA, Allaart CF, Huizinga TW, Posthumus MD et al.  
30 Improved early identification of arthritis: evaluating the efficacy of Early Arthritis  
31 Recognition Clinics. *Ann Rheum Dis* 2012; 72(8):1295-301.  
32  
33 (34) Richardson JL, Langholz B, Bernstein L, Burciaga C, Danley K, Ross RK. Stage and delay in  
34 breast cancer diagnosis by race, socioeconomic status, age and year. *Br J Cancer* 1992;  
35 65(6):922-926.  
36  
37 (35) Smith EC, Ziogas A, Anton-Culver H. Delay in surgical treatment and survival after breast  
38 cancer diagnosis in young women by race/ethnicity. *JAMA Surg* 2013; 148(6):516-523.  
39  
40 (36) Griffiths B, Situnayake RD, Clark B, Tennant A, Salmon M, Emery P. Racial origin and its effect  
41 on disease expression and HLA-DRB1 types in patients with rheumatoid arthritis: a matched  
42 cross-sectional study. *Rheumatology (Oxford)* 2000; 39(8):857-864.  
43  
44 (37) Kumar K, Daley E, Khattak F, Buckley CD, Raza K. The influence of ethnicity on the extent of,  
45 and reasons underlying, delay in general practitioner consultation in patients with RA.  
46 *Rheumatology (Oxford)* 2010; 49(5):1005-1012  
47  
48 (38) Tiwana R, Rowland J, Fincher M, Raza K, Stack RJ. Social interactions at the onset of  
49 rheumatoid arthritis and their influence on help-seeking behaviour: A qualitative  
50 exploration. *British journal of health psychology*. 2015 Sep;20(3):648-61.  
51  
52 (39) Mølbæk K, Hørslev-Petersen K, Primdahl J. Diagnostic delay in rheumatoid arthritis: a  
53 qualitative study of symptom interpretation before the first visit to the doctor.  
54 *Musculoskeletal care*. 2016 Mar;14(1):26-36.  
55  
56  
57  
58  
59  
60

- 1  
2  
3 (40) Simons G, Mallen CD, Kumar K, Stack RJ, Raza K. A Qualitative Investigation of the Barriers to  
4 Help-seeking Among Members of the Public Presented with Symptoms of New-onset  
5 Rheumatoid Arthritis. *J Rheumatol* 2015; 42(4):585-592.  
6  
7 (41) Sheppard J, Kumar K, Buckley CD, Shaw KL, Raza K. 'I just thought it was normal aches and  
8 pains': a qualitative study of decision-making processes in patients with early rheumatoid  
9 arthritis. *Rheumatology (Oxford)* 2008; 47(10):1577-1582.  
10  
11 (42) Stack RJ, Shaw K, Mallen C, Herron-Marx S, Horne R, Raza K. Delays in help seeking at the  
12 onset of the symptoms of rheumatoid arthritis: a systematic synthesis of qualitative  
13 literature. *Ann Rheum Dis* 2012; 71(4):493-497.  
14  
15 (43) Townsend A, Wyke S, Hunt K. Self-managing and managing self: practical and moral  
16 dilemmas in accounts of living with chronic illness. *Chronic Illn* 2006; 2(3):185-194.  
17  
18 (44) Scott IC, Mangat N, MacGregor A, Raza K, Mallen CD, Hider SL. Primary care challenges in  
19 diagnosing and referring patients with suspected rheumatoid arthritis: a national cross-  
20 sectional GP survey. *Rheumatology Advances in Practice*. 2018 Apr 6;2(1):rky012.  
21  
22 (45) De Cock D, Meyfroidt S, Joly J, Van der Elst K, Westhovens R, Verschueren P. A detailed  
23 analysis of treatment delay from the onset of symptoms in early rheumatoid arthritis  
24 patients. *Scand J Rheumatol* 2014; 43(1):1-8.  
25  
26 (46) Simons G, Belcher J, Morton C, Kumar K, Falahee M, Mallen CD, Stack RJ, Raza K. Symptom  
27 Recognition and Perceived Urgency of Help-Seeking for Rheumatoid Arthritis and Other  
28 Diseases in the General Public: A Mixed Method Approach. *Arthritis care & research*. 2017  
29 May;69(5):633-41.  
30  
31  
32  
33  
34  
35  
36  
37  
38  
39  
40  
41  
42  
43  
44  
45  
46  
47  
48  
49  
50  
51  
52  
53  
54  
55  
56  
57  
58  
59  
60

## STROBE Statement—checklist of items that should be included in reports of observational studies

|                          | Item No | Recommendation                                                                                                                                                                             |                                      |
|--------------------------|---------|--------------------------------------------------------------------------------------------------------------------------------------------------------------------------------------------|--------------------------------------|
| Title and abstract       | 1       | (a) Indicate the study's design with a commonly used term in the title or the abstract                                                                                                     | Yes (Page 1)                         |
|                          |         | (b) Provide in the abstract an informative and balanced summary of what was done and what was found                                                                                        | Yes (page 4)                         |
| <b>Introduction</b>      |         |                                                                                                                                                                                            |                                      |
| Background/rationale     | 2       | Explain the scientific background and rationale for the investigation being reported                                                                                                       | Yes (pages 5-7)                      |
| Objectives               | 3       | State specific objectives, including any prespecified hypotheses                                                                                                                           | Yes (pages 6-7)                      |
| <b>Methods</b>           |         |                                                                                                                                                                                            |                                      |
| Study design             | 4       | Present key elements of study design early in the paper                                                                                                                                    | Yes (page 1, and page 7)             |
| Setting                  | 5       | Describe the setting, locations, and relevant dates, including periods of recruitment, exposure, follow-up, and data collection                                                            | Yes (page 7- 9)                      |
| Participants             | 6       | (a) <i>Cohort study</i> —Give the eligibility criteria, and the sources and methods of selection of participants. Describe methods of follow-up                                            | Cross-sectional study – Yes (Page 7) |
|                          |         | <i>Case-control study</i> —Give the eligibility criteria, and the sources and methods of case ascertainment and control selection. Give the rationale for the choice of cases and controls |                                      |
| Variables                | 7       | <i>Cross-sectional study</i> —Give the eligibility criteria, and the sources and methods of selection of participants                                                                      | Yes (page 7-8)                       |
|                          |         | (b) <i>Cohort study</i> —For matched studies, give matching criteria and number of exposed and unexposed                                                                                   |                                      |
|                          |         | <i>Case-control study</i> —For matched studies, give matching criteria and the number of controls per case                                                                                 |                                      |
| Data sources/measurement | 8*      | For each variable of interest, give sources of data and details of methods of assessment (measurement). Describe comparability of assessment methods if there is more than one group       | Yes (page 7-8, also see table 1)     |
| Bias                     | 9       | Describe any efforts to address potential sources of bias                                                                                                                                  | Yes (Pages 17-22)                    |
| Study size               | 10      | Explain how the study size was arrived at                                                                                                                                                  | N/A                                  |
| Quantitative variables   | 11      | Explain how quantitative variables were handled in the analyses. If applicable, describe which groupings were chosen and why                                                               | Yes (page 10)                        |
| Statistical methods      | 12      | (a) Describe all statistical methods, including those used to control for confounding                                                                                                      | Yes (page 10)                        |

1  
2  
3  
4  
5  
6  
7  
8  
9  
10  
11  
12  
13  
14  
15  
16  
17  
18  
19  
20  
21  
22  
23  
24  
25  
26  
27  
28  
29  
30  
31  
32  
33  
34  
35  
36  
37  
38  
39  
40  
41  
42  
43  
44  
45  
46  
47  
48  
49  
50  
51  
52  
53  
54  
55  
56  
57  
58  
59  
60

(b) Describe any methods used to examine subgroups and interactions

---

Yes

(c) Explain how missing data were addressed

---

(d) *Cohort study*—If applicable, explain how loss to follow-up was addressed

N/A

*Case-control study*—If applicable, explain how matching of cases and controls was addressed

*Cross-sectional study*—If applicable, describe analytical methods taking account of sampling strategy

---

€ Describe any sensitivity analyses

Continued on next page

For peer review only

| <b>Results</b>           |     |                                                                                                                                                                                                                                                                                                                                                                                                               |                                           |
|--------------------------|-----|---------------------------------------------------------------------------------------------------------------------------------------------------------------------------------------------------------------------------------------------------------------------------------------------------------------------------------------------------------------------------------------------------------------|-------------------------------------------|
| Participants             | 13* | (a) Report numbers of individuals at each stage of study—eg numbers potentially eligible, examined for eligibility, confirmed eligible, included in the study, completing follow-up, and analysed<br>(b) Give reasons for non-participation at each stage<br>(c) Consider use of a flow diagram                                                                                                               | Yes (pages 17-18)<br>N/A<br>N/A           |
| Descriptive data         | 14* | (a) Give characteristics of study participants (eg demographic, clinical, social) and information on exposures and potential confounders<br>(b) Indicate number of participants with missing data for each variable of interest<br>(c) <i>Cohort study</i> —Summarise follow-up time (eg, average and total amount)                                                                                           | Yes (pages 17-18)<br>Yes (table 1)<br>N/A |
| Outcome data             | 15* | <i>Cohort study</i> —Report numbers of outcome events or summary measures over time<br><i>Case-control study</i> —Report numbers in each exposure category, or summary measures of exposure<br><i>Cross-sectional study</i> —Report numbers of outcome events or summary measures                                                                                                                             | N/A<br>N/A<br>Yes                         |
| Main results             | 16  | (a) Give unadjusted estimates and, if applicable, confounder-adjusted estimates and their precision (eg, 95% confidence interval). Make clear which confounders were adjusted for and why they were included<br>(b) Report category boundaries when continuous variables were categorized<br>(c) If relevant, consider translating estimates of relative risk into absolute risk for a meaningful time period | N/A<br>Yes (pages 17-18)<br>N/A           |
| Other analyses           | 17  | Report other analyses done—eg analyses of subgroups and interactions, and sensitivity analyses                                                                                                                                                                                                                                                                                                                | N/A                                       |
| <b>Discussion</b>        |     |                                                                                                                                                                                                                                                                                                                                                                                                               |                                           |
| Key results              | 18  | Summarise key results with reference to study objectives                                                                                                                                                                                                                                                                                                                                                      | Yes (Page 22)                             |
| Limitations              | 19  | Discuss limitations of the study, taking into account sources of potential bias or imprecision. Discuss both direction and magnitude of any potential bias                                                                                                                                                                                                                                                    | Yes (page 20)                             |
| Interpretation           | 20  | Give a cautious overall interpretation of results considering objectives, limitations, multiplicity of analyses, results from similar studies, and other relevant evidence                                                                                                                                                                                                                                    | Yes (page 20-22)                          |
| Generalisability         | 21  | Discuss the generalisability (external validity) of the study results                                                                                                                                                                                                                                                                                                                                         | Yes (page 22)                             |
| <b>Other information</b> |     |                                                                                                                                                                                                                                                                                                                                                                                                               |                                           |
| Funding                  | 22  | Give the source of funding and the role of the funders for the present study and, if applicable, for the original study on which the present article is based                                                                                                                                                                                                                                                 | Yes (page 25)                             |

\*Give information separately for cases and controls in case-control studies and, if applicable, for exposed and unexposed groups in cohort and cross-sectional studies.

**Note:** An Explanation and Elaboration article discusses each checklist item and gives methodological background and published examples of transparent reporting. The STROBE checklist is best used in conjunction with this article (freely

1  
2  
3  
4  
5  
6  
7  
8  
9  
10  
11  
12  
13  
14  
15  
16  
17  
18  
19  
20  
21  
22  
23  
24  
25  
26  
27  
28  
29  
30  
31  
32  
33  
34  
35  
36  
37  
38  
39  
40  
41  
42  
43  
44  
45  
46  
47  
48  
49  
50  
51  
52  
53  
54  
55  
56  
57  
58  
59  
60

available on the Web sites of PLoS Medicine at <http://www.plosmedicine.org/>, Annals of Internal Medicine at <http://www.annals.org/>, and Epidemiology at <http://www.epidem.com/>). Information on the STROBE Initiative is available at [www.strobe-statement.org](http://www.strobe-statement.org).

For peer review only
